# Supplementary material for: Non-benzenoid N-aryl oxalamide: synthesis of troponyl-oxalamide peptides by Pd(ii)-catalyzed C(sp3)–H functionalization of glycinamides
Source: Royal Society of Chemistry journal article supplement (doi:10.1039/d4ob00800f), 2024-01-01
Supplement: d4ob00800f1.pdf [file d4ob00800f1.pdf]

## Electronic Supplementary Information (ESI)

### Nonbenzenoid *N*-Aryl Oxalamide: Synthesis of *troponyl*-Oxalamide Peptides by Pd(II)-Catalyzed C(sp<sup>3</sup>)-H Functionalization of Glycinamides

Chinmay K. Jena,<sup>a,b</sup> and Nagendra K. Sharma<sup>\*a,b</sup>

<sup>a</sup>School of Chemical Sciences, National Institute of Science Education and Research (NISER), Jatani-752050, Odisha, India.

<sup>b</sup> Homi Bhabha National Institute (HBNI)-Mumbai, Anushaktinagar, Mumbai, 400 094, India

\*Corresponding author. Tel.: 0674-249-4141; fax: +91 (674) 2494004; E-mail: [nagendra@niser.ac.in](mailto:nagendra@niser.ac.in)

### Contents

|                                                                                                                                                                           |     |
|---------------------------------------------------------------------------------------------------------------------------------------------------------------------------|-----|
| 1. NMR and Mass Spectra of Troponyl Glycine Derivatives ( <b>2</b> / <b>3a-3o</b> ) .....                                                                                 | S2  |
| 2. NMR and Mass Spectra of Oxidized Troponyl Glycine Derivatives ( <b>2a</b> / <b>4a-4o</b> ) .....                                                                       | S34 |
| 3. NMR Spectra of Non- <i>troponyl</i> ( <i>N</i> -Aryl and <i>N</i> - Alkyl) Glycine Derivatives ( <i>N</i> -phenyl glycinate and <i>N, N</i> - diethyl glycinate) ..... | S66 |
| 4. X-Ray Studies of Single Crystals ( <b>2a/4a/4b/4f/ 4g/2-Pd</b> ) .....                                                                                                 | S68 |

# 1. NMR and Mass Spectra of Troponyl Glycine Derivatives (2/ 3a- 3o)

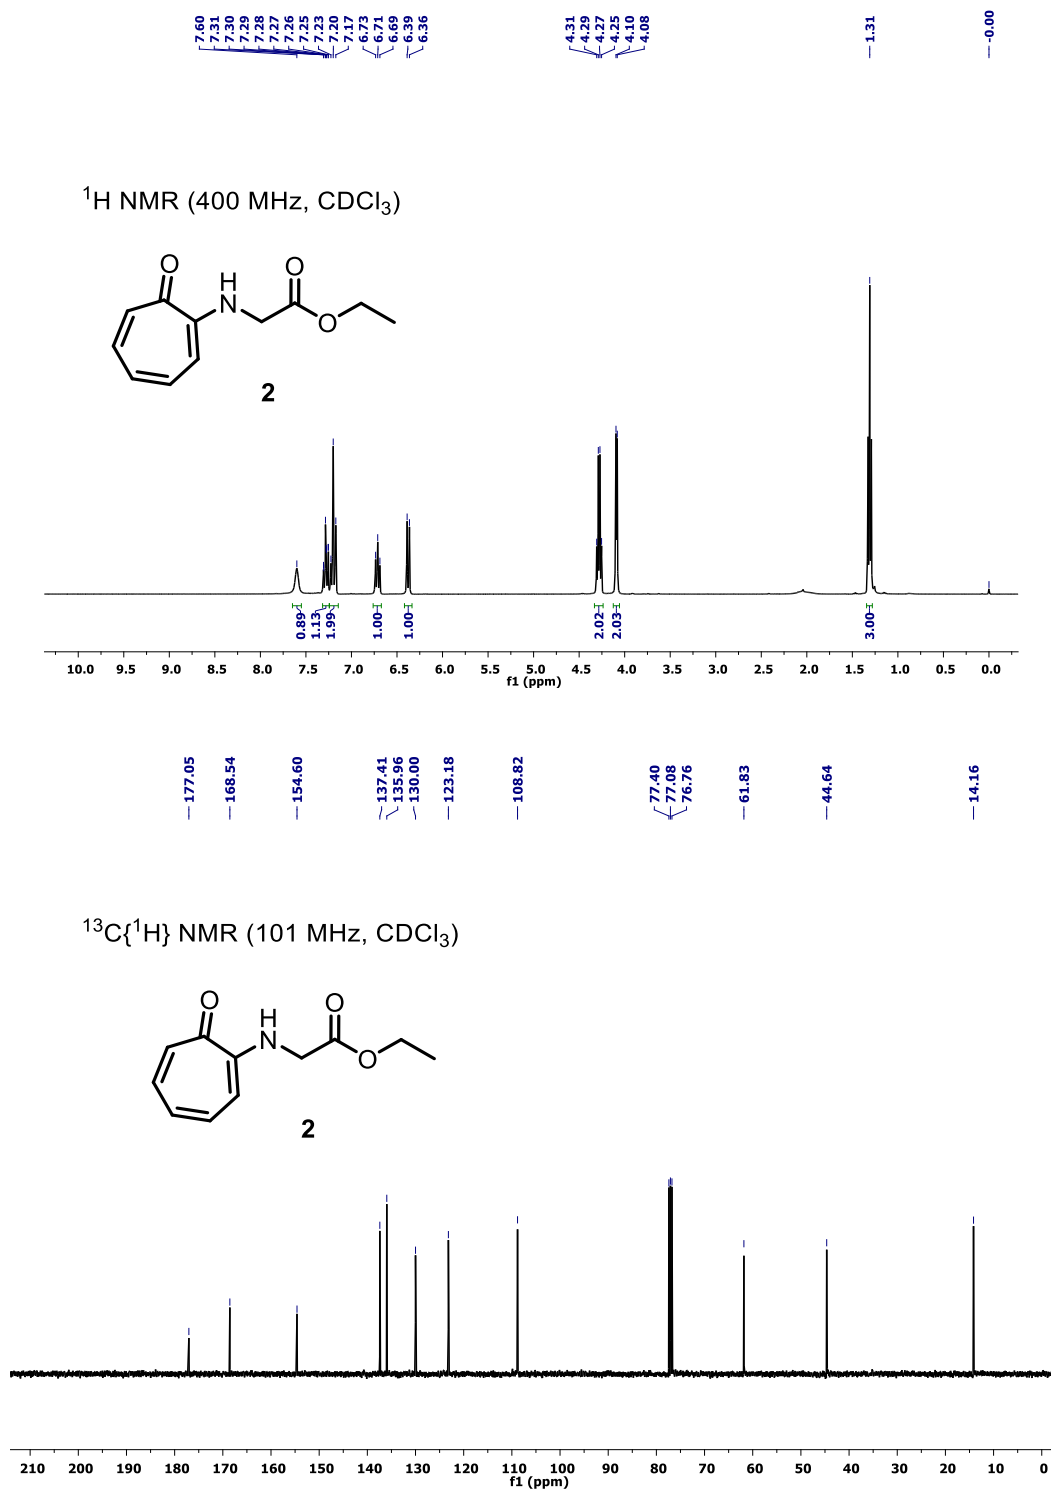

**Fig S1.** <sup>1</sup>H, <sup>13</sup>C {<sup>1</sup>H} NMR spectra of troponyl glycine derivative **2**.

NKS-CKJ-942

17-Oct-2022  
19:30:20

XEVO-G2XSQTOF#YFA1739

NKS\_17102022\_2 (0.053) Cu (0.05); ls (1.00,1.00) C<sub>11</sub>H<sub>13</sub>NO<sub>3</sub>Na

1: TOF MS ES+  
8.77e12

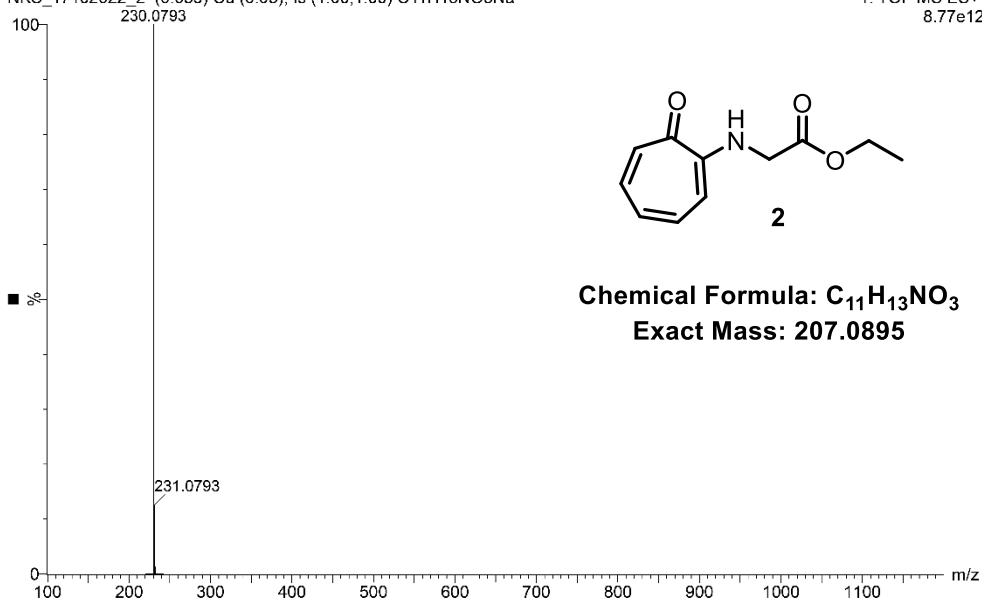

NKS\_17102022\_2 41 (0.829) Cm (41:48)

1: TOF MS ES+  
6.15e6

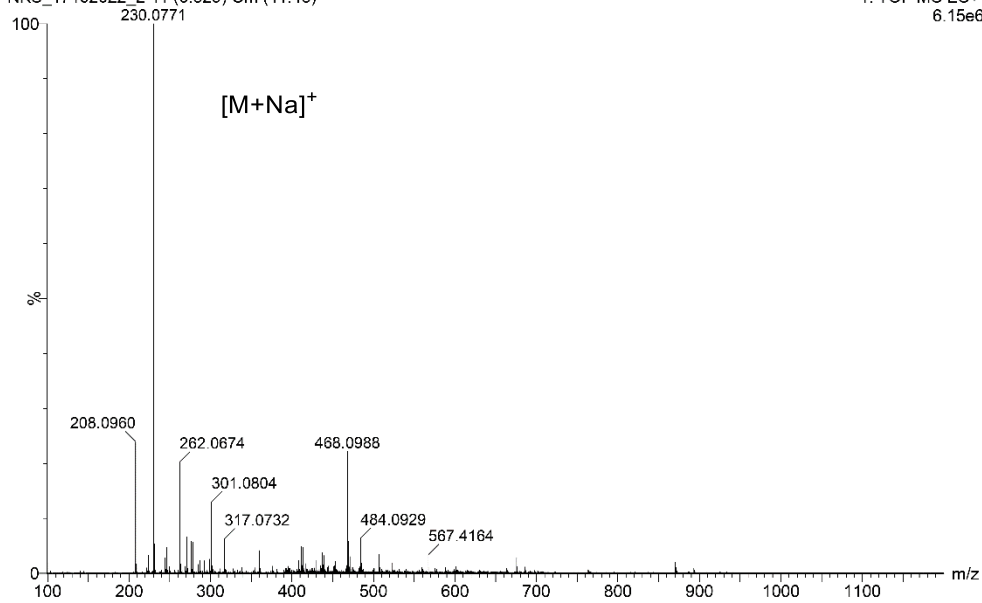

**Fig S2.** ESI-HRMS spectra of troponyl glycine derivative **2**.

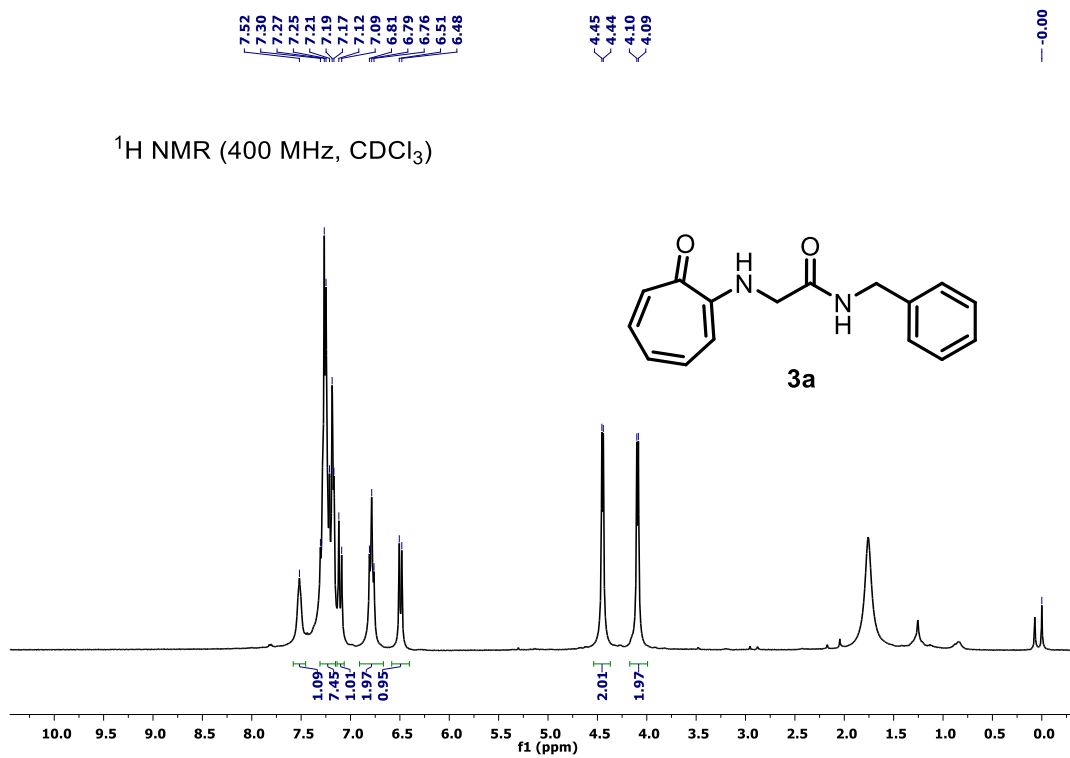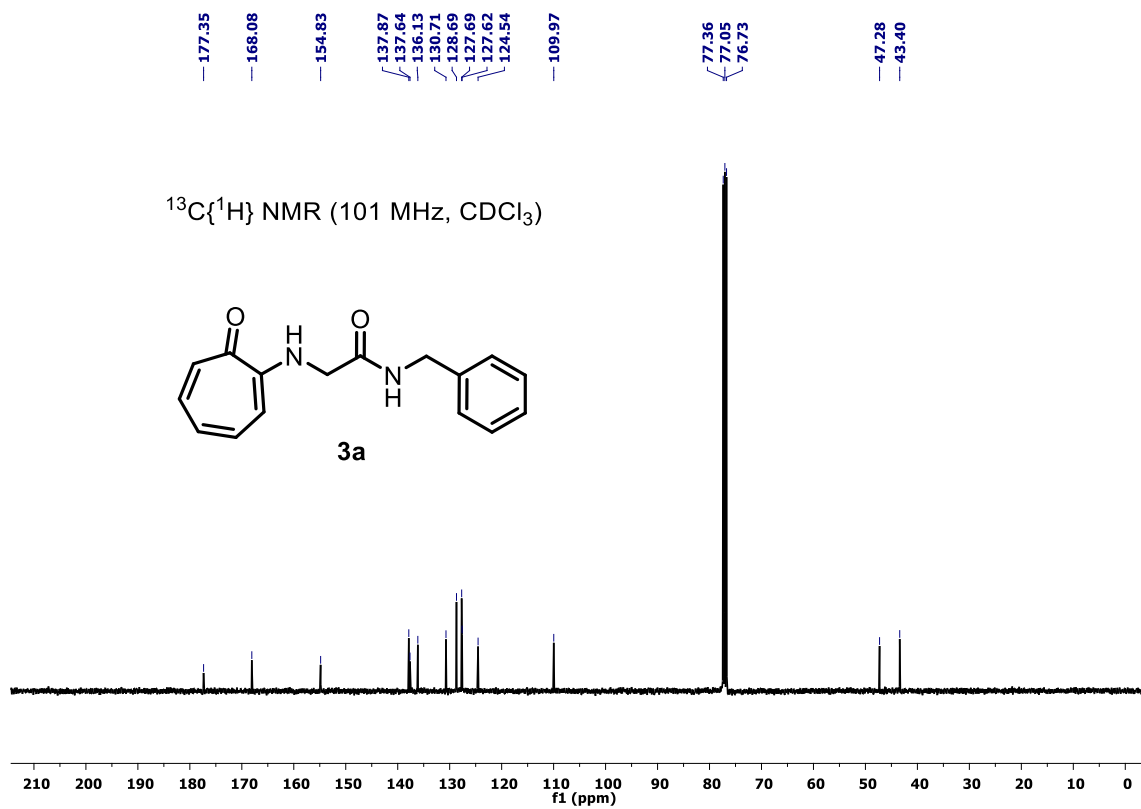

**Fig S3.** <sup>1</sup>H, <sup>13</sup>C {<sup>1</sup>H} NMR spectra of troponyl glycine derivative **3a**.

NKS-CKJ-403

18-Oct-2022

19:42:40

XEVO-G2XSQTOF#YFA1739

NKS\_18102022\_11 (0.053) Cu (0.05); Is (1.00,1.00) C<sub>16</sub>H<sub>16</sub>N<sub>2</sub>O<sub>2</sub>Na

1: TOF MS ES+  
8.30e12

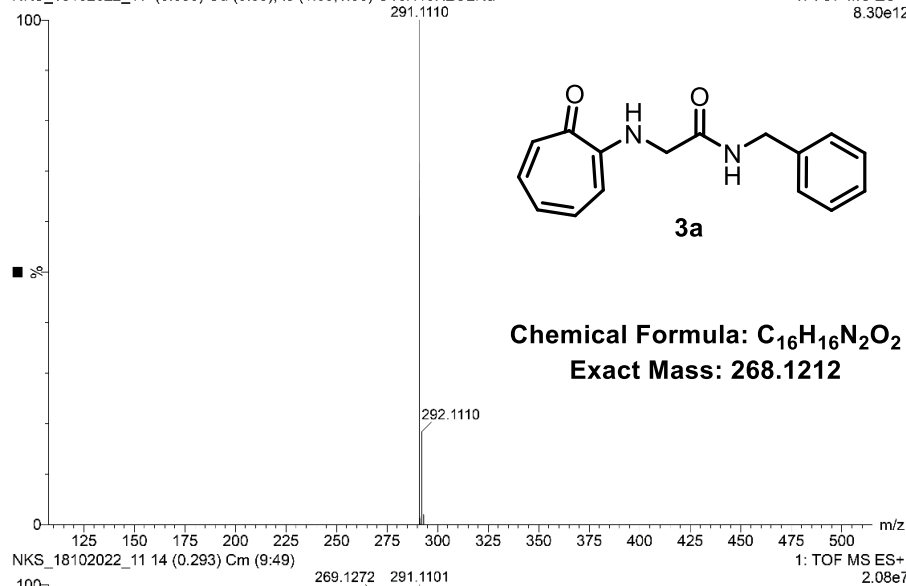

NKS\_18102022\_11 14 (0.293) Cm (9:49)

1: TOF MS ES+  
2.08e7

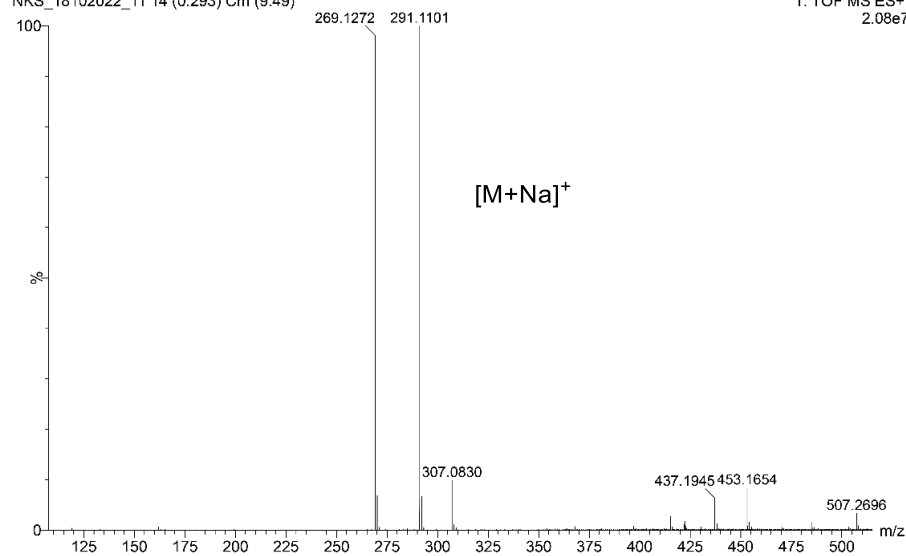

**Fig S4.** ESI-HRMS spectra of troponyl glycine derivative **3a**.

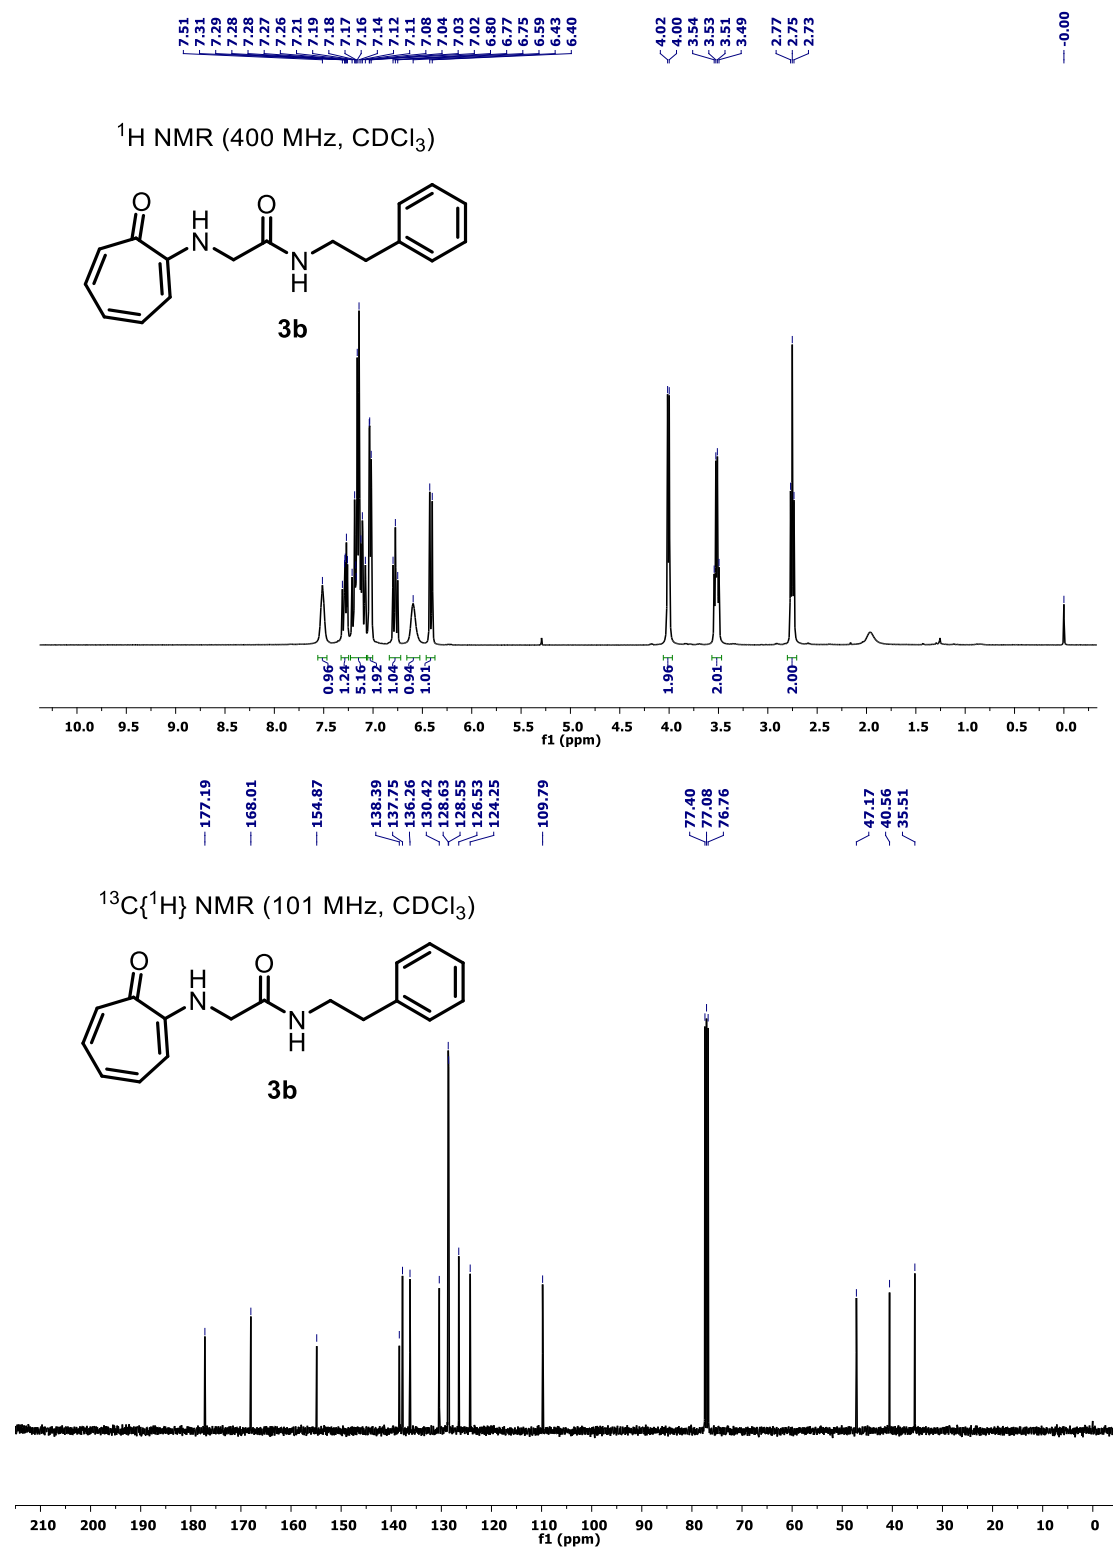

**Fig S5.** <sup>1</sup>H, <sup>13</sup>C {<sup>1</sup>H} NMR spectra of troponyl glycine derivative **3b**.

## Display Report

### Analysis Info

Analysis Name D:\Data\JULY-2021\NKS\17072021\_-NKS-CKJ-307.d  
Method Pos\_tune\_low\_05122019.m  
Sample Name Tmix-131118  
Comment

Acquisition Date 7/17/2021 5:24:25 PM

Operator Amit S.Sahu  
Instrument micrOTOF-Q II 10337

### Acquisition Parameter

|             |            |                       |           |                  |           |
|-------------|------------|-----------------------|-----------|------------------|-----------|
| Source Type | ESI        | Ion Polarity          | Positive  | Set Nebulizer    | 0.5 Bar   |
| Focus       | Not active | Set Capillary         | 4500 V    | Set Dry Heater   | 180 °C    |
| Scan Begin  | 50 m/z     | Set End Plate Offset  | -500 V    | Set Dry Gas      | 4.0 l/min |
| Scan End    | 3000 m/z   | Set Collision Cell RF | 130.0 Vpp | Set Divert Valve | Waste     |

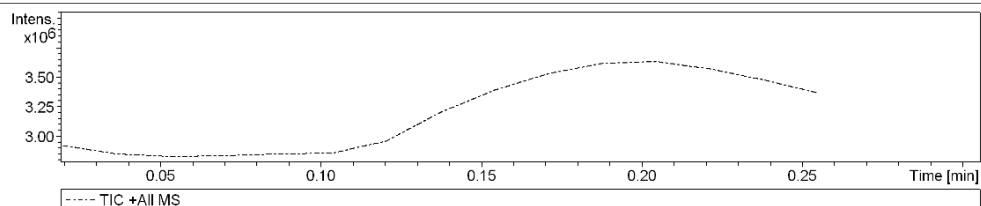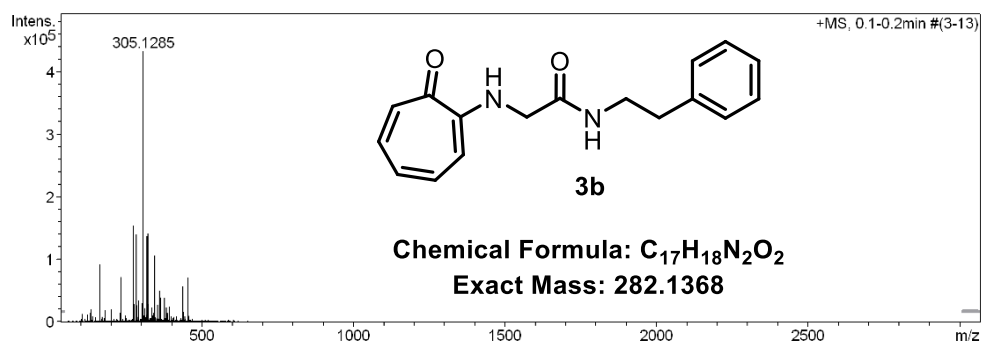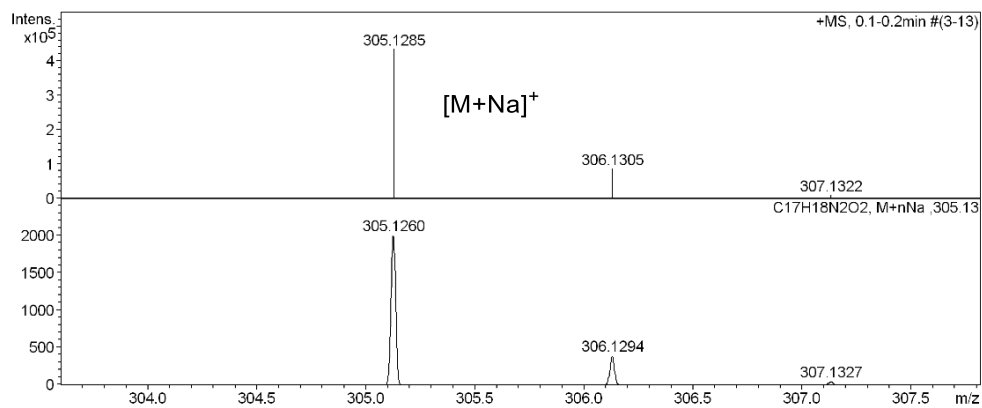

**Fig S6.** ESI-HRMS spectra of troponyl glycine derivative **3b**.

7.57  
7.55  
7.54  
7.35  
7.35  
7.33  
7.32  
7.32  
7.30  
7.30  
7.28  
7.25  
7.22  
7.20  
7.19  
6.81  
6.79  
6.76  
6.49  
6.47  
6.21  
6.20  
6.20  
4.02  
3.83  
3.82  
3.81  
3.80  
3.79  
3.78  
3.77  
3.76  
1.85  
1.84  
1.83  
1.82  
1.81  
1.68  
1.67  
1.66  
1.64  
1.63  
1.62  
1.60  
1.59  
1.58  
1.57  
1.56  
1.55  
1.34  
1.31  
1.13  
1.13  
1.12  
1.10  
1.09  
1.07  
1.06  
1.04  
1.03  
1.01  
1.00  
-0.00

$^1\text{H}$  NMR (400 MHz,  $\text{CDCl}_3$ )

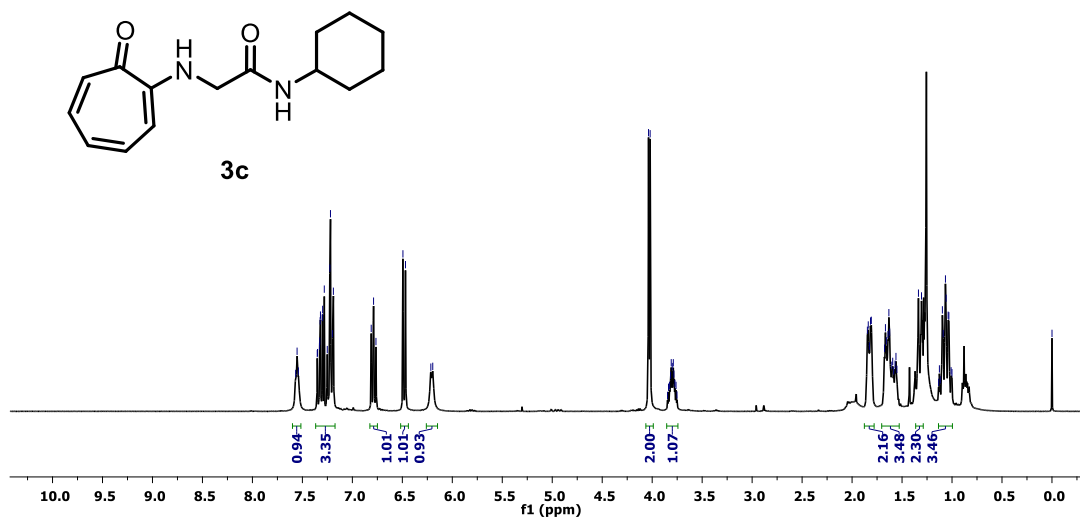

177.44  
166.88  
155.03  
137.85  
136.16  
130.68  
124.41  
109.88  
77.44  
77.12  
76.80  
48.47  
47.48  
33.00  
25.39  
24.86

$^{13}\text{C}\{^1\text{H}\}$  NMR (101 MHz,  $\text{CDCl}_3$ )

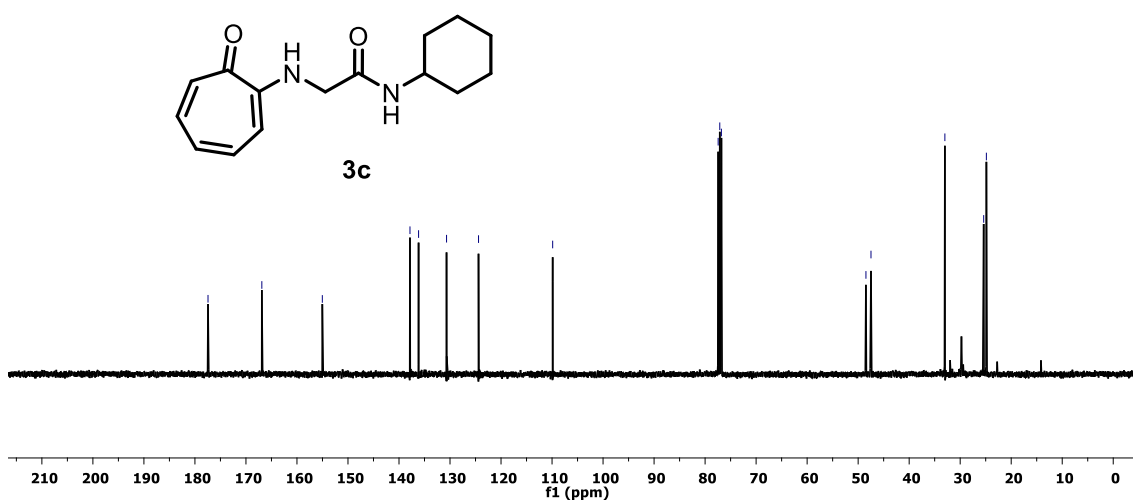

**Fig S7.**  $^1\text{H}$ ,  $^{13}\text{C}\{^1\text{H}\}$  NMR spectra of troponyl glycine derivative **3c**.



NKS\_CKJ\_1050

16-Feb-2023  
01:46:53

XEVO-G2XSQTOF#YFA1739

NKS\_15022023\_13 (0.053) Cu (0.05); Is (1.00,1.00) C<sub>15</sub>H<sub>20</sub>N<sub>2</sub>O<sub>2</sub>Na

1: TOF MS ES+  
8.39e12

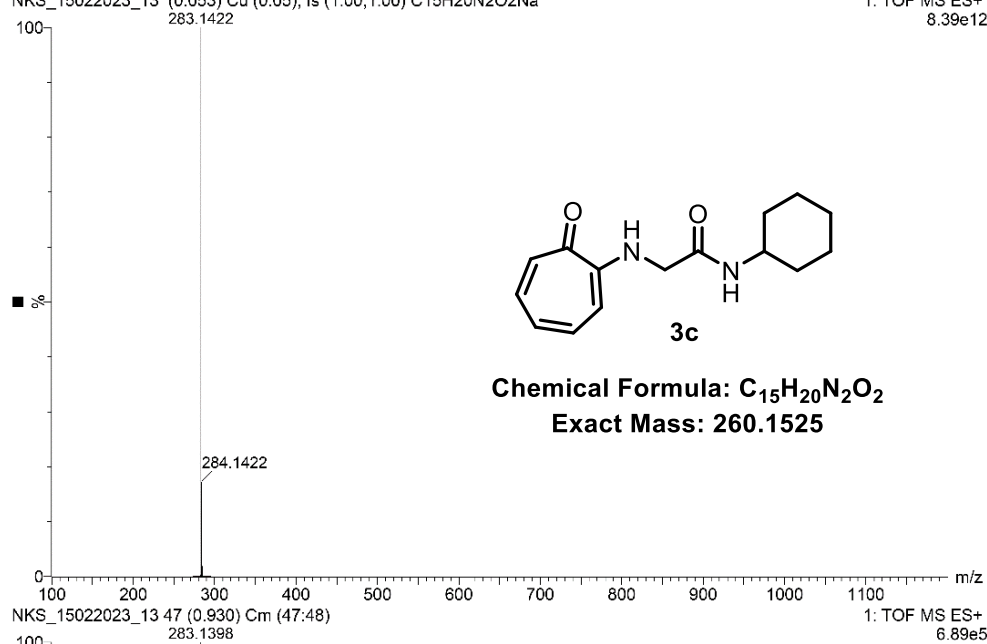

NKS\_15022023\_13 47 (0.930) Cm (47:48)

1: TOF MS ES+  
6.89e5

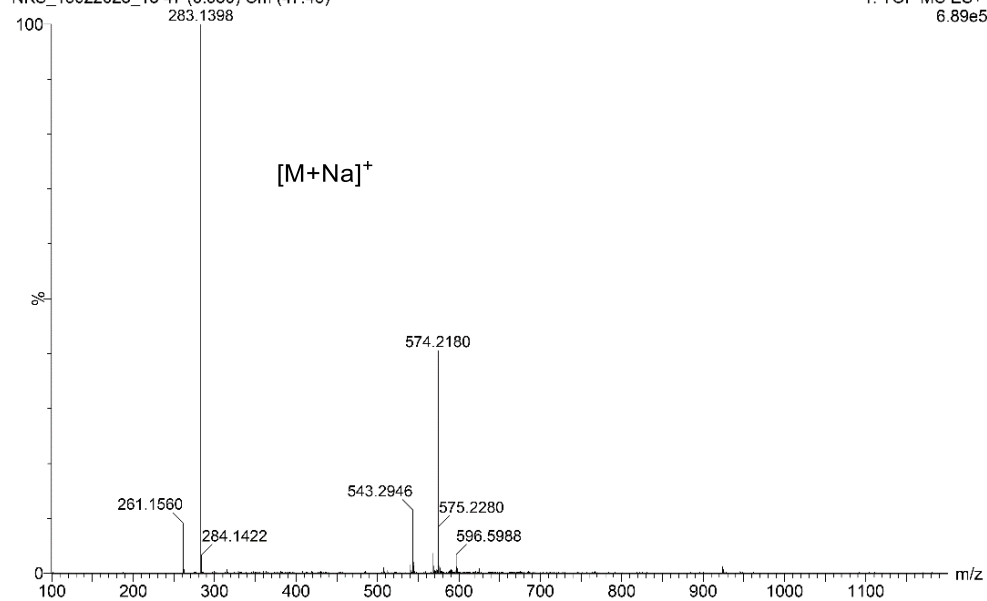

**Fig S8.** ESI-HRMS spectra of troponyl glycine derivative **3c**.

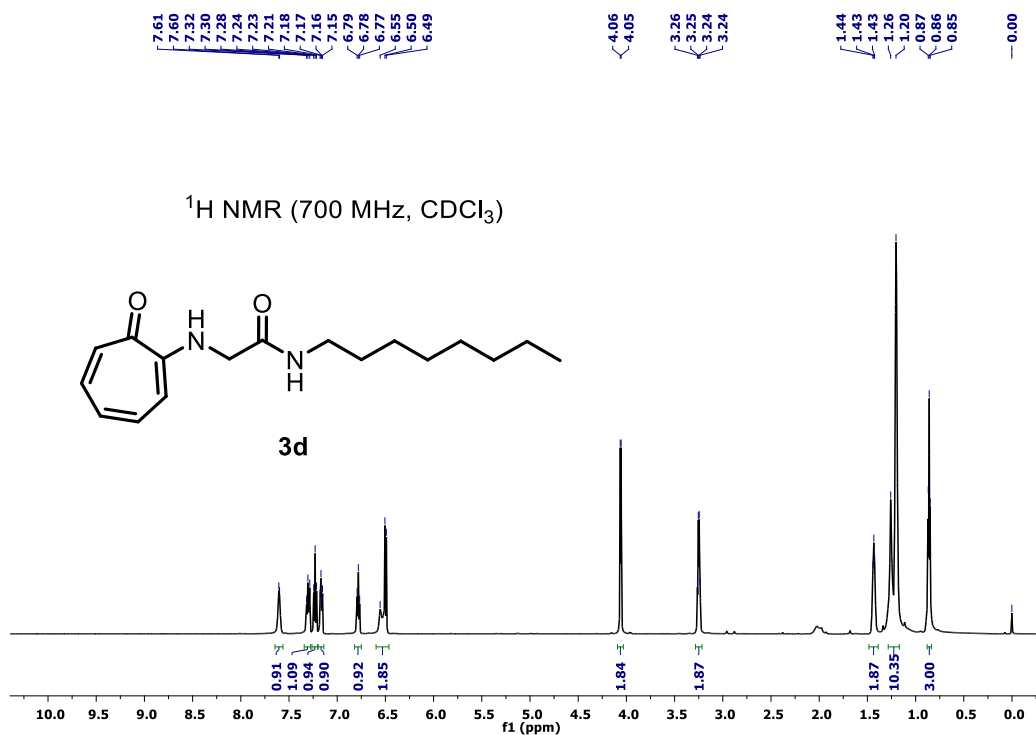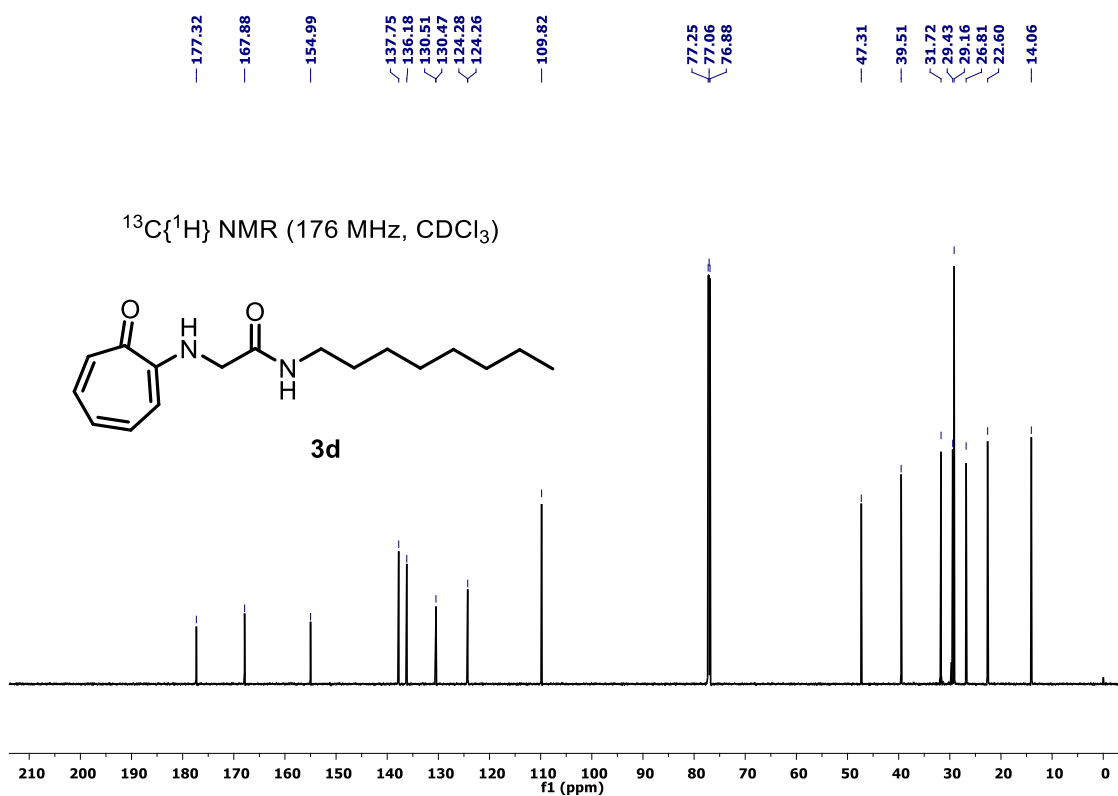

**Fig S9.** <sup>1</sup>H, <sup>13</sup>C {<sup>1</sup>H} NMR spectra of troponyl glycine derivative **3d**.

NKS\_CKJ\_1104

20-Feb-2023  
18:10:25

XEVO-G2XSQTOF#YFA1739

NKS\_20022023\_3 (0.053) Cu (0.05); Is (1.00,1.00) C<sub>17</sub>H<sub>26</sub>N<sub>2</sub>O<sub>2</sub>Na

1: TOF MS ES+  
8.20e12

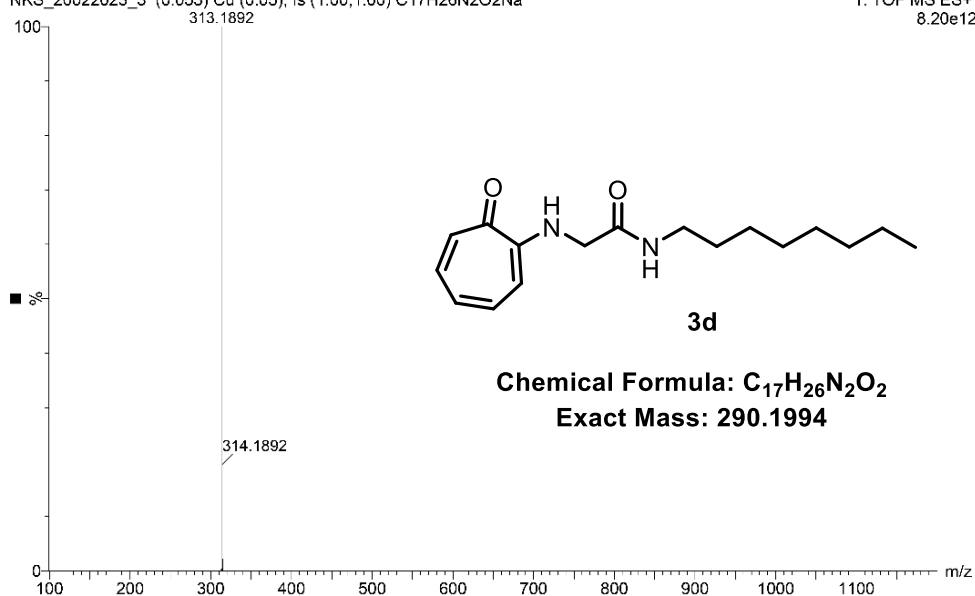

NKS\_20022023\_3 47 (0.930) Cm (47.48)

1: TOF MS ES+  
2.28e6

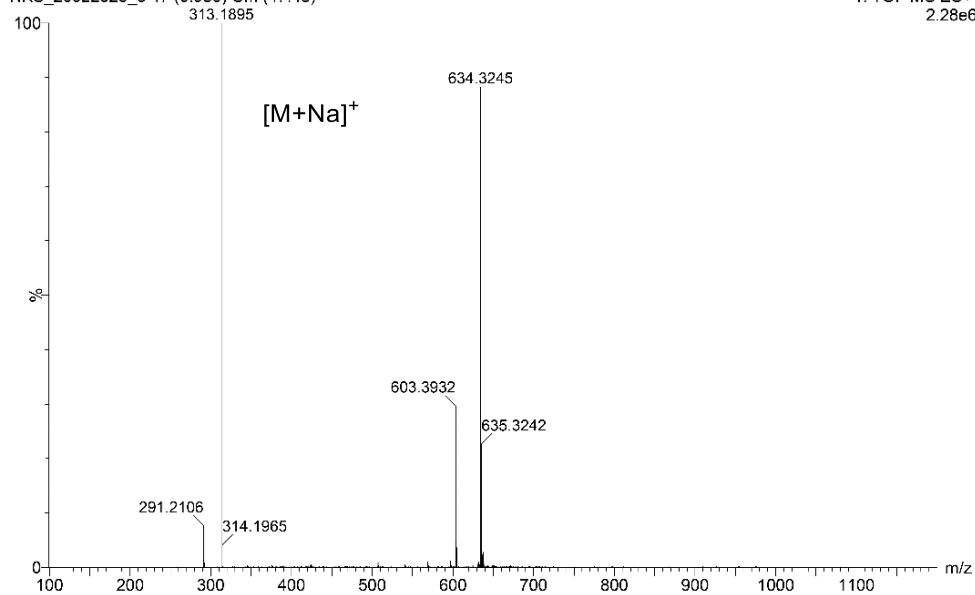

**Fig S10.** ESI-HRMS spectra of troponyl glycine derivative **3d**.

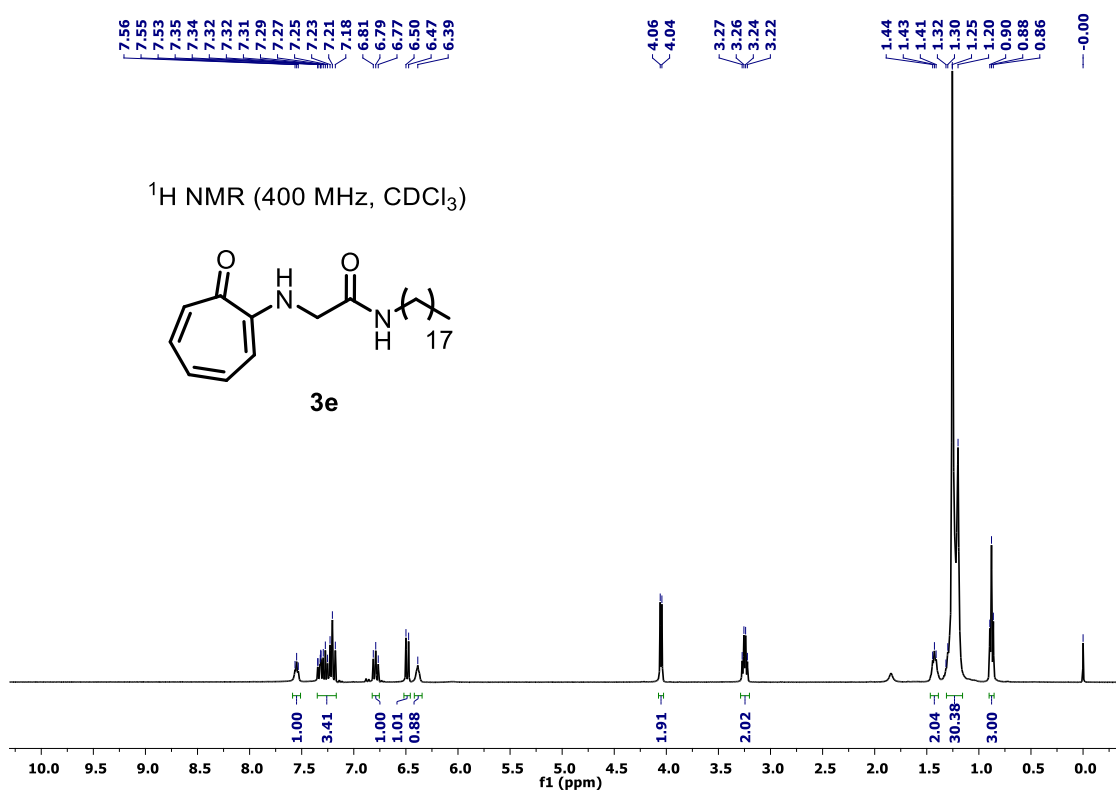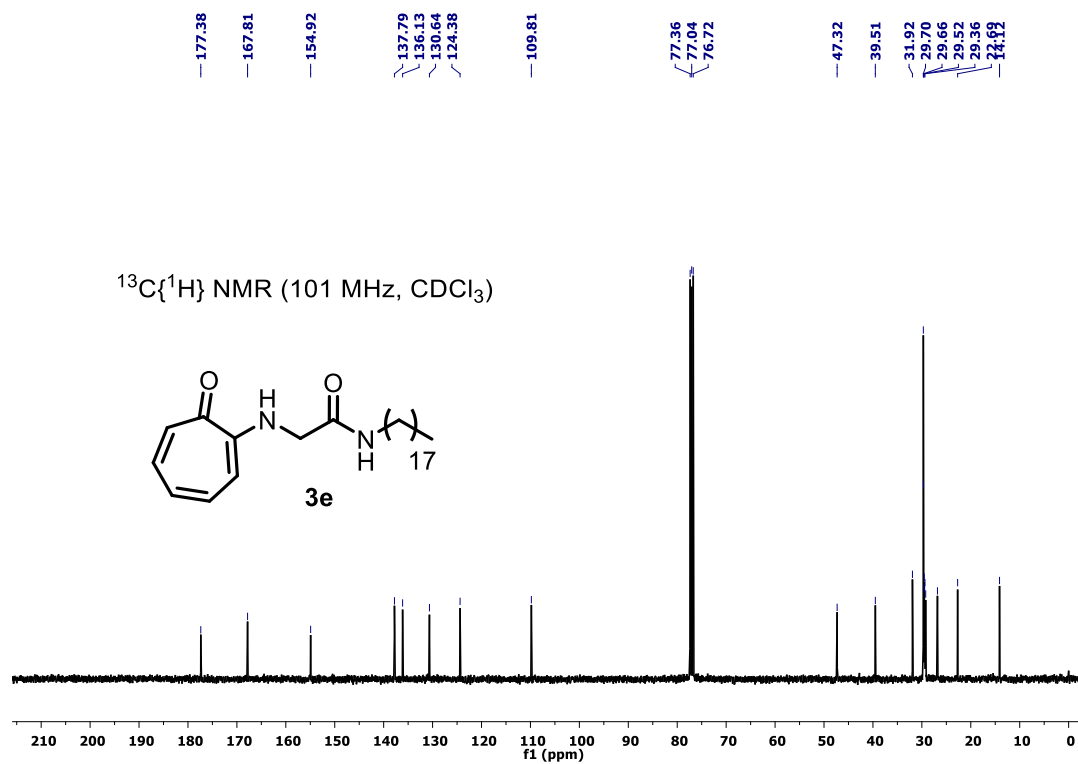

**Fig S11.** <sup>1</sup>H, <sup>13</sup>C {<sup>1</sup>H} NMR spectra of troponyl glycine derivative **3e**.

NKS\_CKJ\_1115

07-Mar-2023

21:03:46

XEVO-G2XSQTOF#YFA1739

NKS\_07032023\_4 (0.053) Cu (0.05); Is (1.00,1.00) C<sub>27</sub>H<sub>47</sub>N<sub>2</sub>O<sub>2</sub>

1: TOF MS ES+  
7.35e12

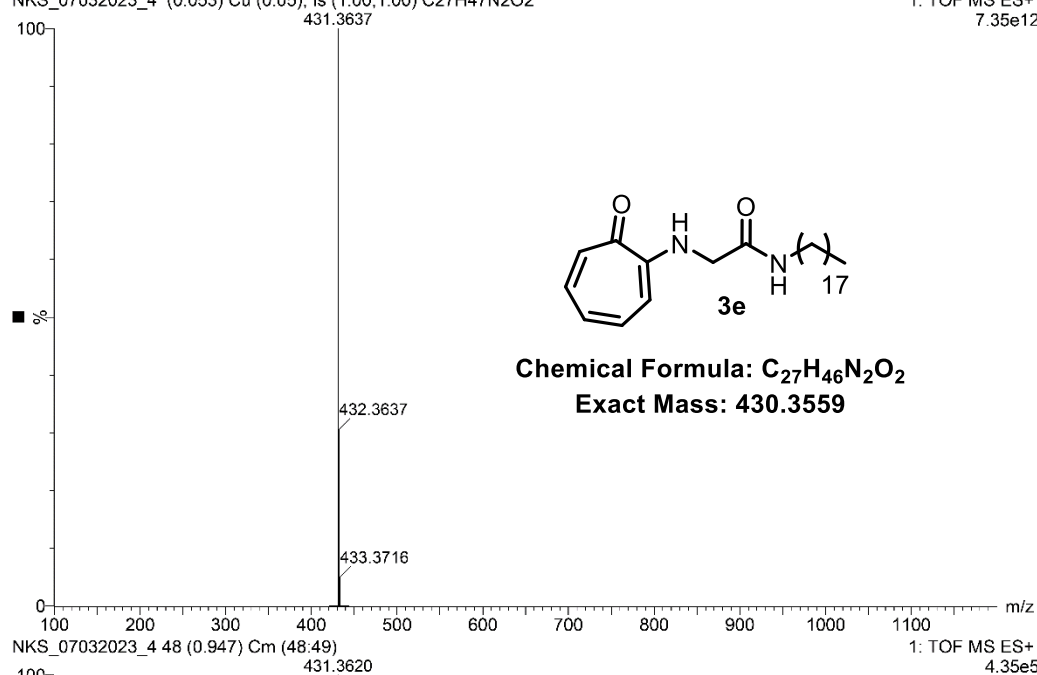

**Fig S12.** ESI-HRMS spectra of troponyl glycine derivative **3e**.

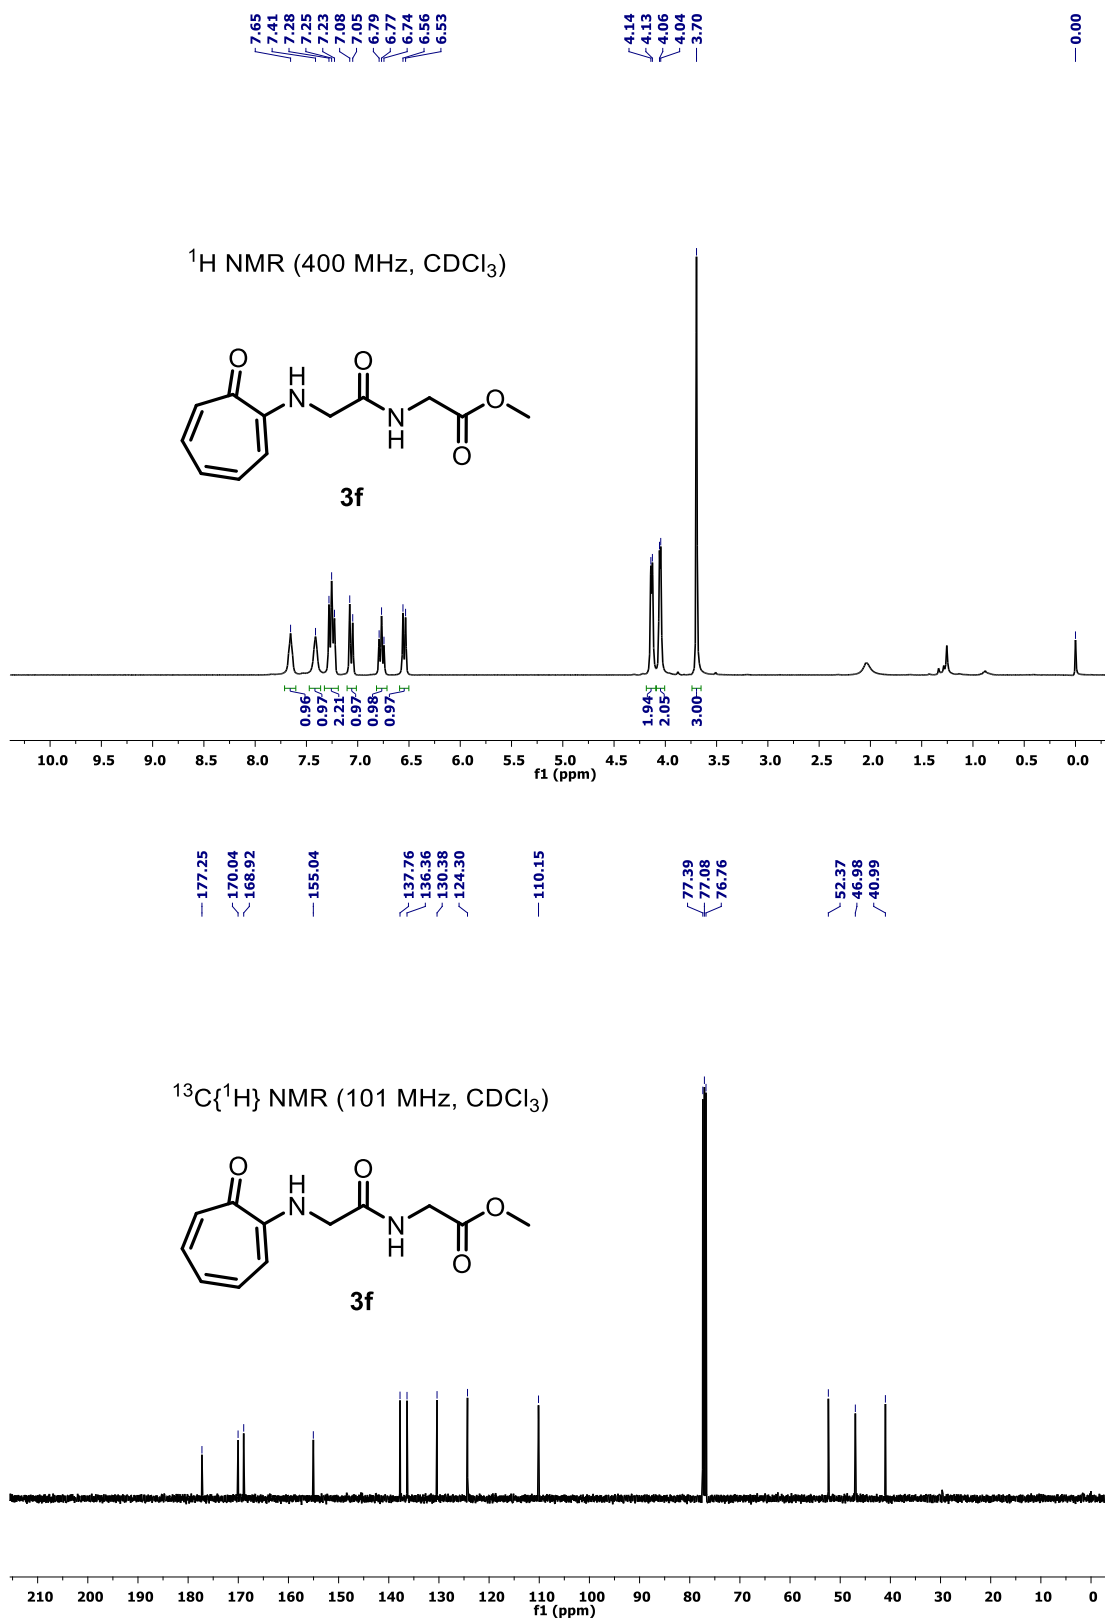

**Fig S13.** <sup>1</sup>H, <sup>13</sup>C {<sup>1</sup>H} NMR spectra of troponyl glycine derivative **3f**.

NKS\_CKJ\_998

07-Nov-2022  
17:38:07

XEVO-G2XSQTOF#YFA1739

NKS\_07112022\_5 (0.053) Cu (0.05); ls (1.00,1.00) C<sub>12</sub>H<sub>14</sub>N<sub>2</sub>O<sub>4</sub>Na

1: TOF MS ES+  
8.63e12

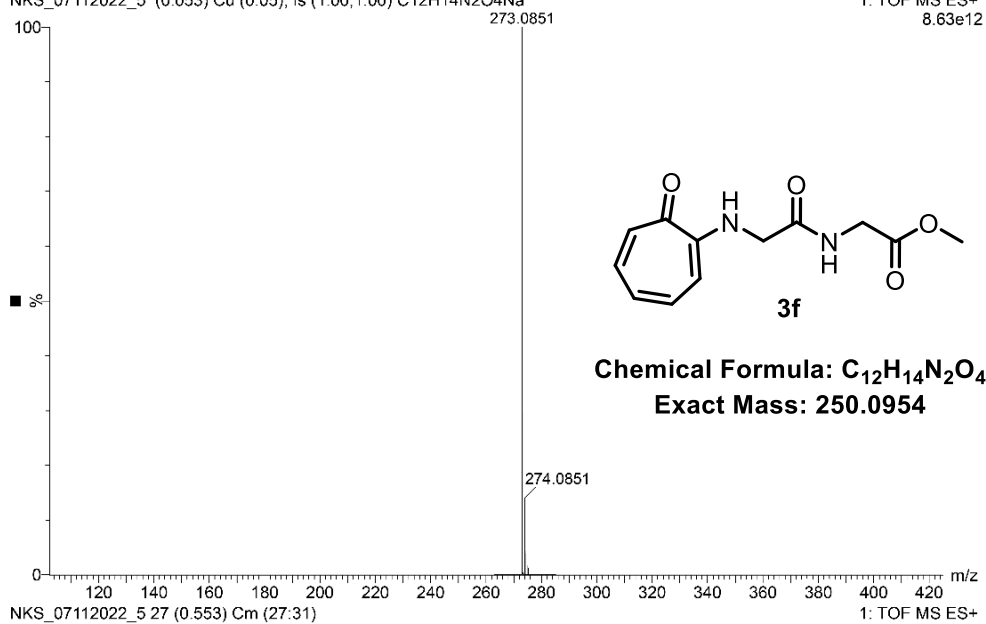

NKS\_07112022\_5 27 (0.553) Cm (27:31)

1: TOF MS ES+  
1.96e7

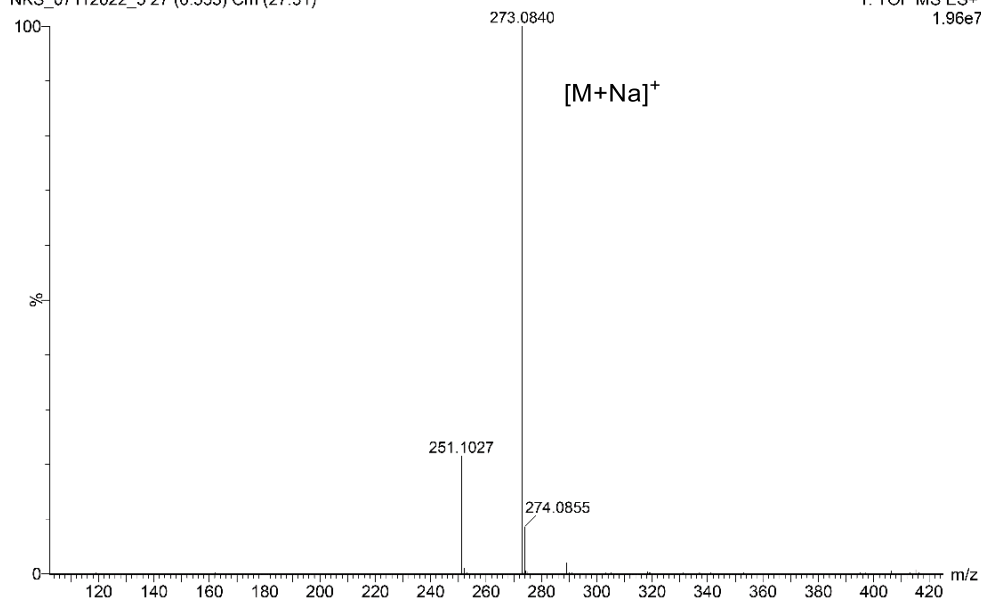

**Fig S14.** ESI-HRMS spectra of troponyl glycine derivative **3f**.

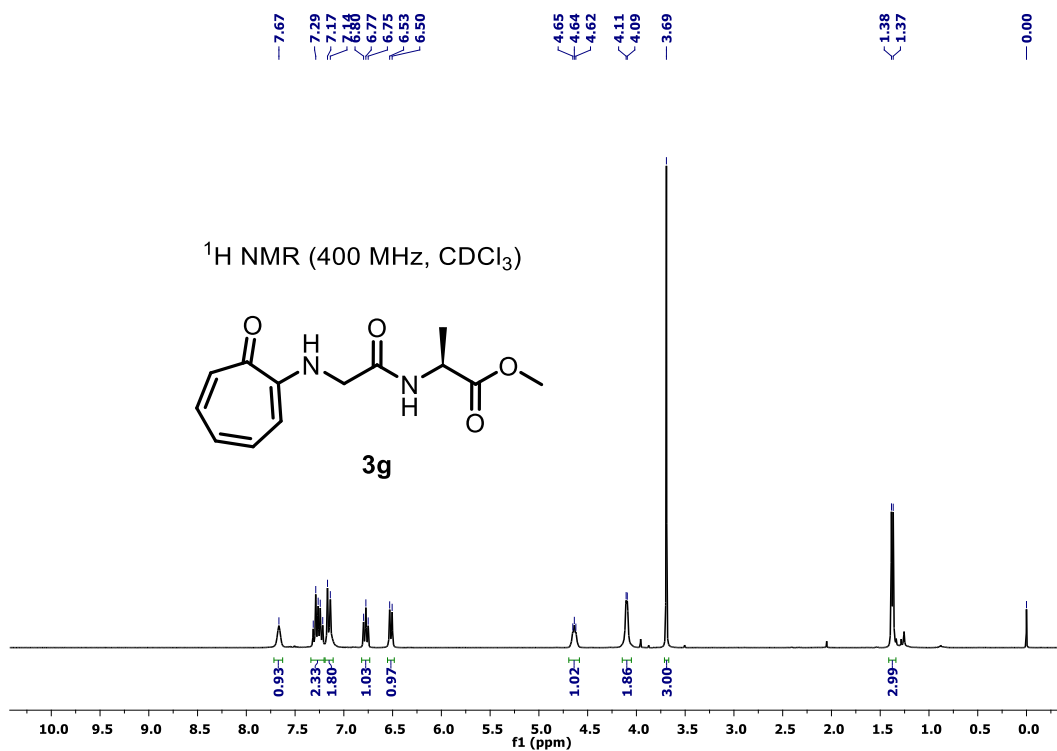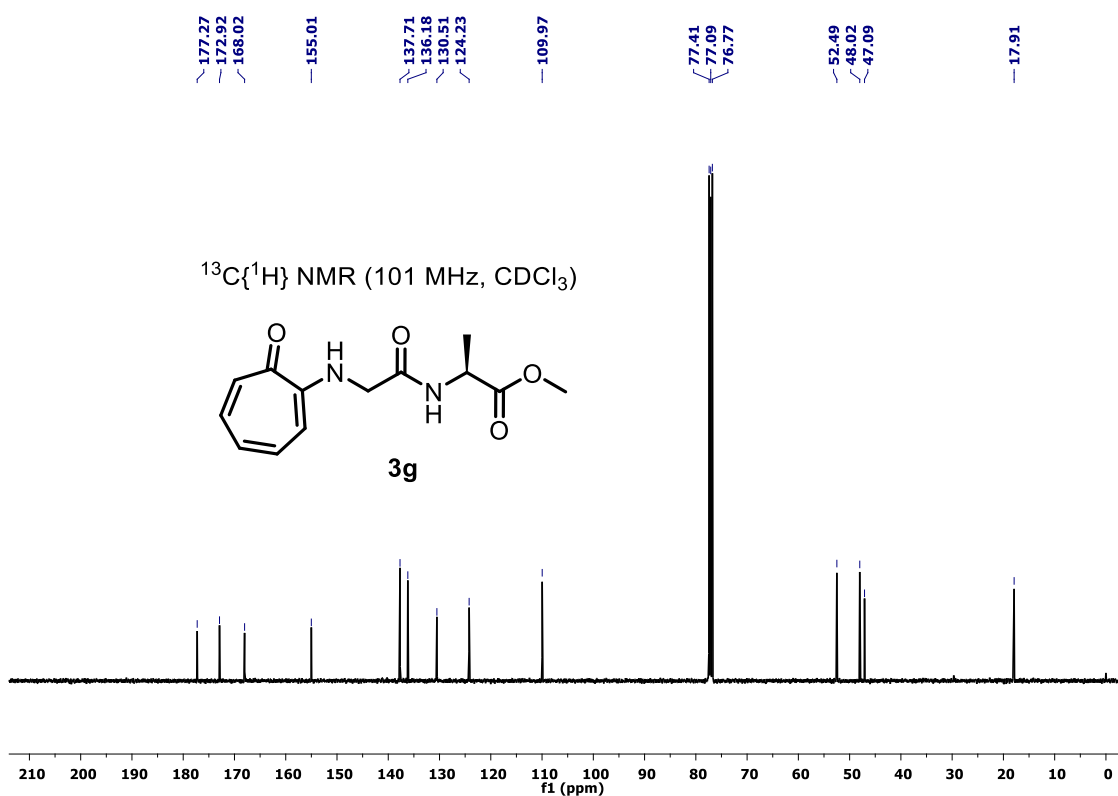

**Fig S15.** <sup>1</sup>H, <sup>13</sup>C {<sup>1</sup>H} NMR spectra of troponyl glycine derivative **3g**.



NKS\_CKJ\_1018

01-Dec-2022  
00:54:04

XEVO-G2XSQTOF#YFA1739

NKS\_30112022\_3 (0.053) Cu (0.05); Is (1.00,1.00) C<sub>13</sub>H<sub>16</sub>N<sub>2</sub>O<sub>4</sub>Na

1: TOF MS ES+  
8.53e12

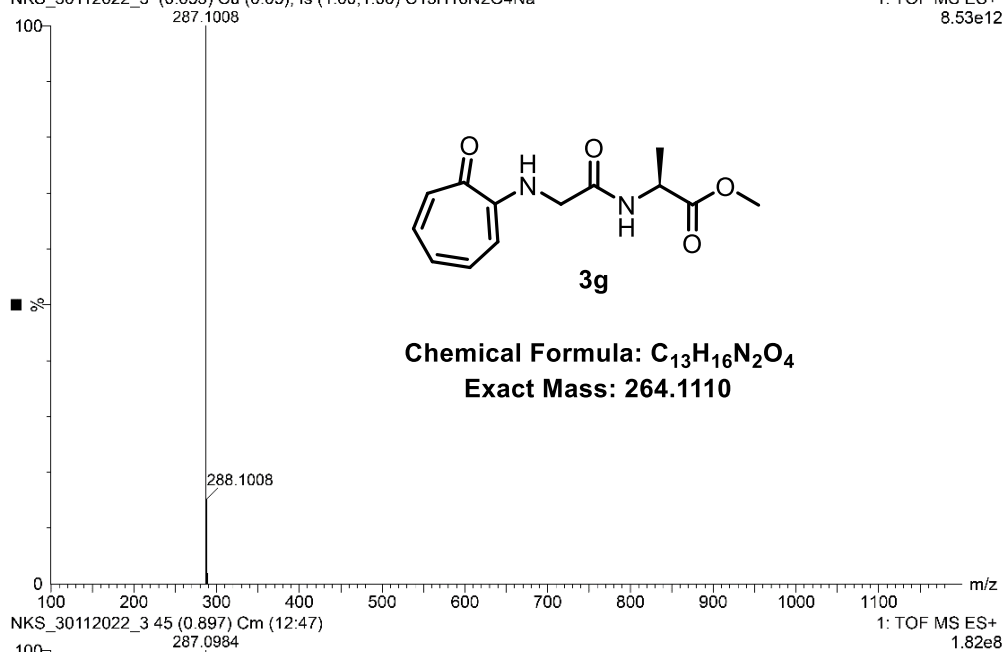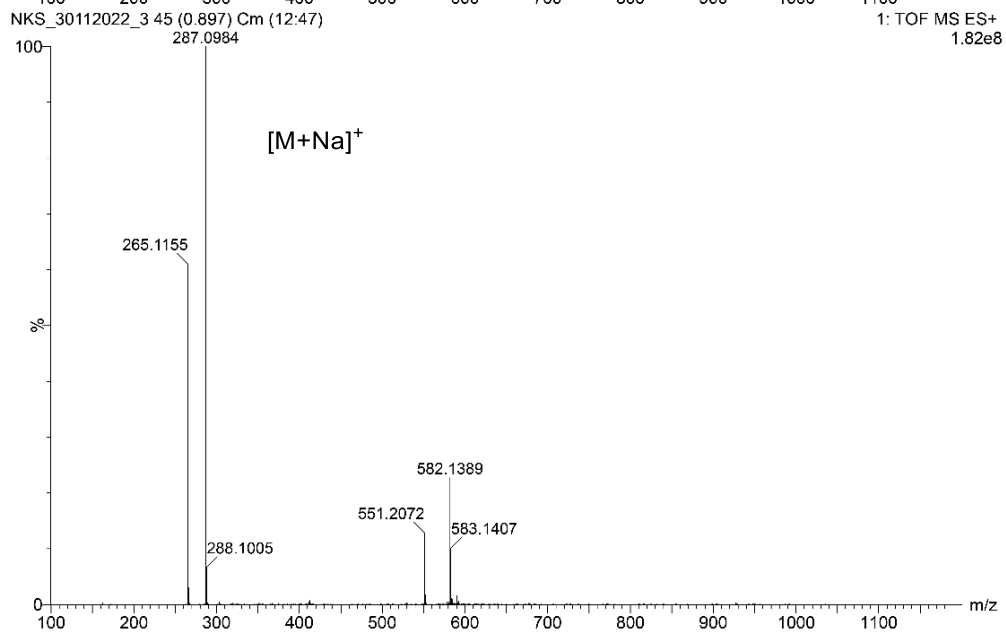

**Fig S16.** ESI-HRMS spectra of troponyl glycine derivative **3g**.

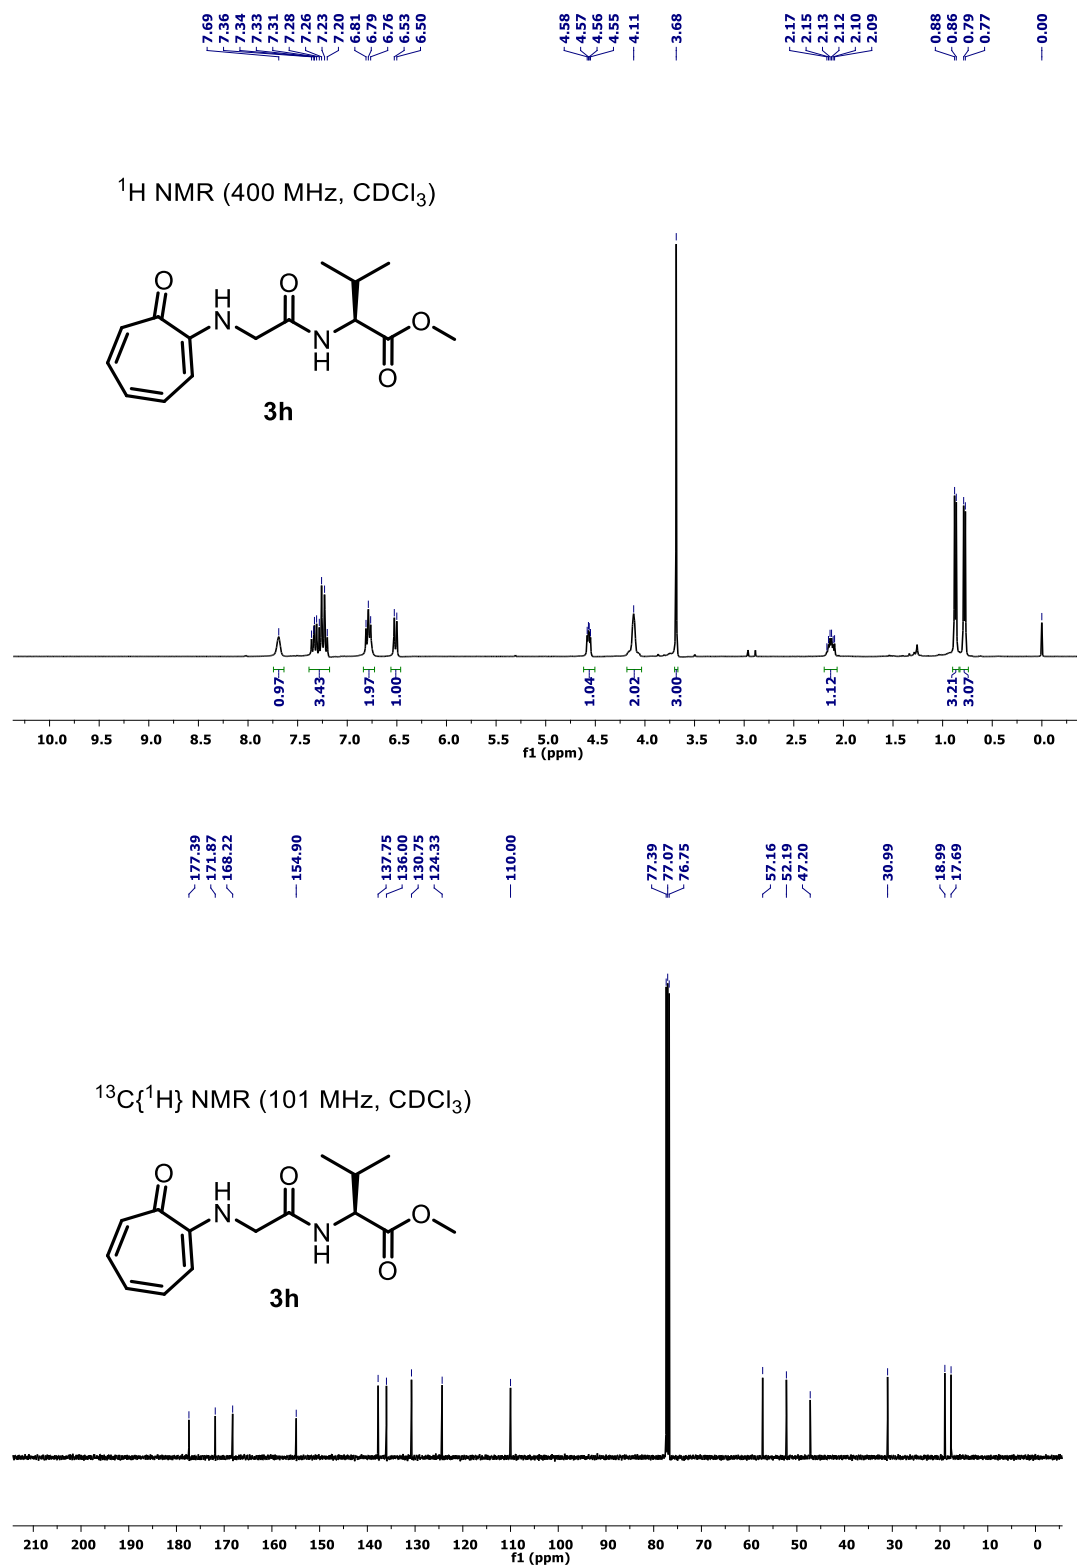

**Fig S17.** <sup>1</sup>H, <sup>13</sup>C {<sup>1</sup>H} NMR spectra of troponyl glycine derivative **3h**.

NKS\_CKJ\_1026

07-Dec-2022  
20:10:26

XEVO-G2XSQTOF#YFA1739

NKS\_07122022\_2 (0.053) Cu (0.05); Is (1.00,1.00) C<sub>15</sub>H<sub>20</sub>N<sub>2</sub>O<sub>4</sub>Na

1: TOF MS ES+  
8.35e12

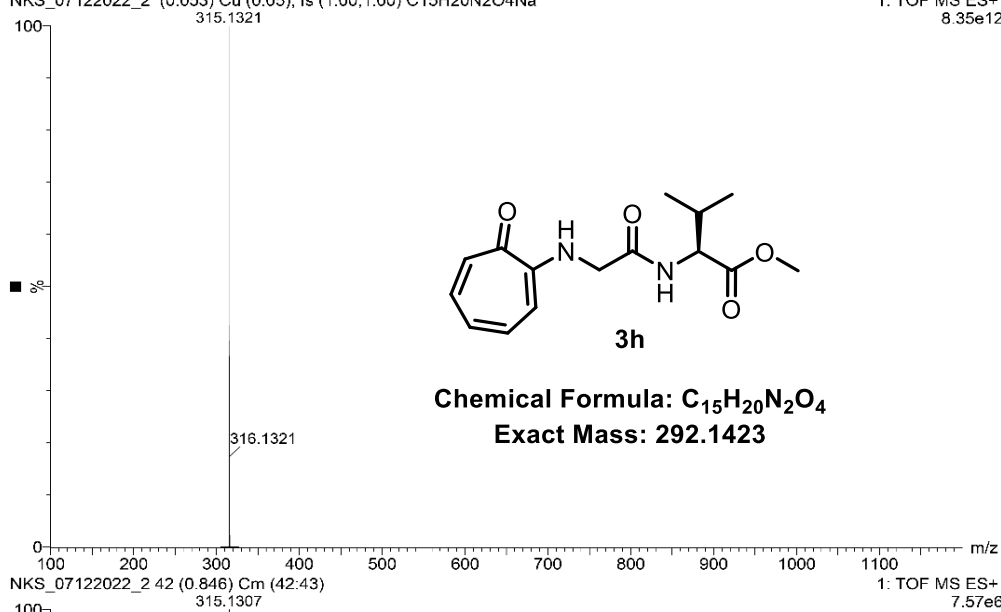

NKS\_07122022\_2 42 (0.846) Cm (42.43)

1: TOF MS ES+  
7.57e6

**Fig S18.** ESI-HRMS spectra of troponyl glycine derivative **3h**.

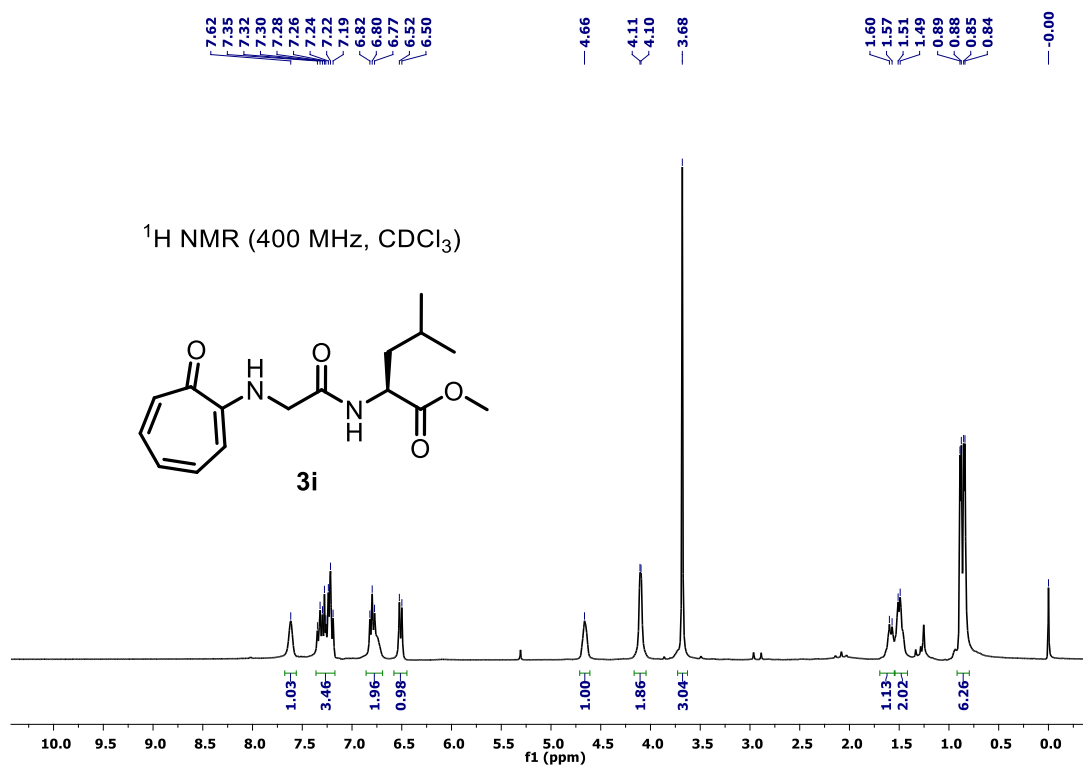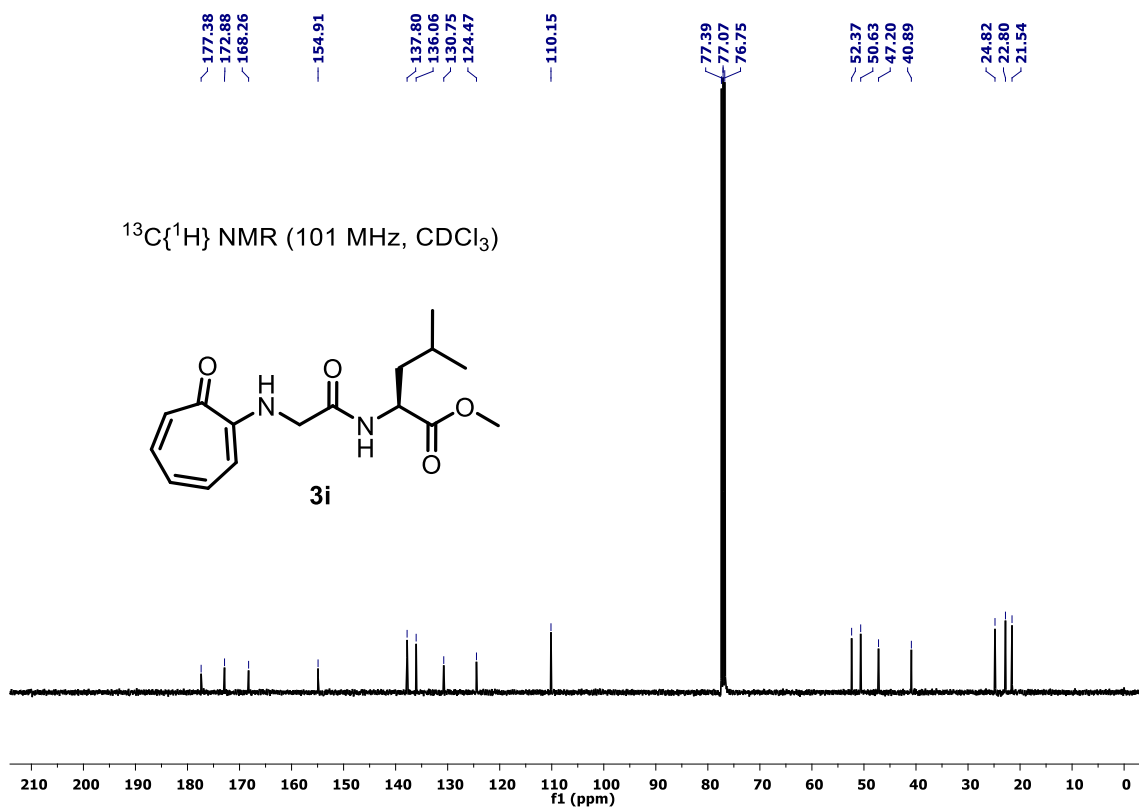

**Fig S19.** <sup>1</sup>H, <sup>13</sup>C {<sup>1</sup>H} NMR spectra of troponyl glycine derivative **3i**.

NKS\_CKJ\_1021

29-Nov-2022  
17:51:09

XEVO-G2XSQTOF#YFA1739

NKS\_29112022\_1 (0.053) Cu (0.05); Is (1.00,1.00) C<sub>16</sub>H<sub>23</sub>N<sub>2</sub>O<sub>4</sub>

1: TOF MS ES+  
8.25e12

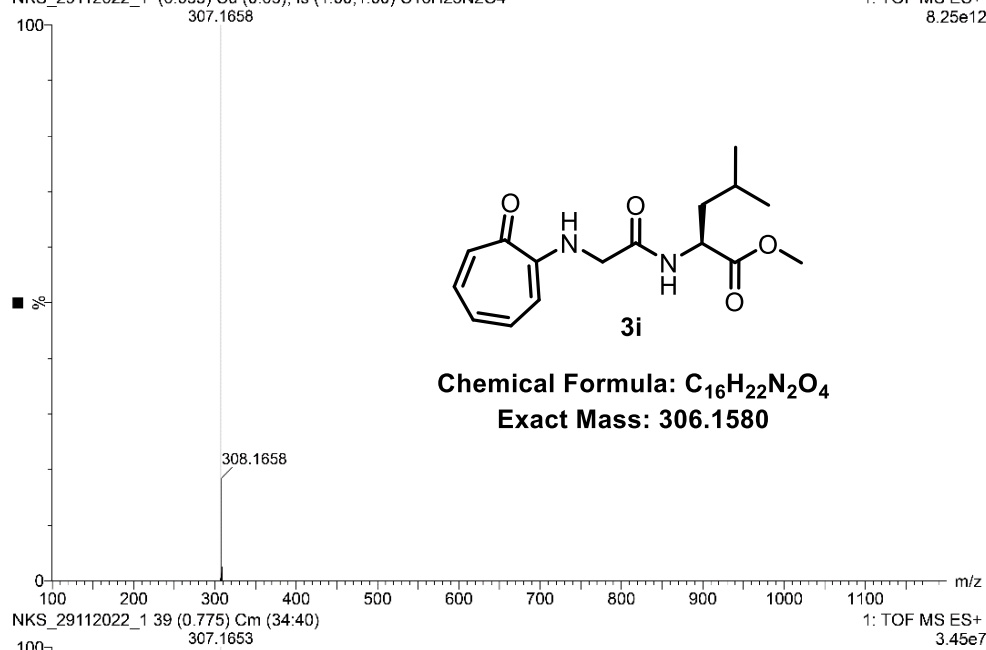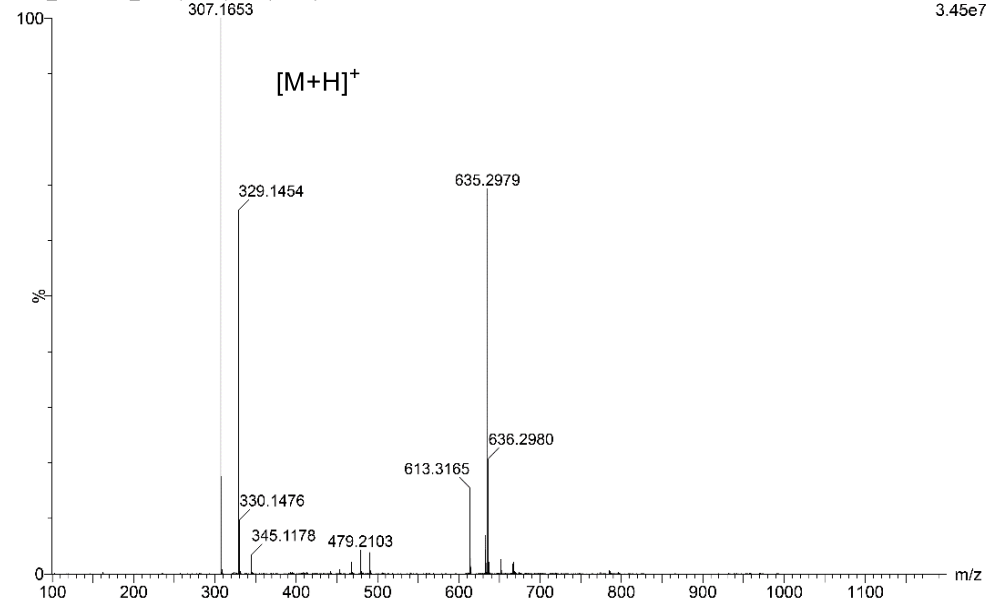

**Fig S20.** ESI-HRMS spectra of troponyl glycine derivative **3i**.

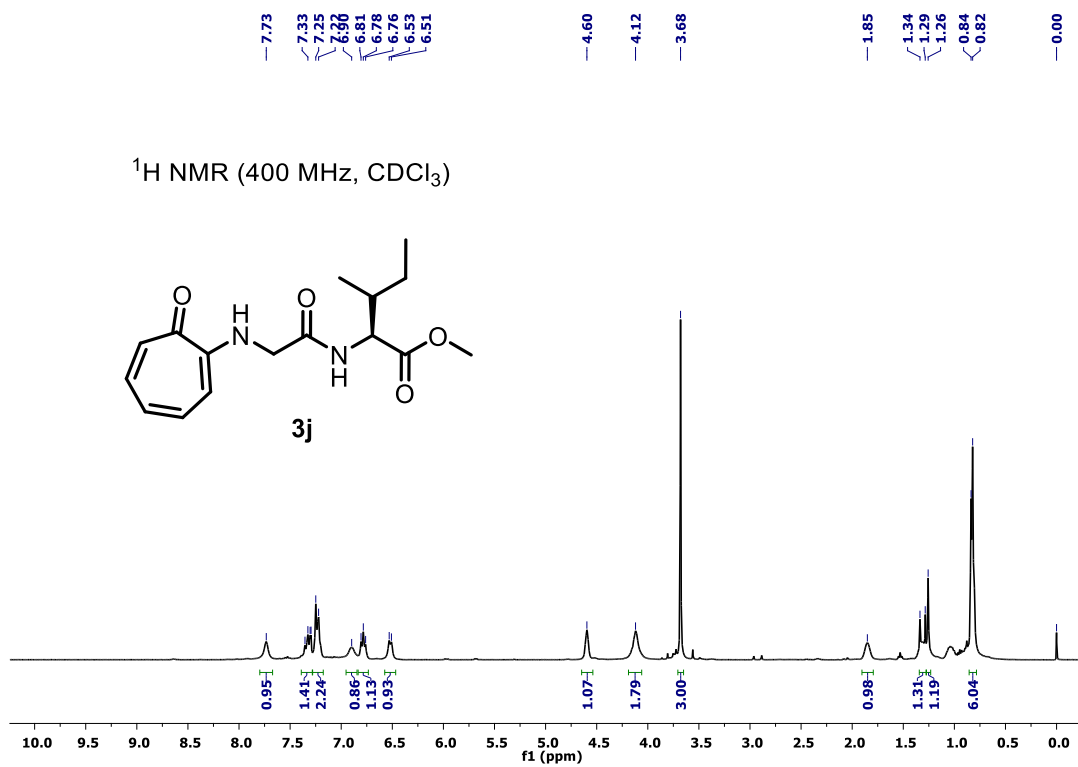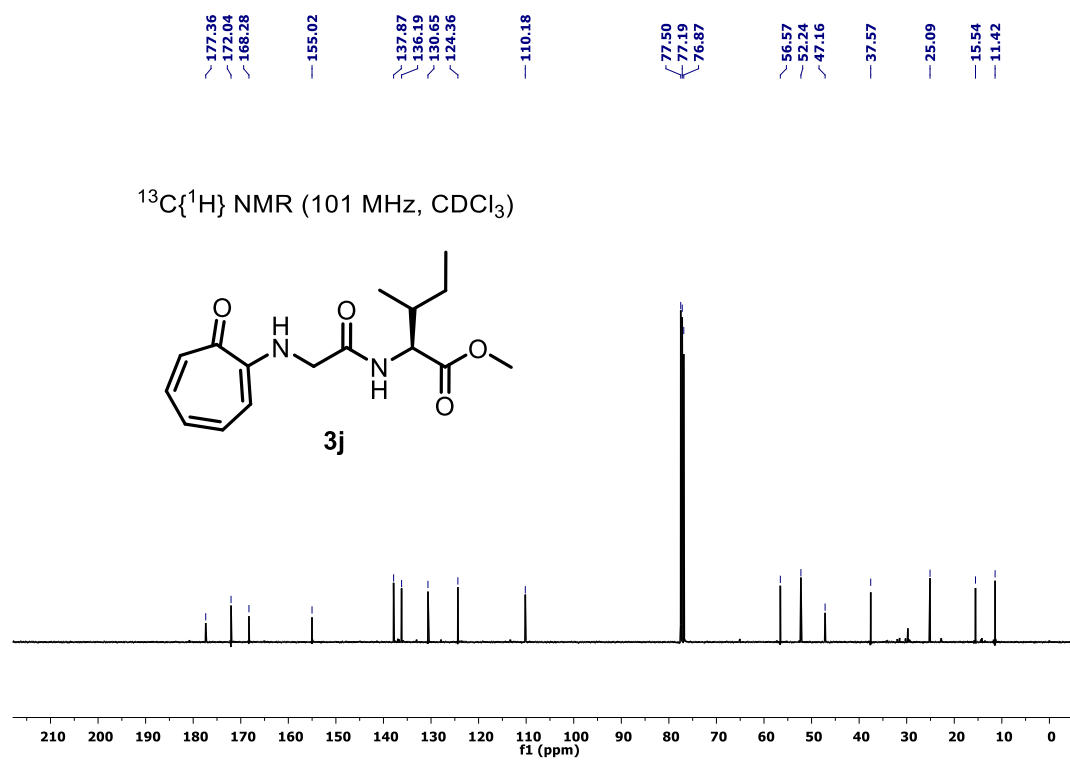

**Fig S21.** <sup>1</sup>H, <sup>13</sup>C {<sup>1</sup>H} NMR spectra of troponyl glycine derivative **3j**.

NKS\_CKJ\_1022

03-Dec-2022  
23:44:19

XEVO-G2XSQTOF#YFA1739

NKS\_03122022\_2 (0.054) Cu (0.05); Is (1.00,1.00) C<sub>16</sub>H<sub>23</sub>N<sub>2</sub>O<sub>4</sub>

1: TOF MS ES+  
8.25e12

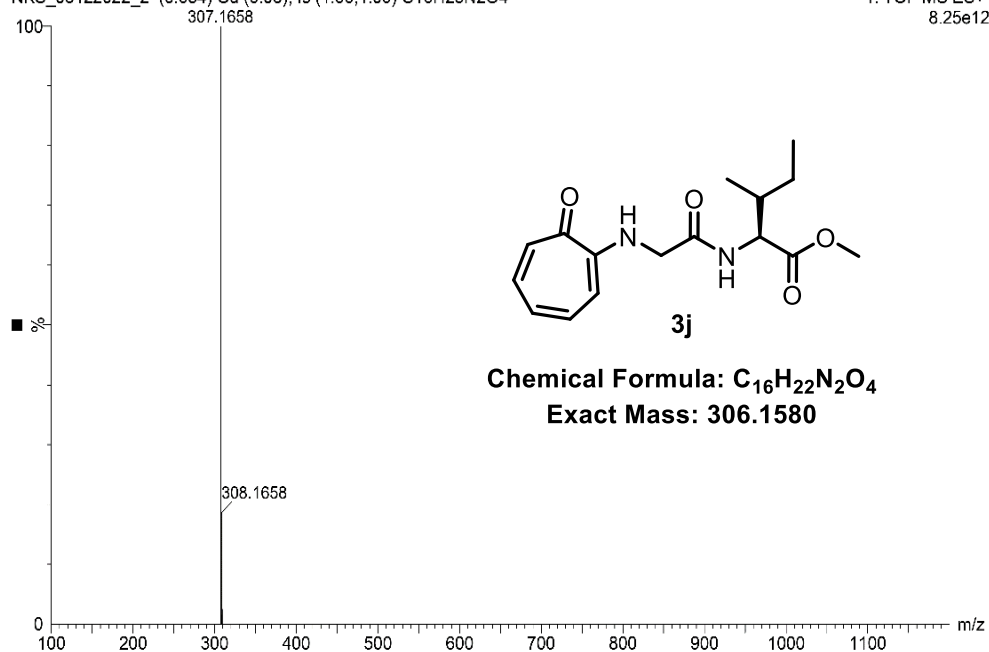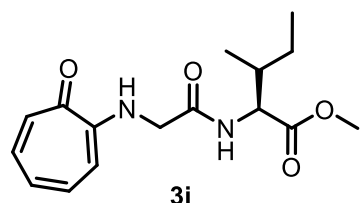

**Chemical Formula: C<sub>16</sub>H<sub>22</sub>N<sub>2</sub>O<sub>4</sub>**  
**Exact Mass: 306.1580**

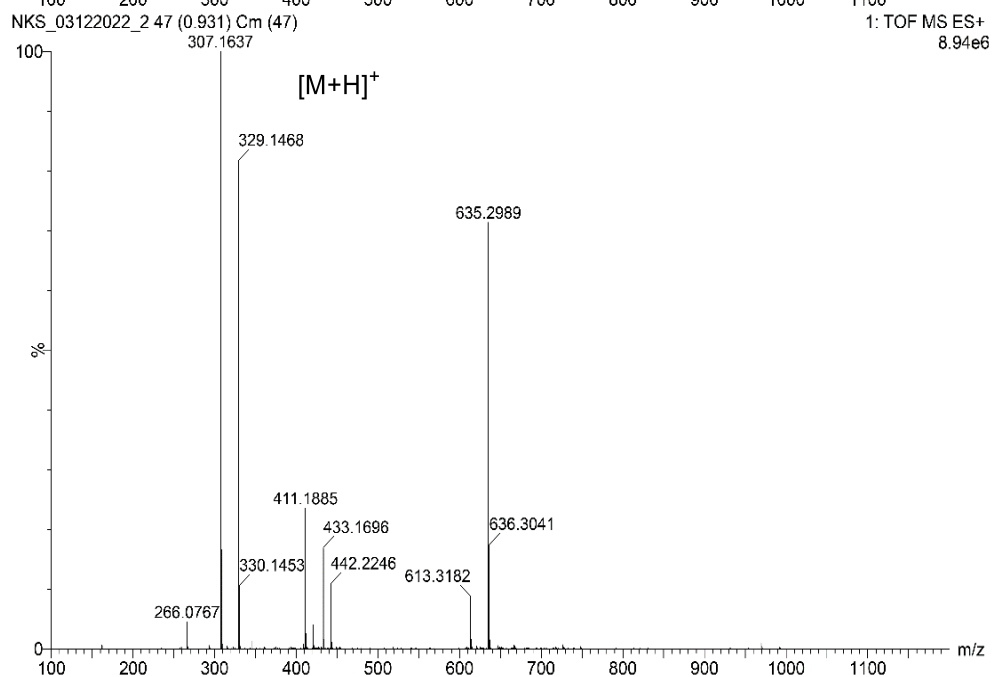

**Fig S22.** ESI-HRMS spectra of troponyl glycine derivative **3j**.

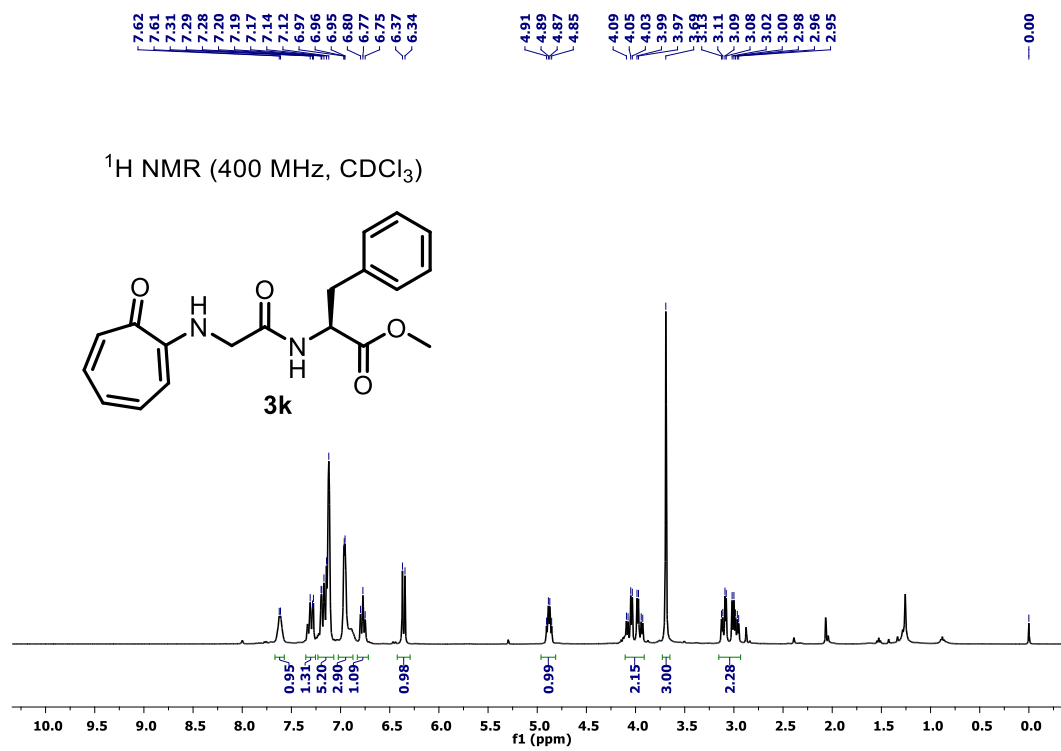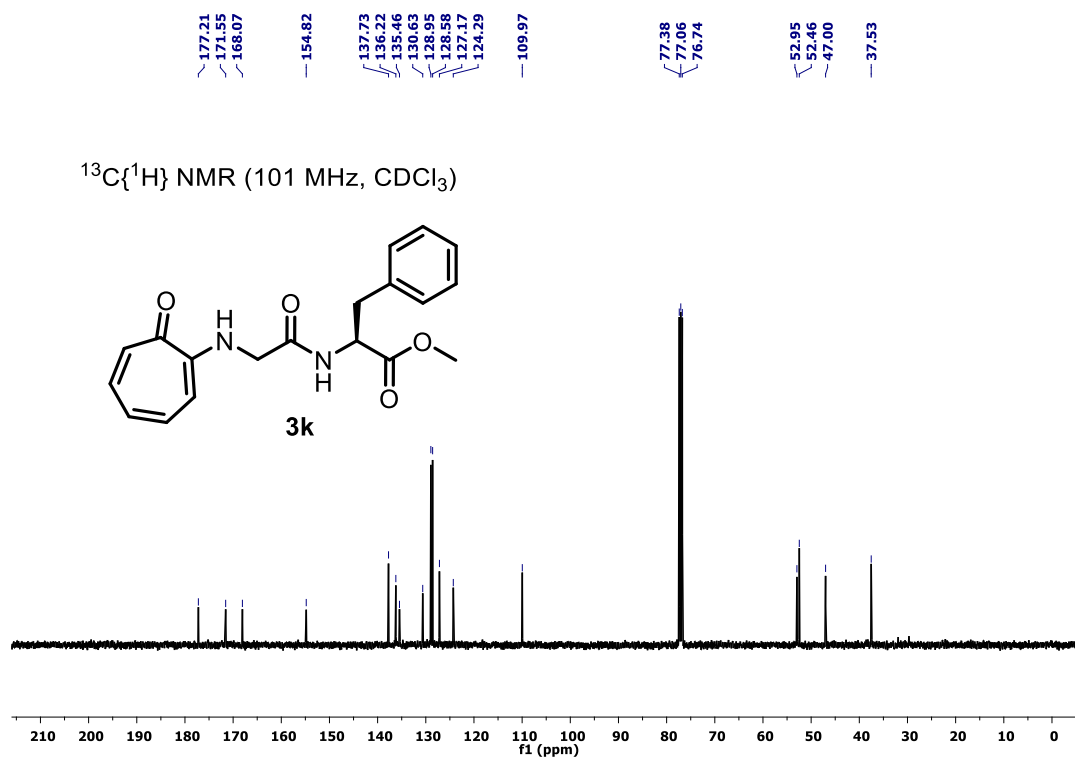

Fig S23. <sup>1</sup>H, <sup>13</sup>C {<sup>1</sup>H} NMR spectra of troponyl glycine derivative **3k**.



## Display Report

### Analysis Info

Analysis Name D:\Data\JULY-2021\NKS\17072021\_-NKS-CKJ-331.d  
Method Pos\_tune\_low\_05122019.m  
Sample Name Tmix-131118  
Comment

Acquisition Date 7/17/2021 4:13:18 PM

Operator Amit S.Sahu  
Instrument micrOTOF-Q II 10337

### Acquisition Parameter

|             |            |                       |           |                  |           |
|-------------|------------|-----------------------|-----------|------------------|-----------|
| Source Type | ESI        | Ion Polarity          | Positive  | Set Nebulizer    | 0.5 Bar   |
| Focus       | Not active | Set Capillary         | 4500 V    | Set Dry Heater   | 180 °C    |
| Scan Begin  | 50 m/z     | Set End Plate Offset  | -500 V    | Set Dry Gas      | 4.0 l/min |
| Scan End    | 3000 m/z   | Set Collision Cell RF | 130.0 Vpp | Set Divert Valve | Waste     |

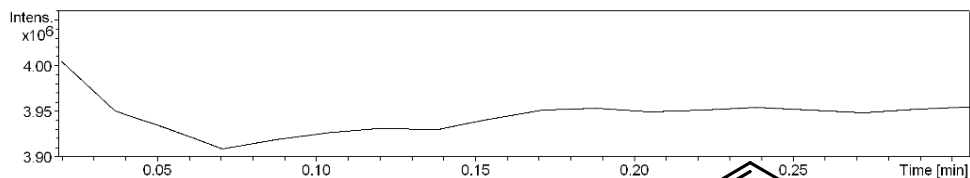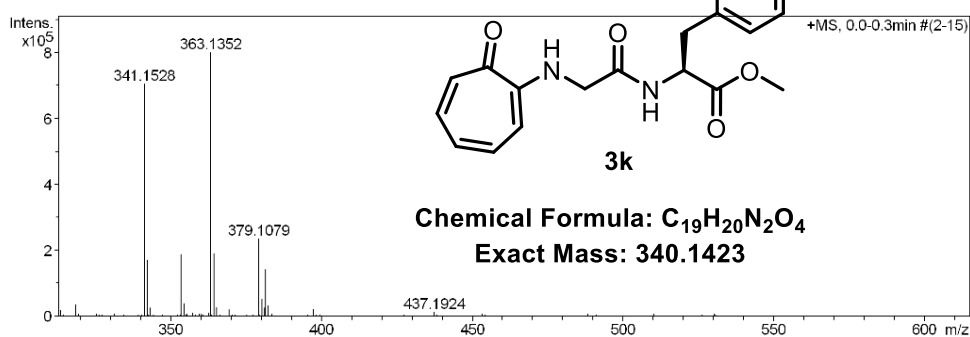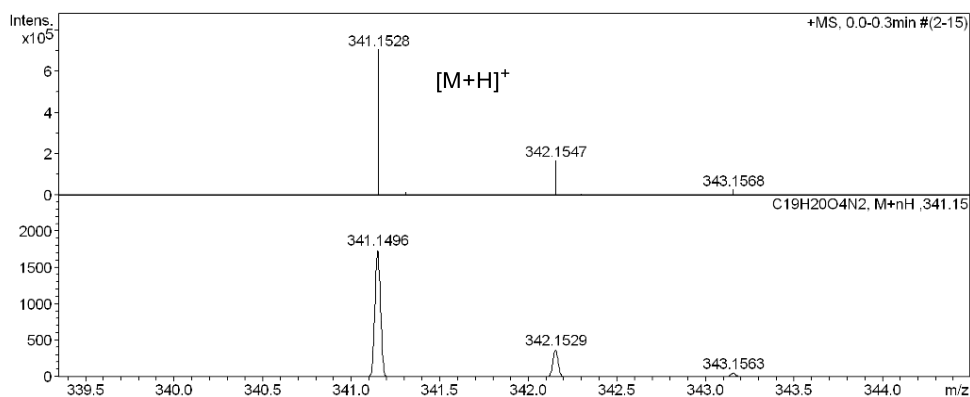

**Fig S24.** ESI-HRMS spectra of troponyl glycine derivative **3k**.

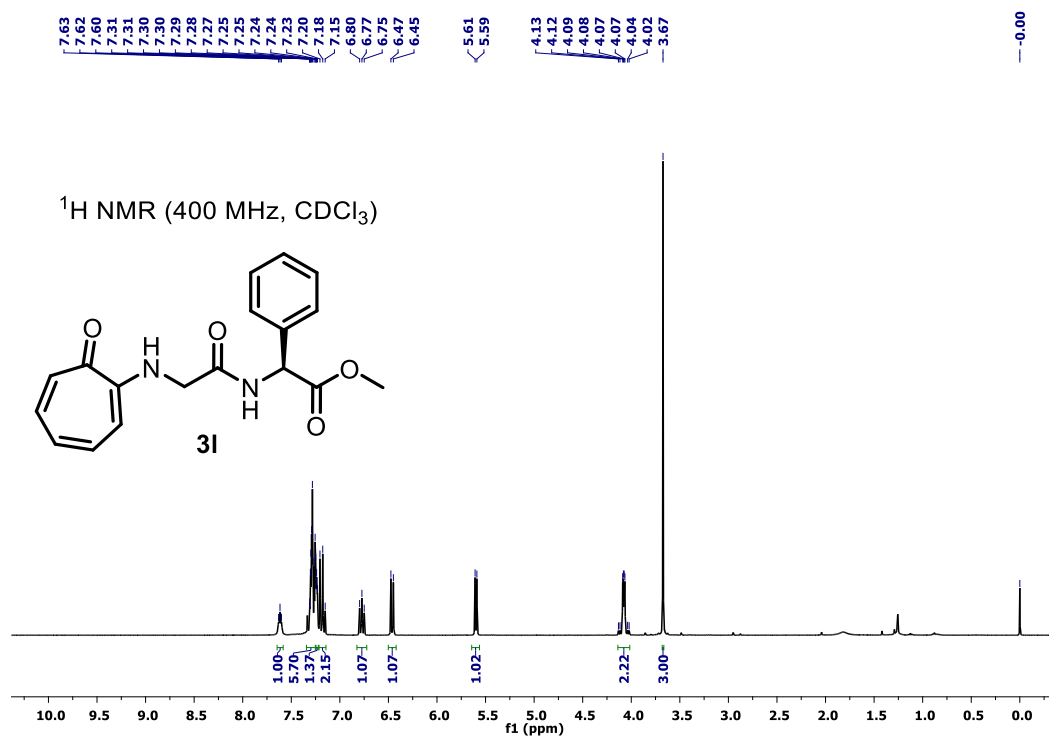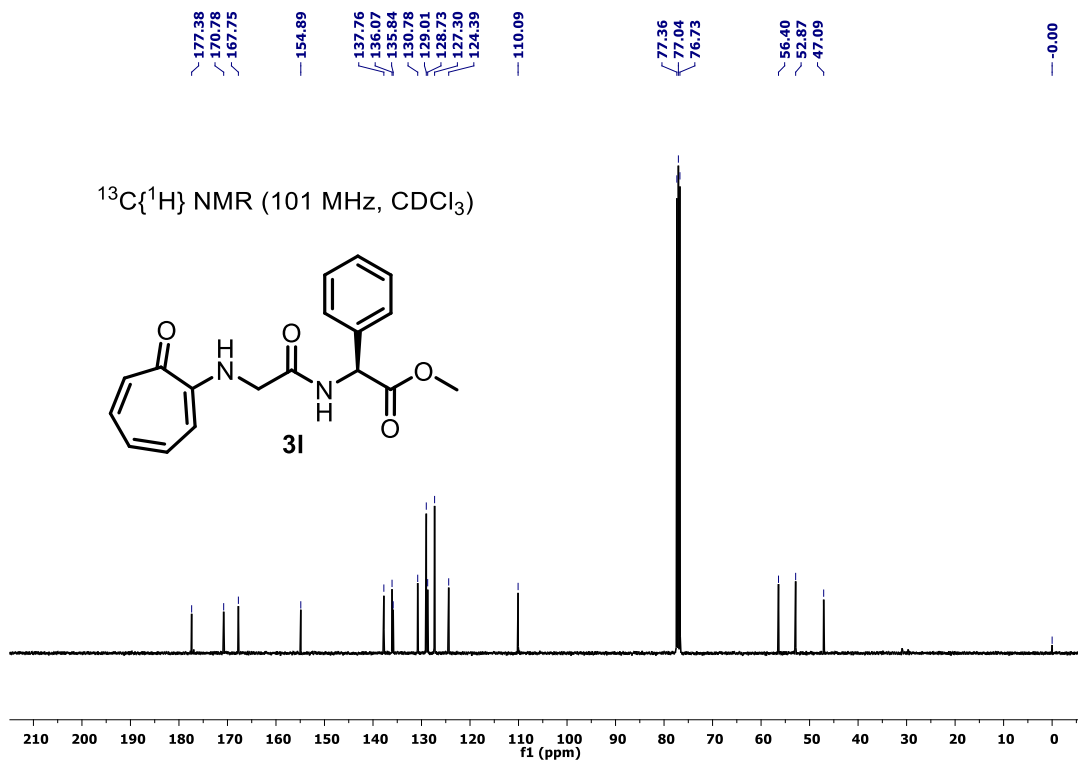

**Fig S25.** <sup>1</sup>H, <sup>13</sup>C {<sup>1</sup>H} NMR spectra of troponyl glycine derivative **3I**.

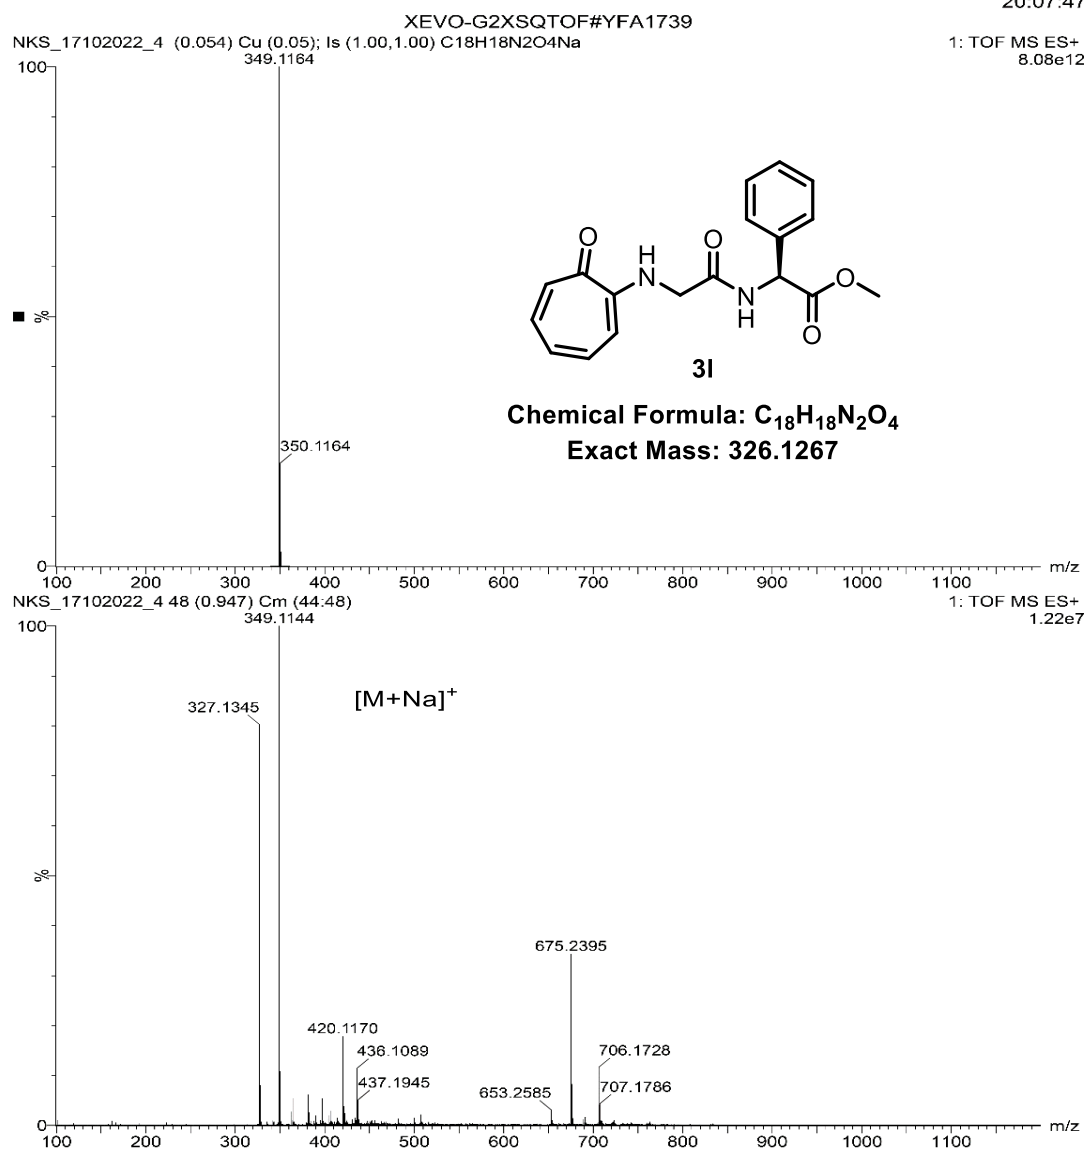

**Fig S26.** ESI-HRMS spectra of troponyl glycine derivative **3I**.

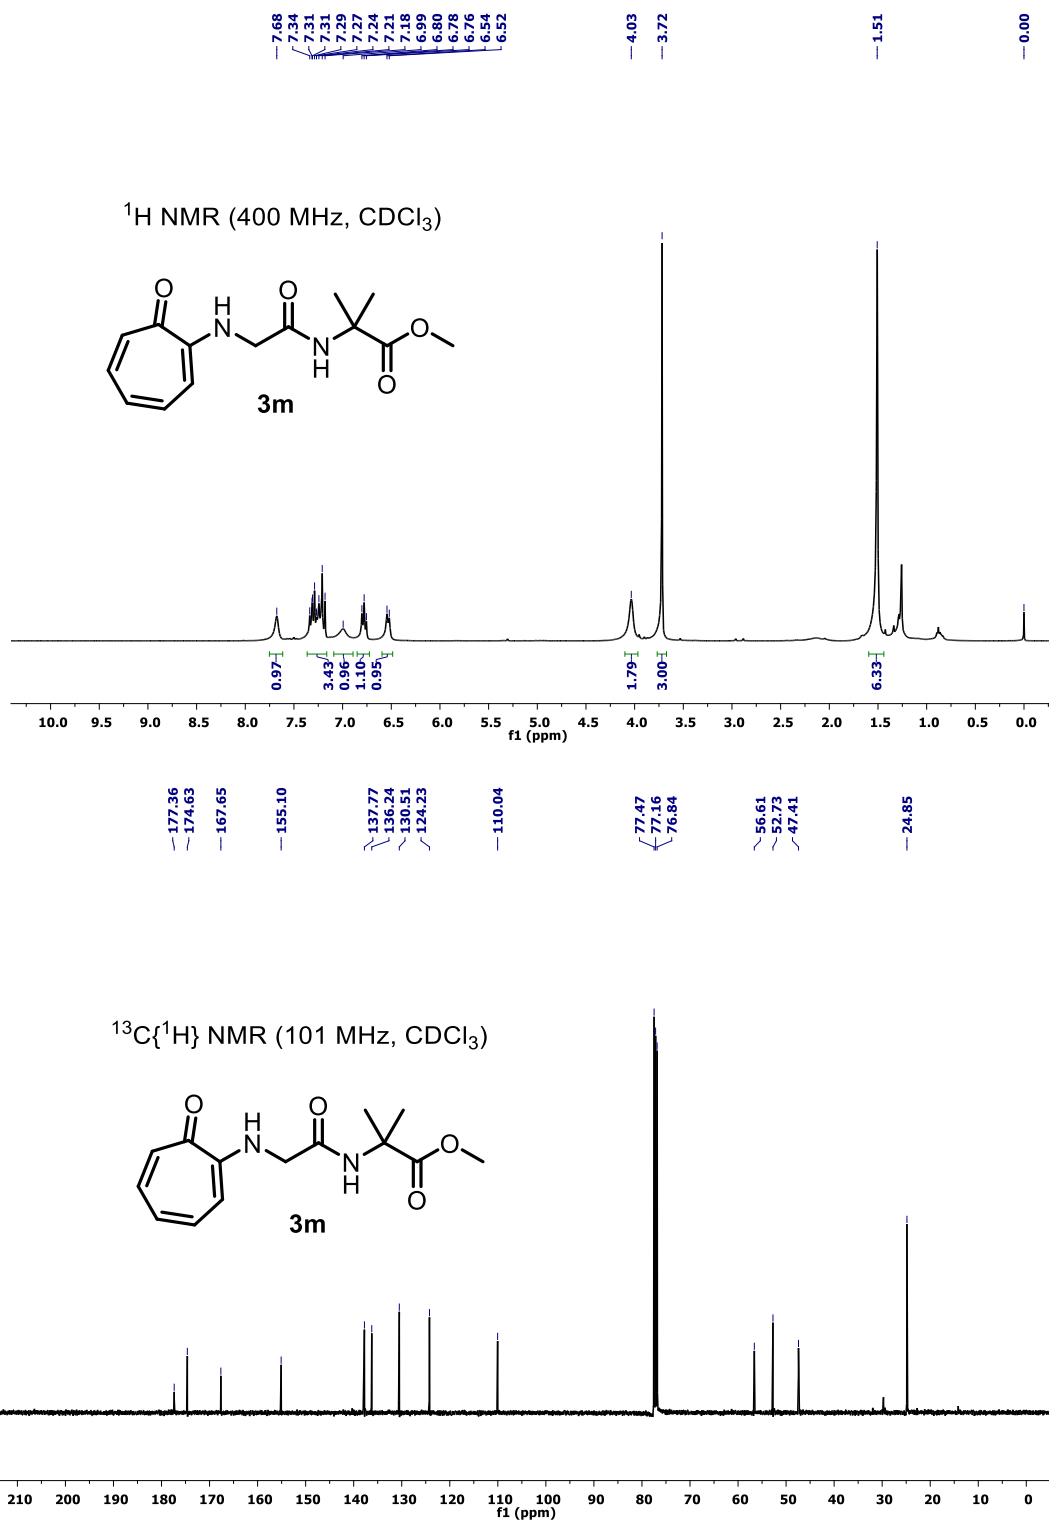

**Fig S27.** <sup>1</sup>H, <sup>13</sup>C {<sup>1</sup>H} NMR spectra of troponyl glycine derivative **3m**.

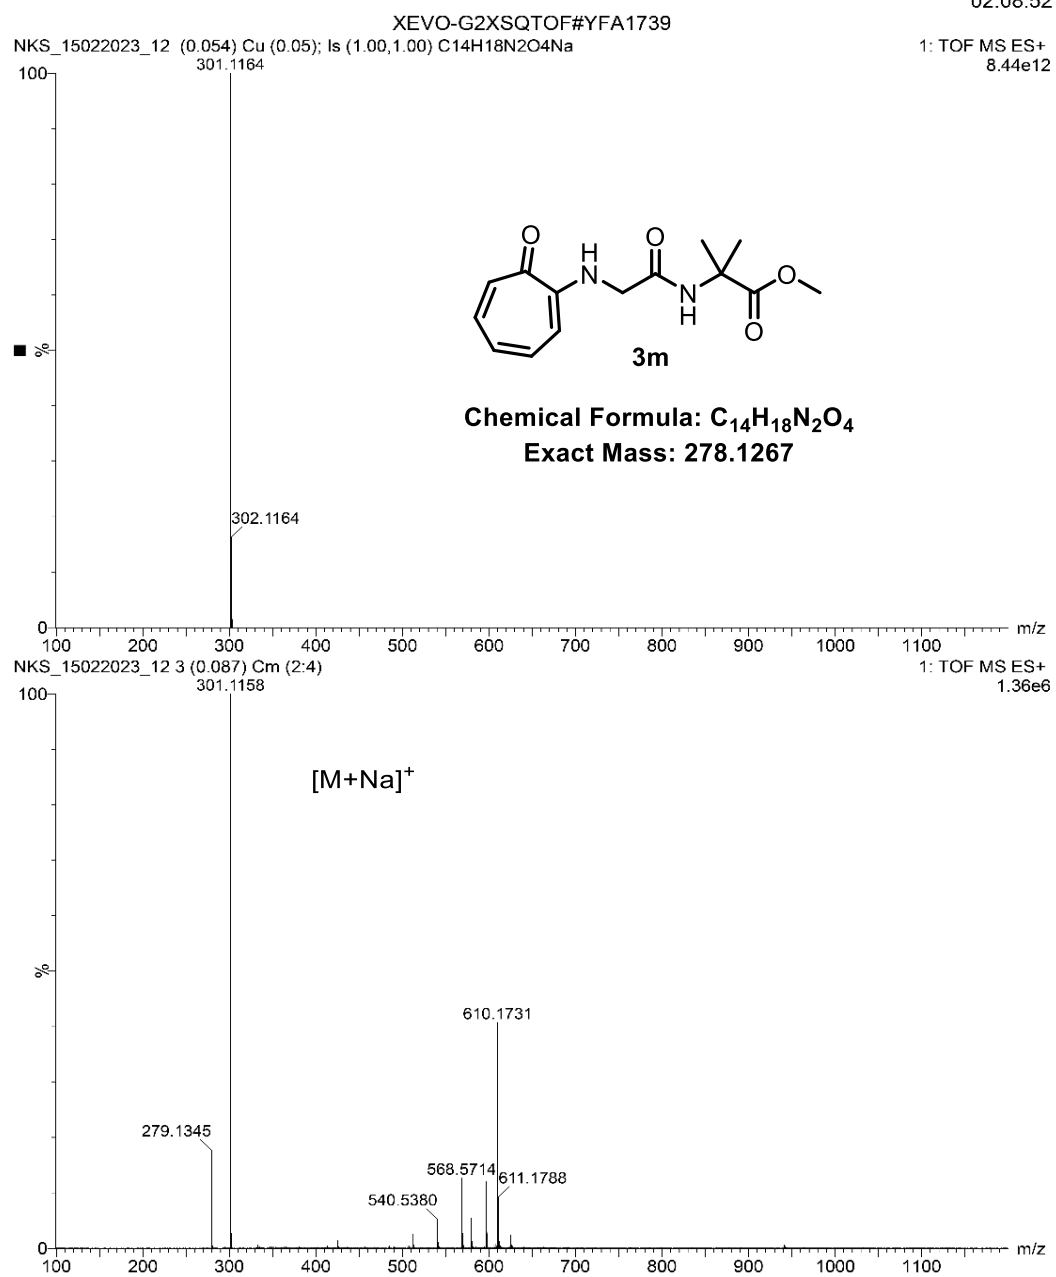

**Fig S28.** ESI-HRMS spectra of troponyl glycine derivative **3m**.

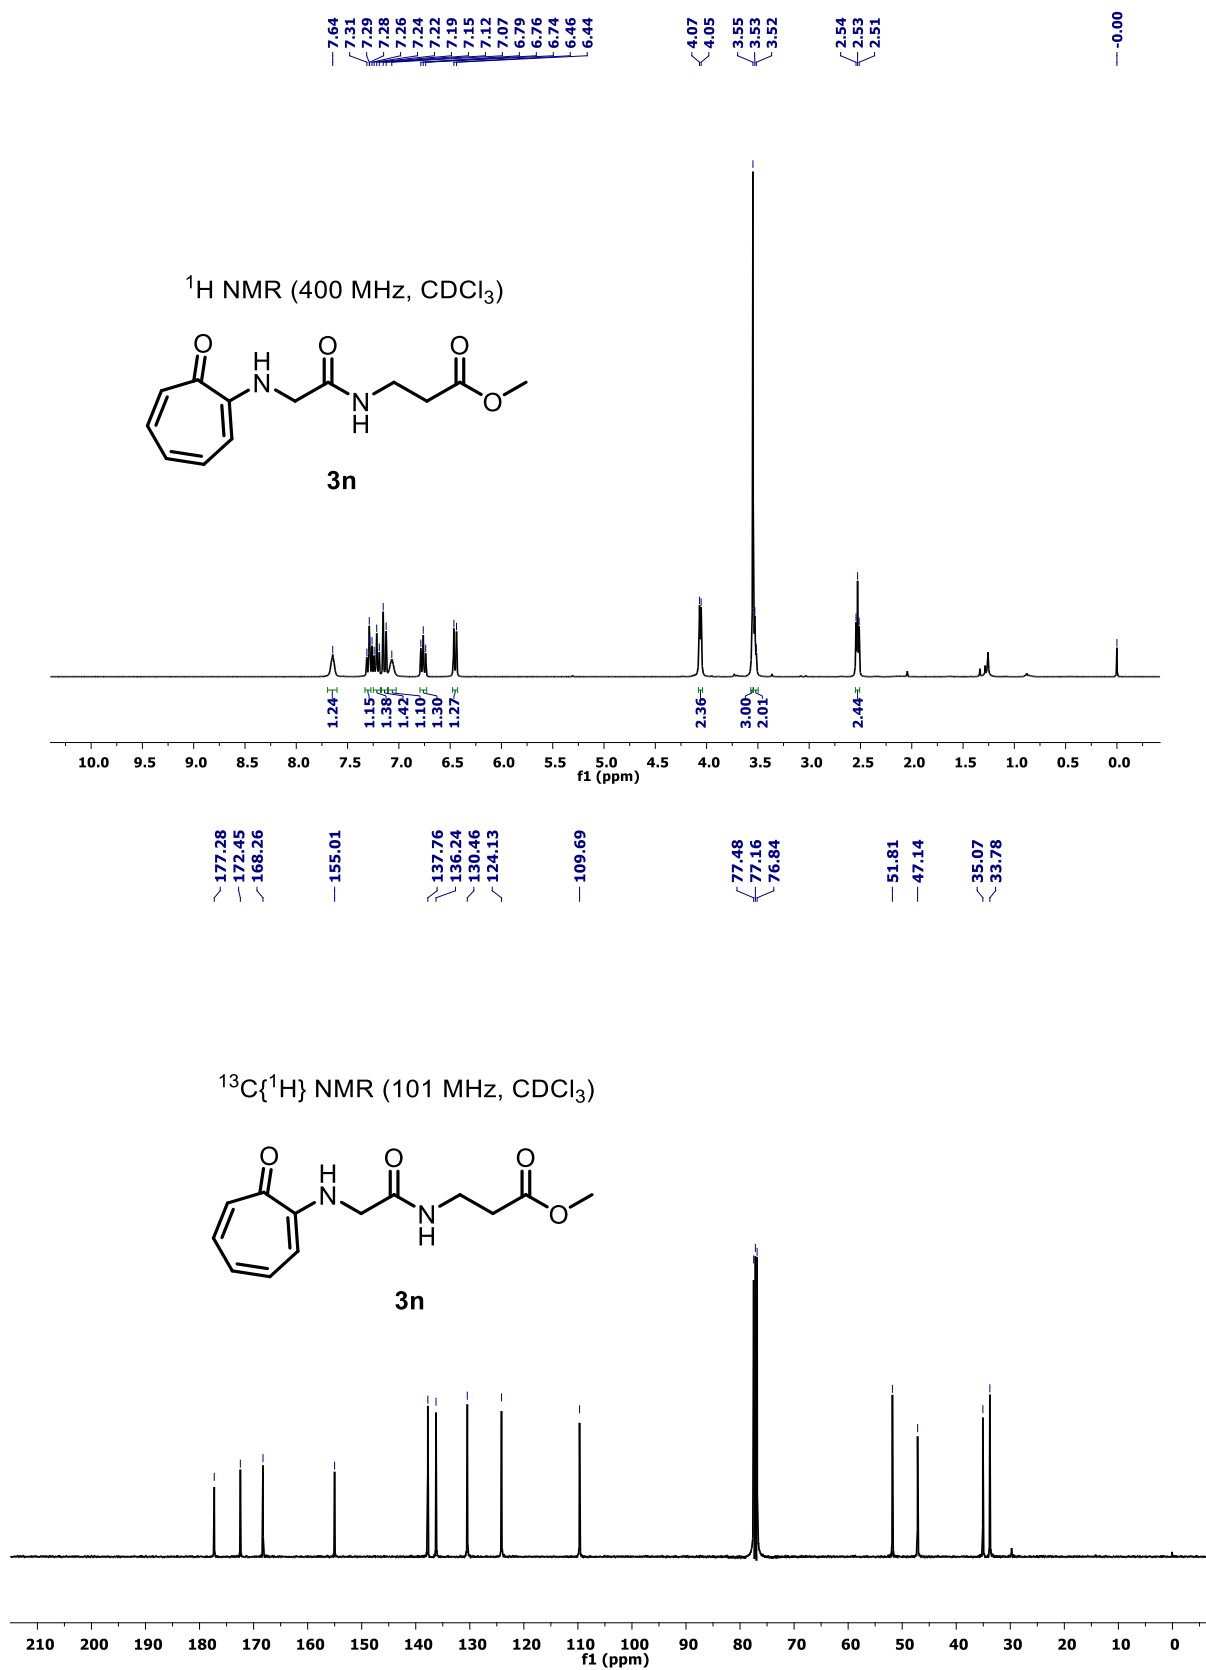

**Fig S29.** <sup>1</sup>H, <sup>13</sup>C {<sup>1</sup>H} NMR spectra of troponyl glycine derivative **3n**.

NKS\_CKJ\_1025 A

04-Dec-2022  
00:42:46

XEVO-G2XSQTOF#YFA1739

NKS\_03122022\_8 (0.053) Cu (0.05); Is (1.00,1.00) C<sub>13</sub>H<sub>16</sub>N<sub>2</sub>O<sub>4</sub>Na

1: TOF MS ES+  
8.53e12

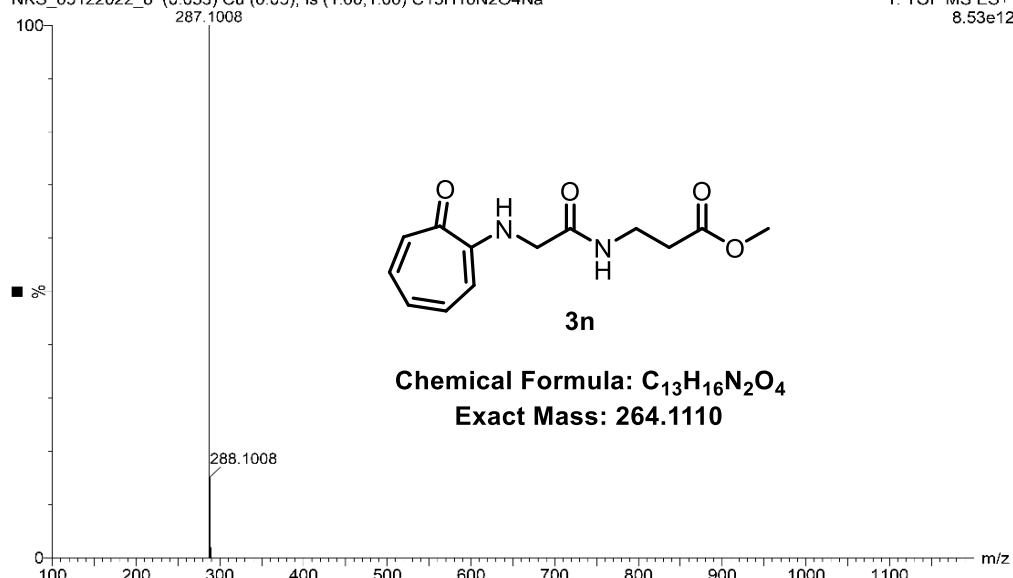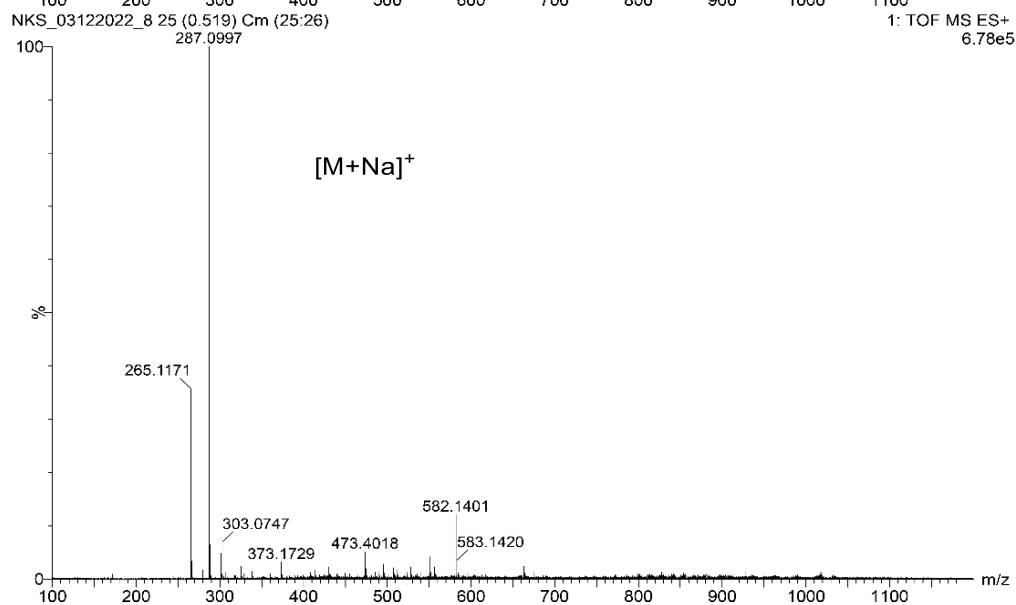

**Fig S30.** ESI-HRMS spectra of troponyl glycine derivative **3n**.

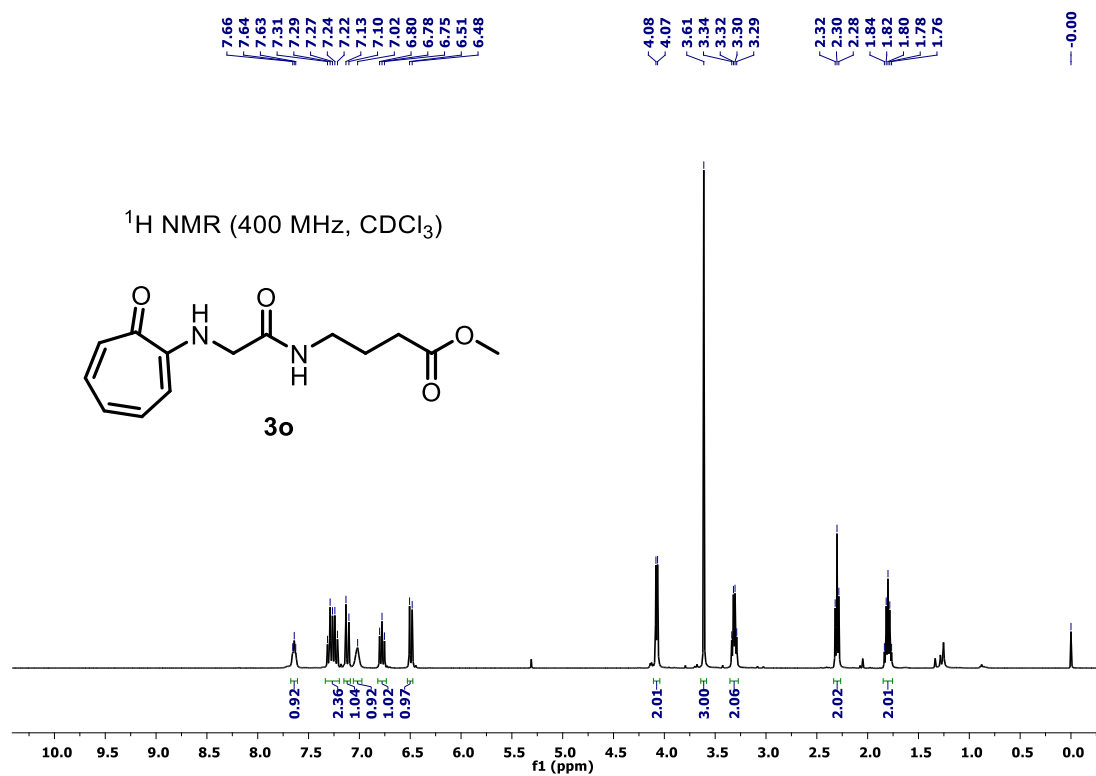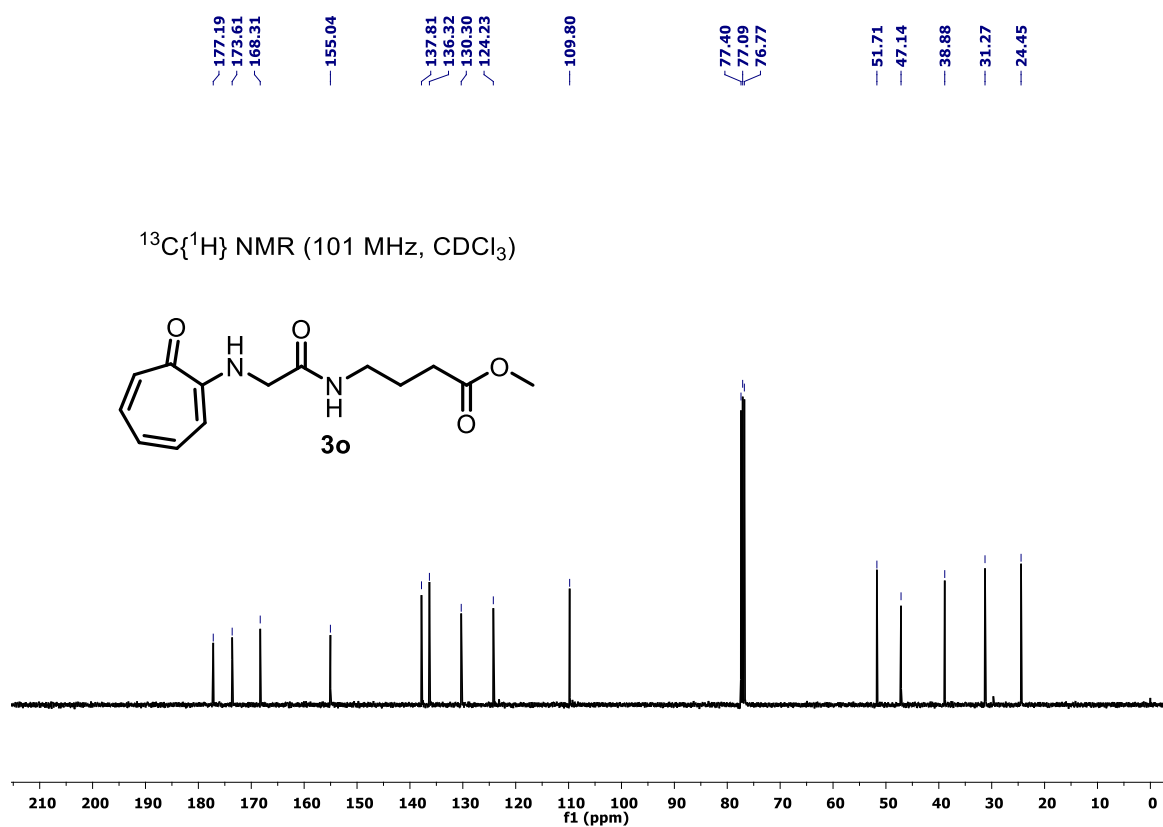

**Fig S31.** <sup>1</sup>H, <sup>13</sup>C {<sup>1</sup>H} NMR spectra of troponyl glycine derivative **3o**.



NKS\_CKJ\_1023 A

04-Dec-2022  
00:08:18

XEVO-G2XSQTOF#YFA1739

NKS\_03122022\_5 (0.053) Cu (0.05); Is (1.00,1.00) C<sub>14</sub>H<sub>18</sub>N<sub>2</sub>O<sub>4</sub>Na

1: TOF MS ES+  
8.44e12

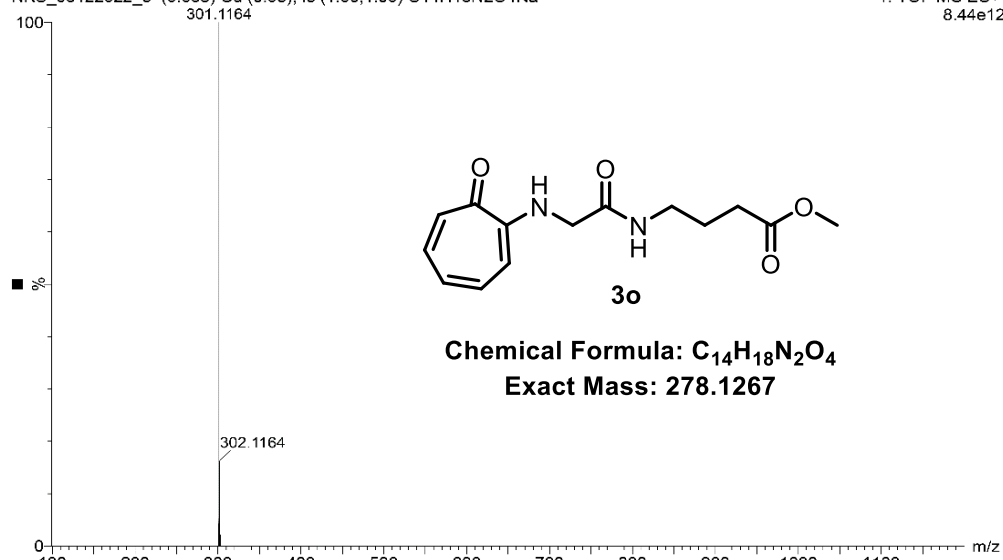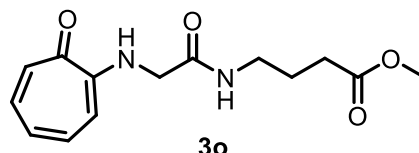

Chemical Formula: C<sub>14</sub>H<sub>18</sub>N<sub>2</sub>O<sub>4</sub>  
Exact Mass: 278.1267

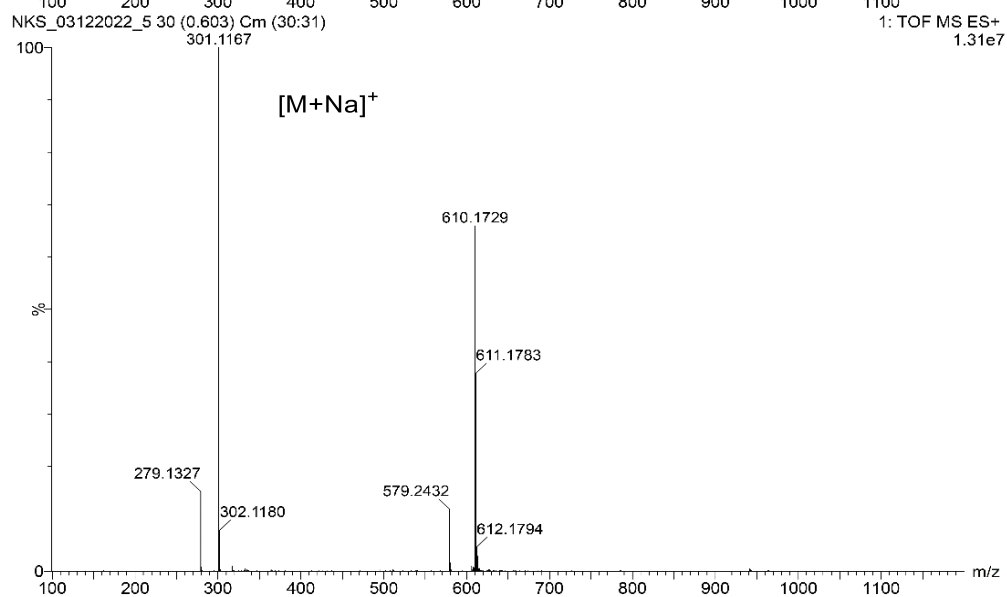

**Fig S32.** ESI-HRMS spectra of troponyl glycine derivative **3o**.

## 2. NMR and Mass Spectra of Oxidized Troponyl Glycine Derivatives (2a/ 4a-4o)

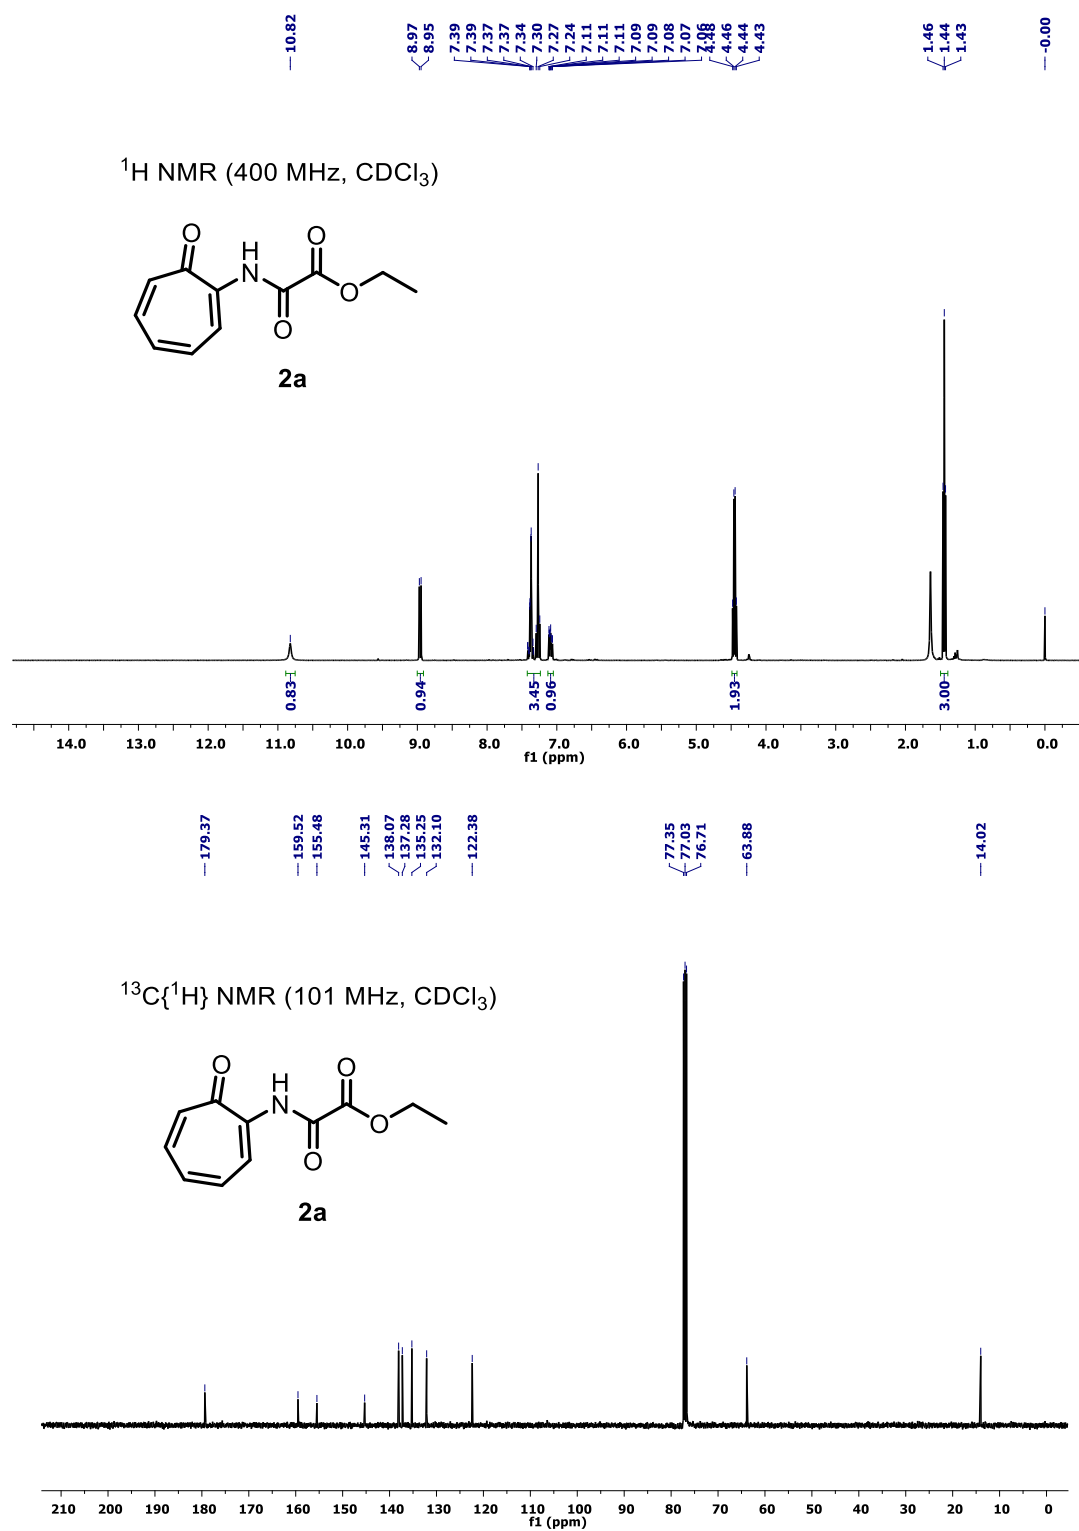

Fig S33. <sup>1</sup>H, <sup>13</sup>C {<sup>1</sup>H} NMR spectra of oxidized troponyl glycine derivative **2a**.

NKS-CKJ-880

17-Oct-2022  
18:58:06

XEVO-G2XSQTOF#YFA1739

NKS\_17102022\_1 (0.053) Cu (0.05); Is (1.00,1.00) C<sub>11</sub>H<sub>11</sub>NO<sub>4</sub>Na

1: TOF MS ES+  
8.75e12

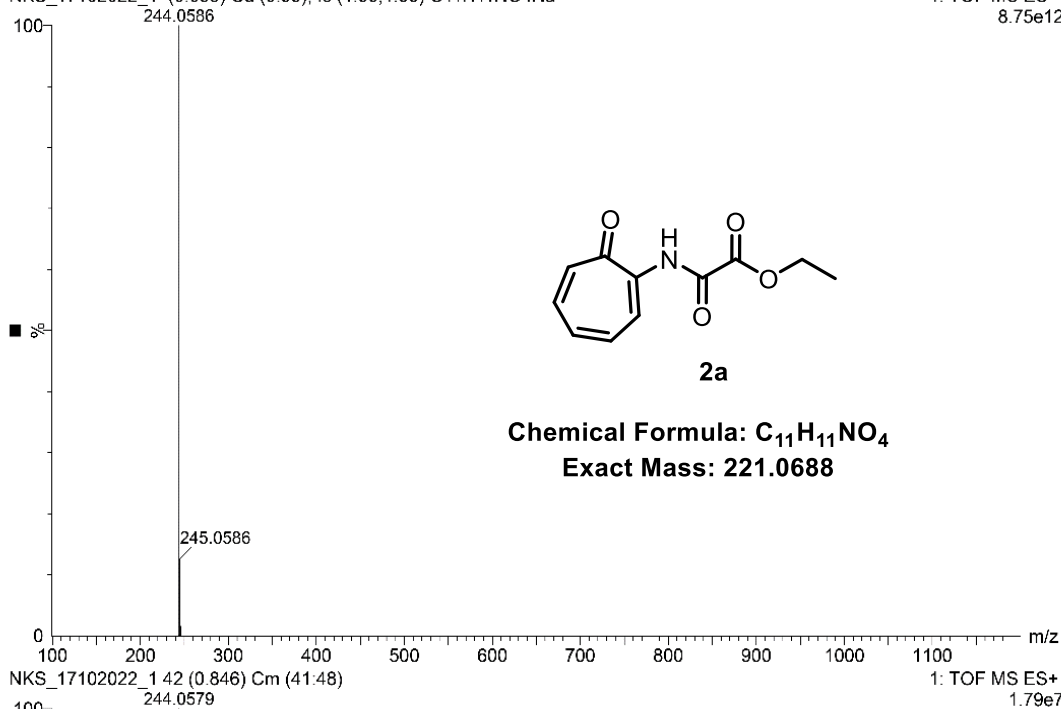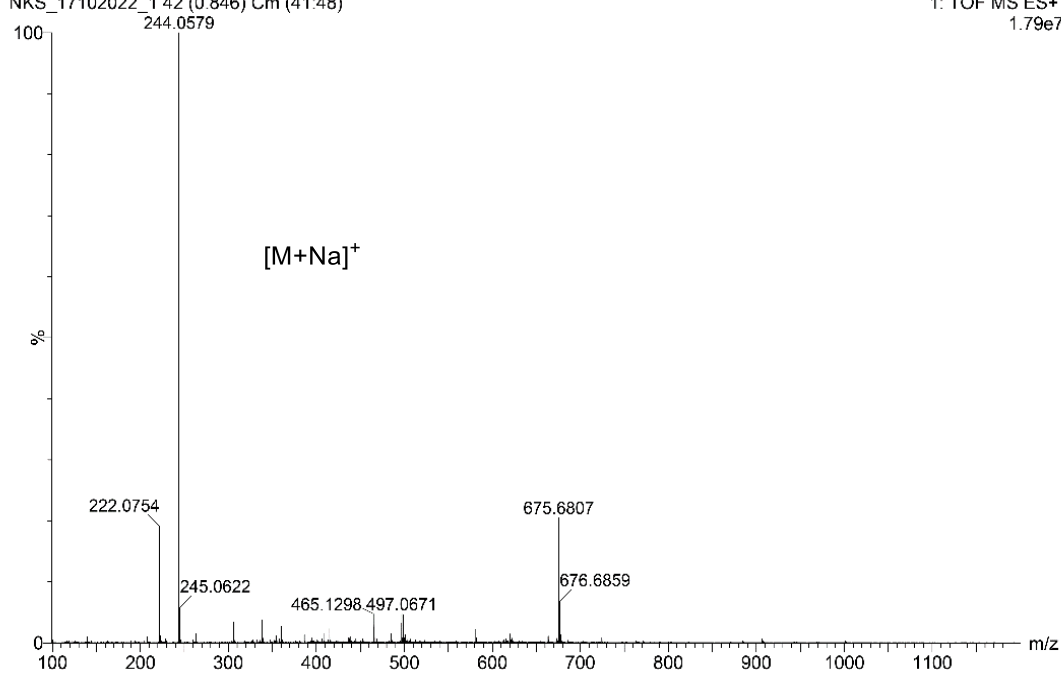

**Fig S34.** ESI-HRMS spectra of oxidized troponyl glycine derivative **2a**.

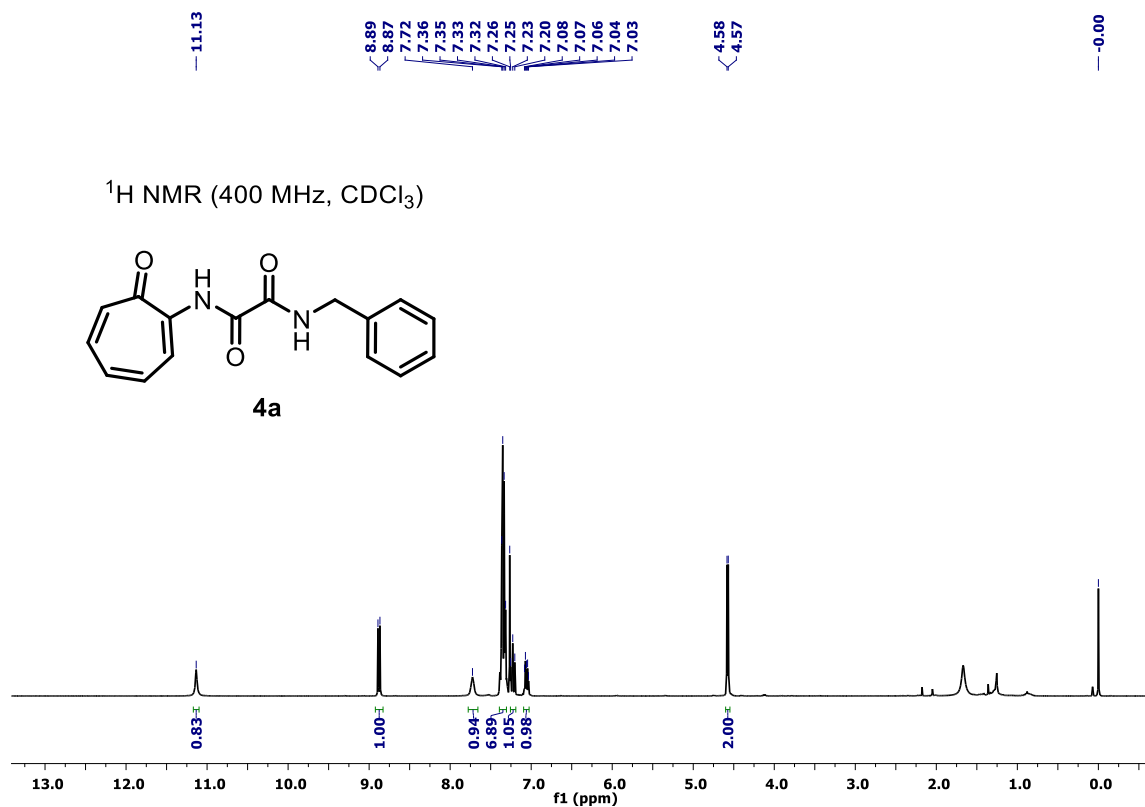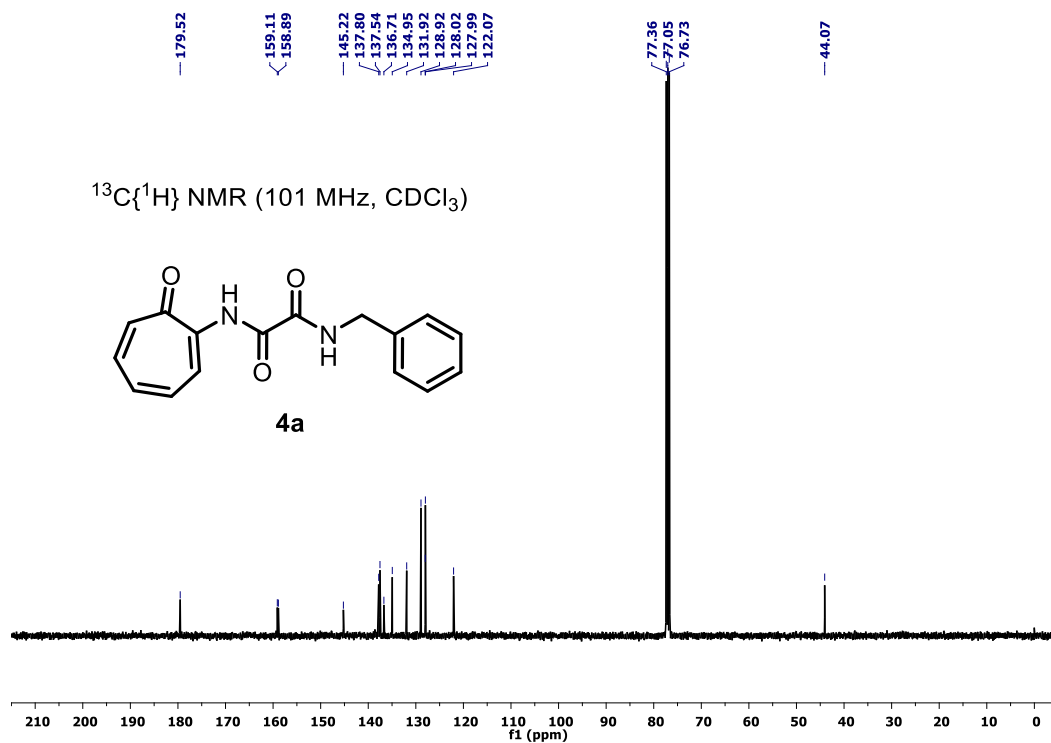

**Fig S35.** <sup>1</sup>H, <sup>13</sup>C {<sup>1</sup>H} NMR spectra of oxidized troponyl glycine derivative **4a**.

NKS\_CKJ\_988 A

21-Oct-2022  
17:44:55

XEVO-G2XSQTOF#YFA1739

NKS\_21102022\_13 (0.053) Cu (0.05); Is (1.00,1.00) C<sub>16</sub>H<sub>14</sub>N<sub>2</sub>O<sub>3</sub>Na

1: TOF MS ES+  
8.28e12

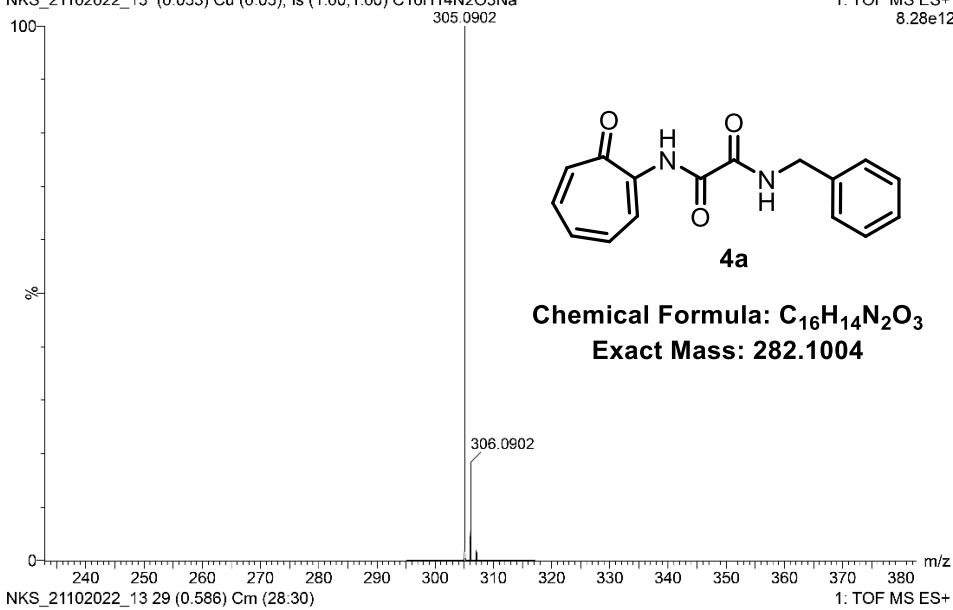

NKS\_21102022\_13 29 (0.586) Cm (28.30)

1: TOF MS ES+  
1.43e7

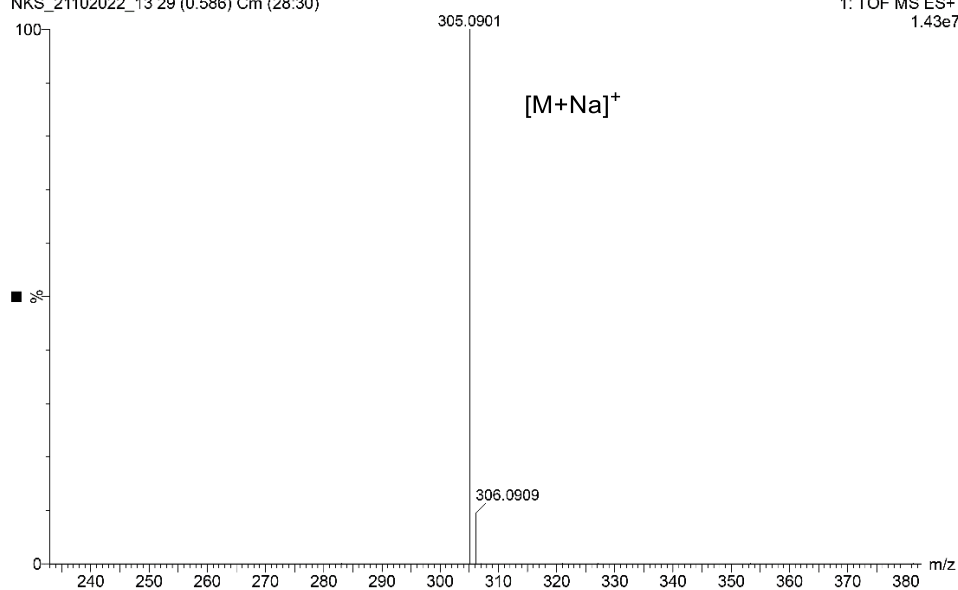

**Fig S36.** ESI-HRMS spectra of oxidized troponyl glycine derivative **4a**.

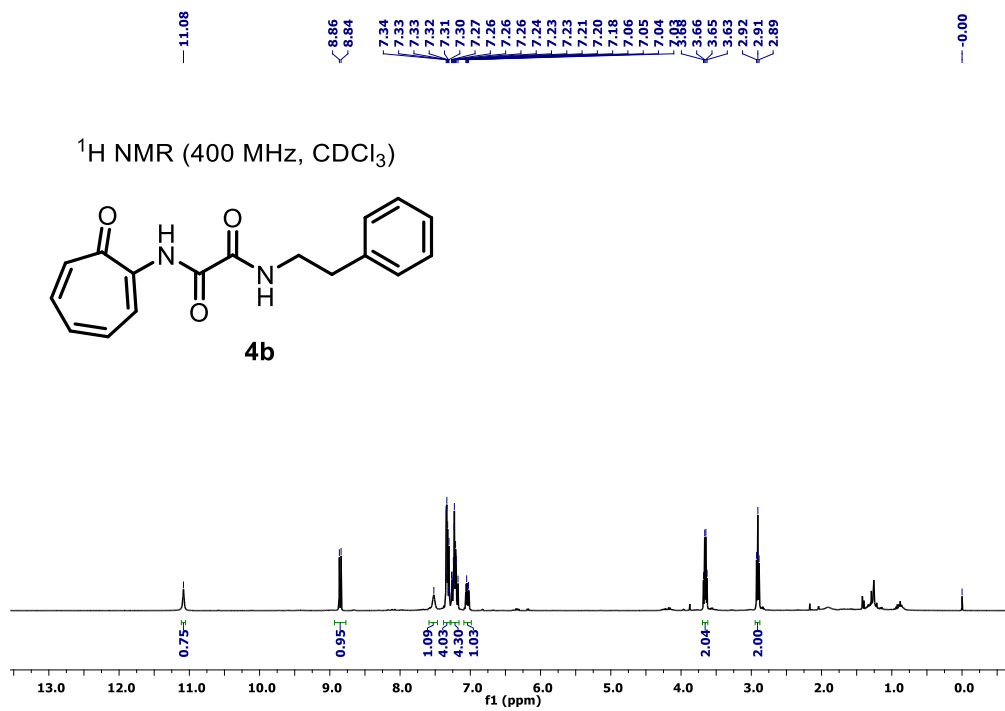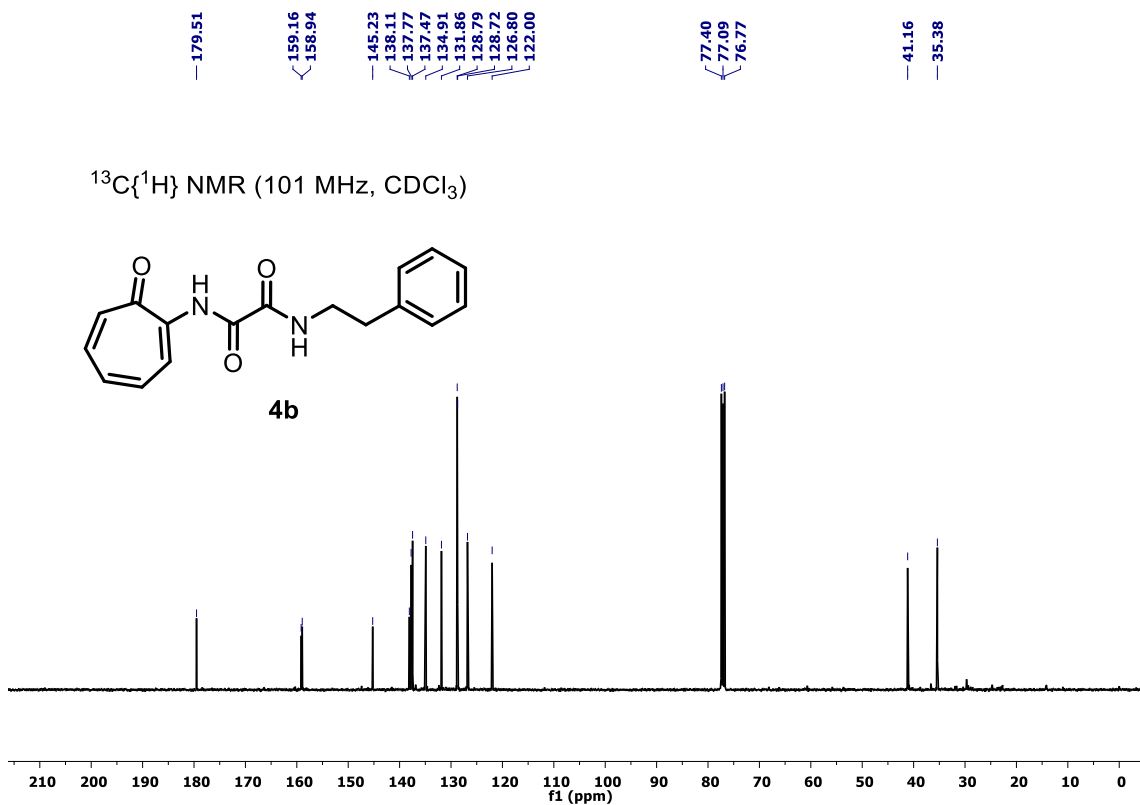

**Fig S37.** <sup>1</sup>H, <sup>13</sup>C {<sup>1</sup>H} NMR spectra of oxidized troponyl glycine derivative **4b**.

# Display Report

## Analysis Info

Analysis Name D:\Data\JULY-2021\NKS\17072021\_-NKS-CKJ-420(A)-RE.d  
Method Pos\_tune\_low\_05122019.m  
Sample Name Tmix-131118  
Comment

Acquisition Date 7/17/2021 5:20:50 PM  
Operator Amit S.Sahu  
Instrument micrOTOF-Q II 10337

## Acquisition Parameter

|             |            |                       |           |                  |           |
|-------------|------------|-----------------------|-----------|------------------|-----------|
| Source Type | ESI        | Ion Polarity          | Positive  | Set Nebulizer    | 0.5 Bar   |
| Focus       | Not active | Set Capillary         | 4500 V    | Set Dry Heater   | 180 °C    |
| Scan Begin  | 50 m/z     | Set End Plate Offset  | -500 V    | Set Dry Gas      | 4.0 l/min |
| Scan End    | 3000 m/z   | Set Collision Cell RF | 130.0 Vpp | Set Divert Valve | Waste     |

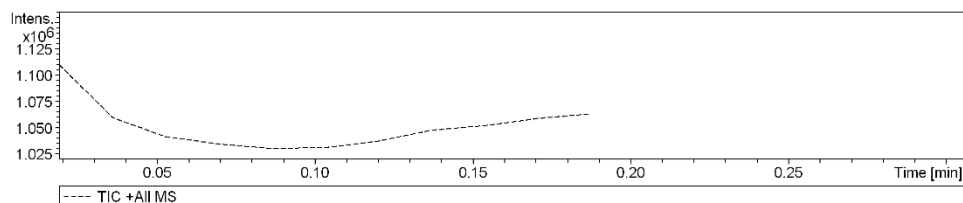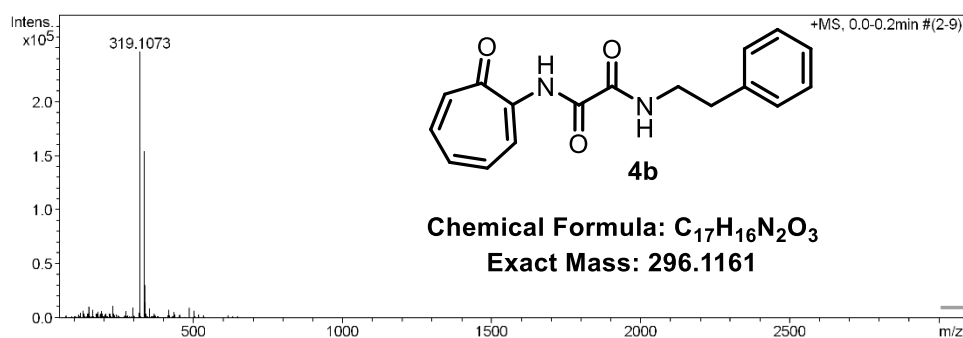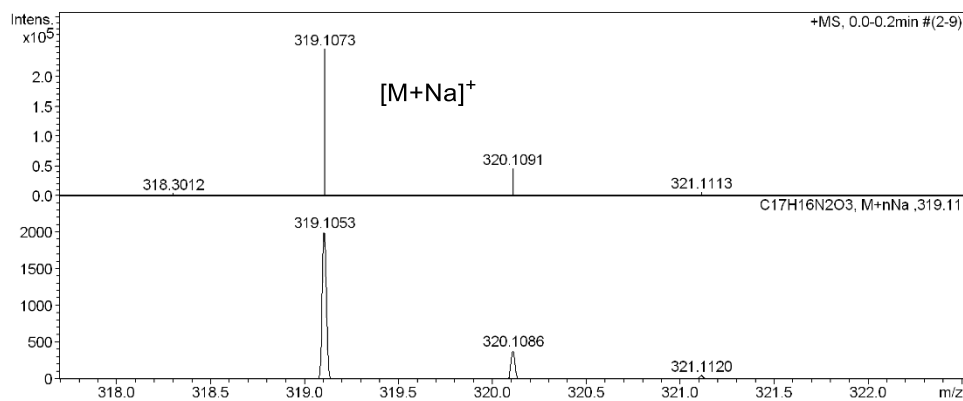

**Fig S38.** ESI-HRMS spectra of oxidized troponyl glycine derivative **4b**.

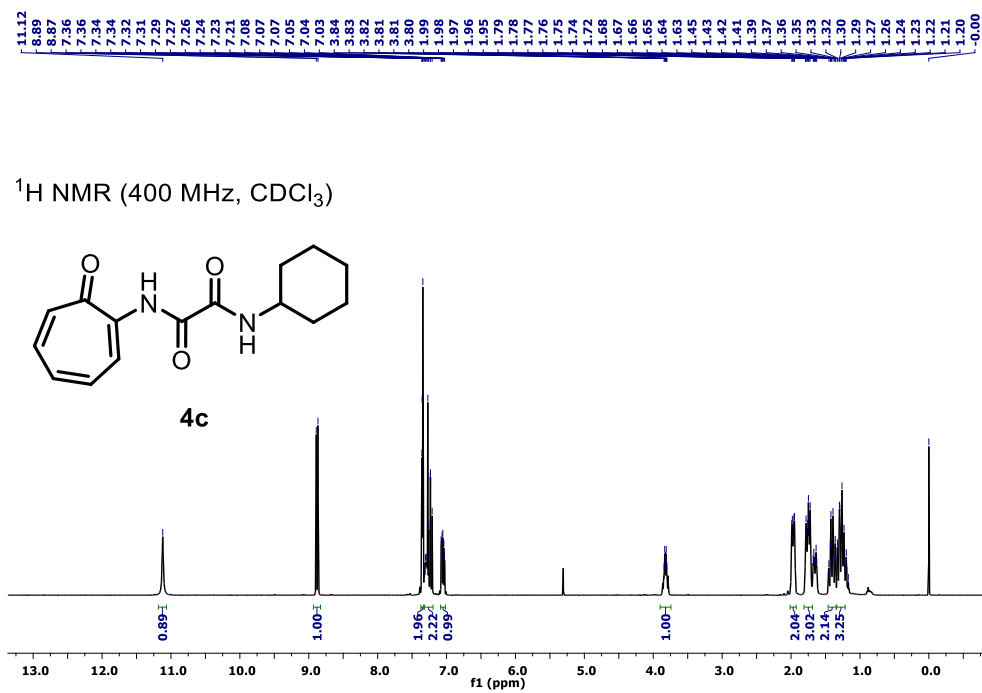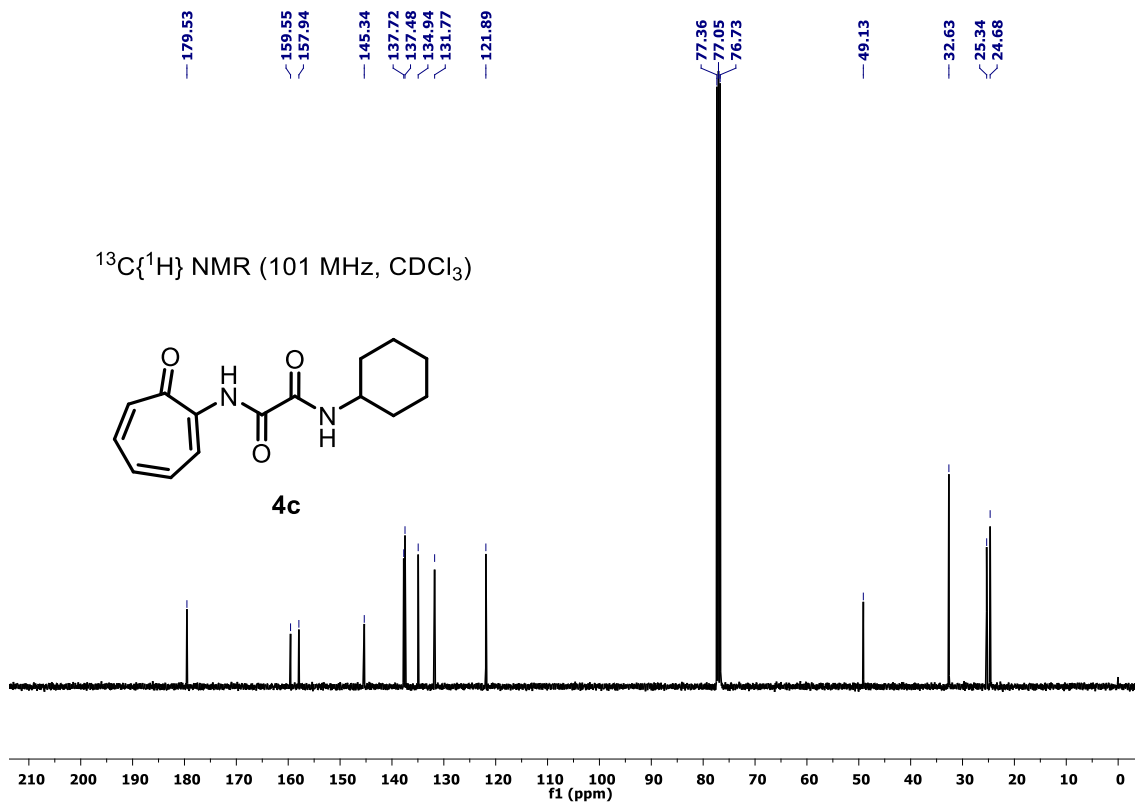

**Fig S39.** <sup>1</sup>H, <sup>13</sup>C {<sup>1</sup>H} NMR spectra of oxidized troponyl glycine derivative **4c**.



NKS\_CKJ\_1072

15-Feb-2023  
23:16:54

XEVO-G2XSQTOF#YFA1739

NKS\_15022023\_9 (0.053) Cu (0.05); Is (1.00,1.00) C<sub>15</sub>H<sub>18</sub>N<sub>2</sub>O<sub>3</sub>Na

1: TOF MS ES+  
8.37e12

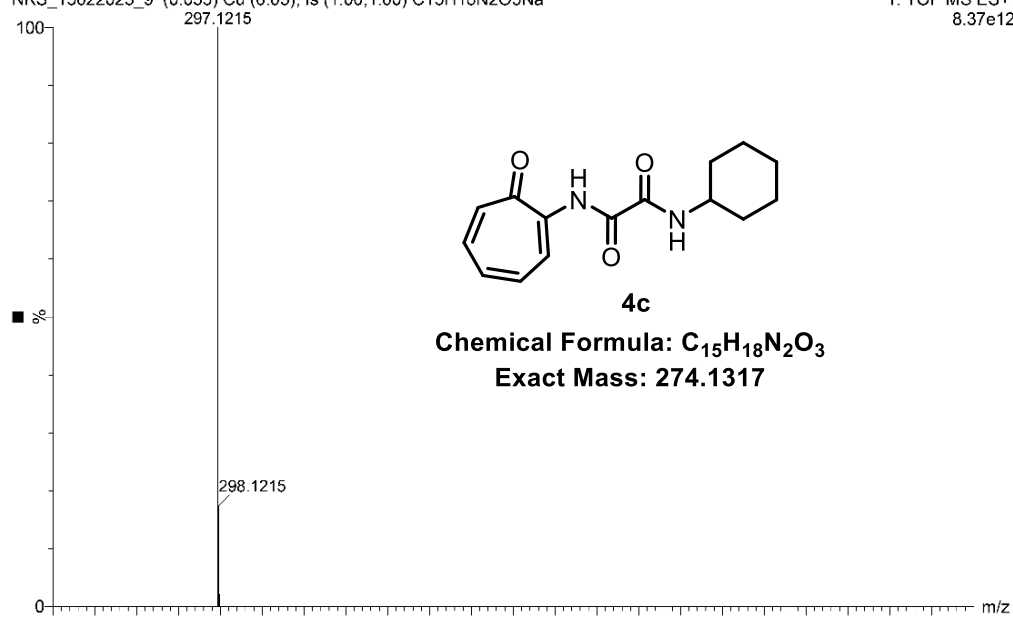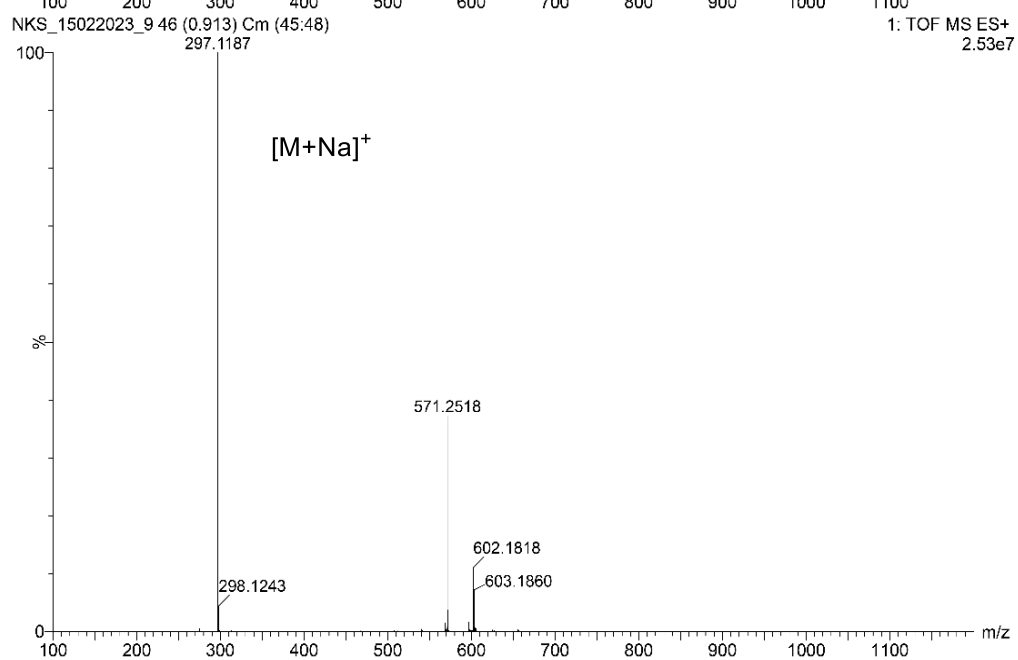

**Fig S40.** ESI-HRMS spectra of oxidized troponyl glycine derivative **4c**.



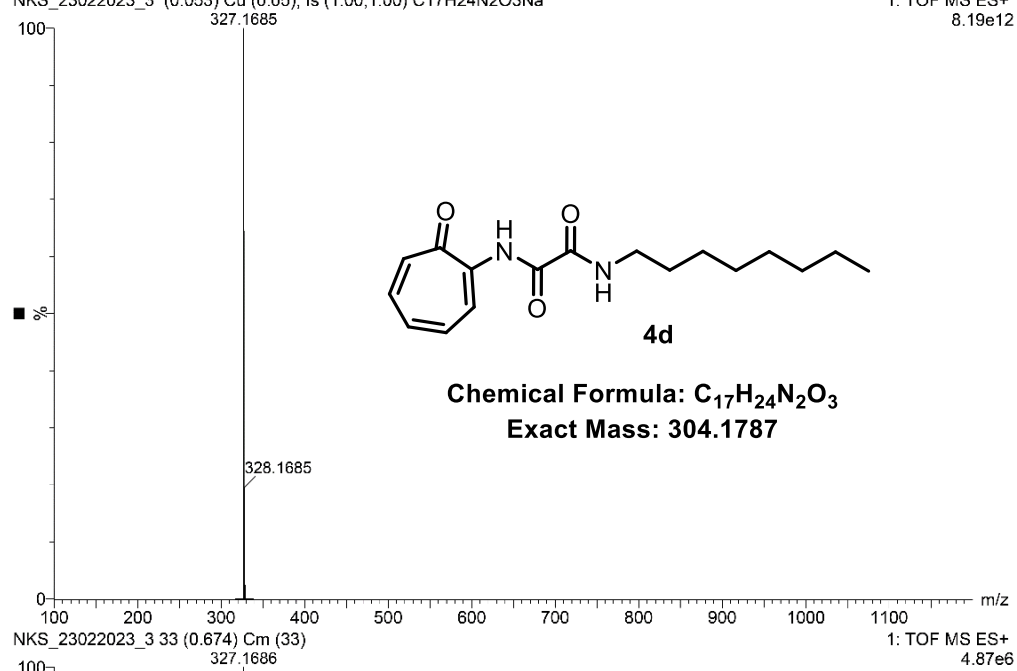

**Fig S42.** ESI-HRMS spectra of oxidized troponyl glycine derivative **4d**.

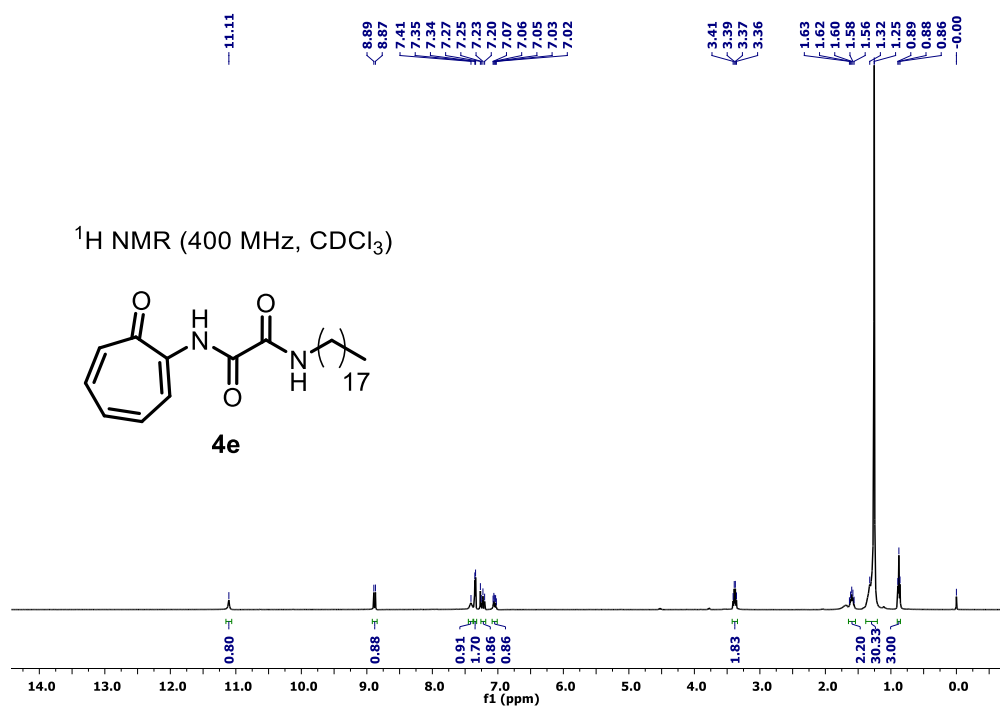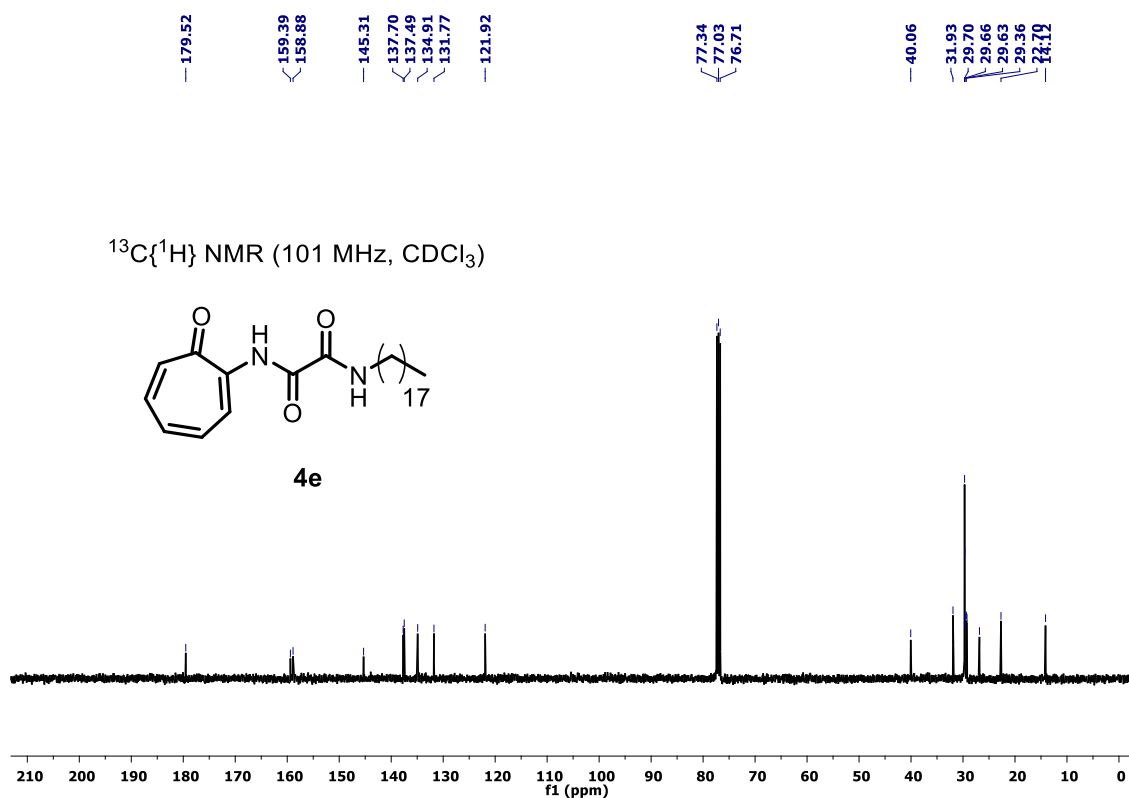

**Fig S43.** <sup>1</sup>H, <sup>13</sup>C {<sup>1</sup>H} NMR spectra of oxidized troponyl glycine derivative **4e**.

NKS\_CKJ\_1119 A

23-Mar-2023  
20:31:56

XEVO-G2XSQTOF#YFA1739

NKS\_23032023\_1 (0.053) Cu (0.05); Is (1.00,1.00) C27H44N2O3Na

1: TOF MS ES+  
7.33e12

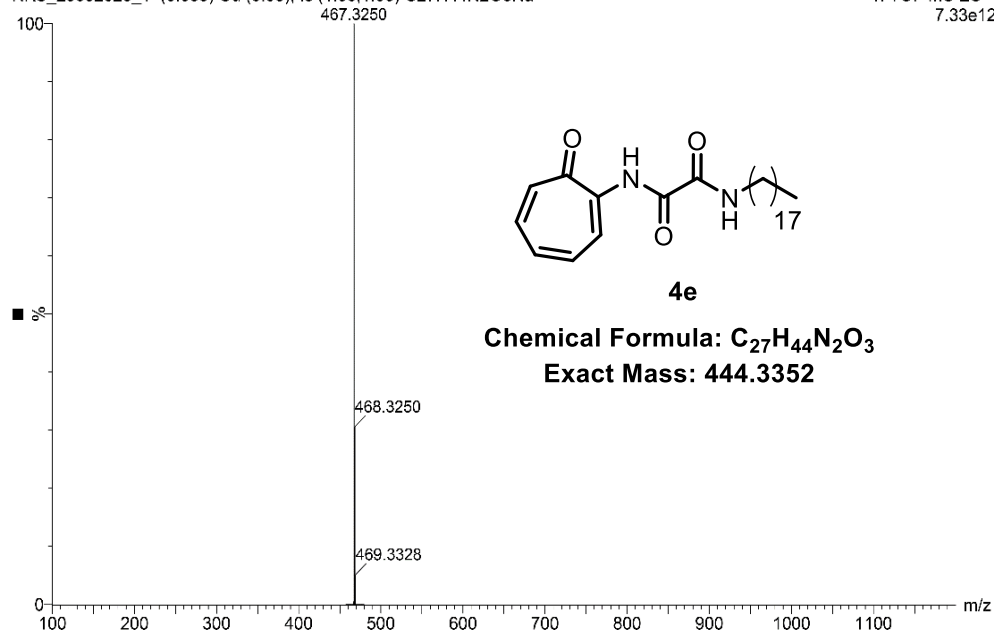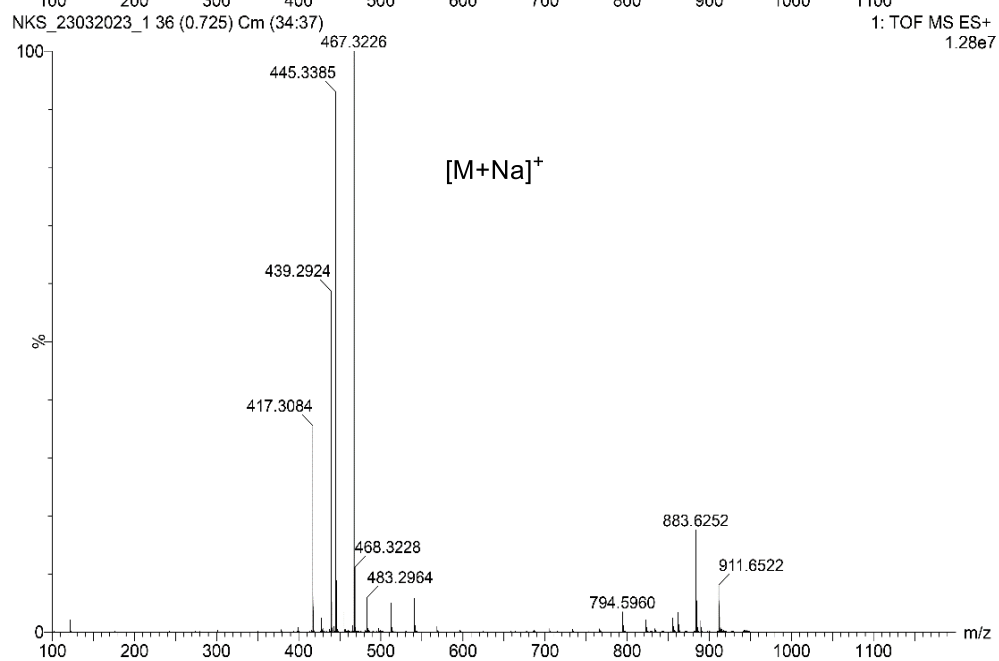

**Fig S44.** ESI-HRMS spectra of oxidized troponyl glycine derivative **4e**.

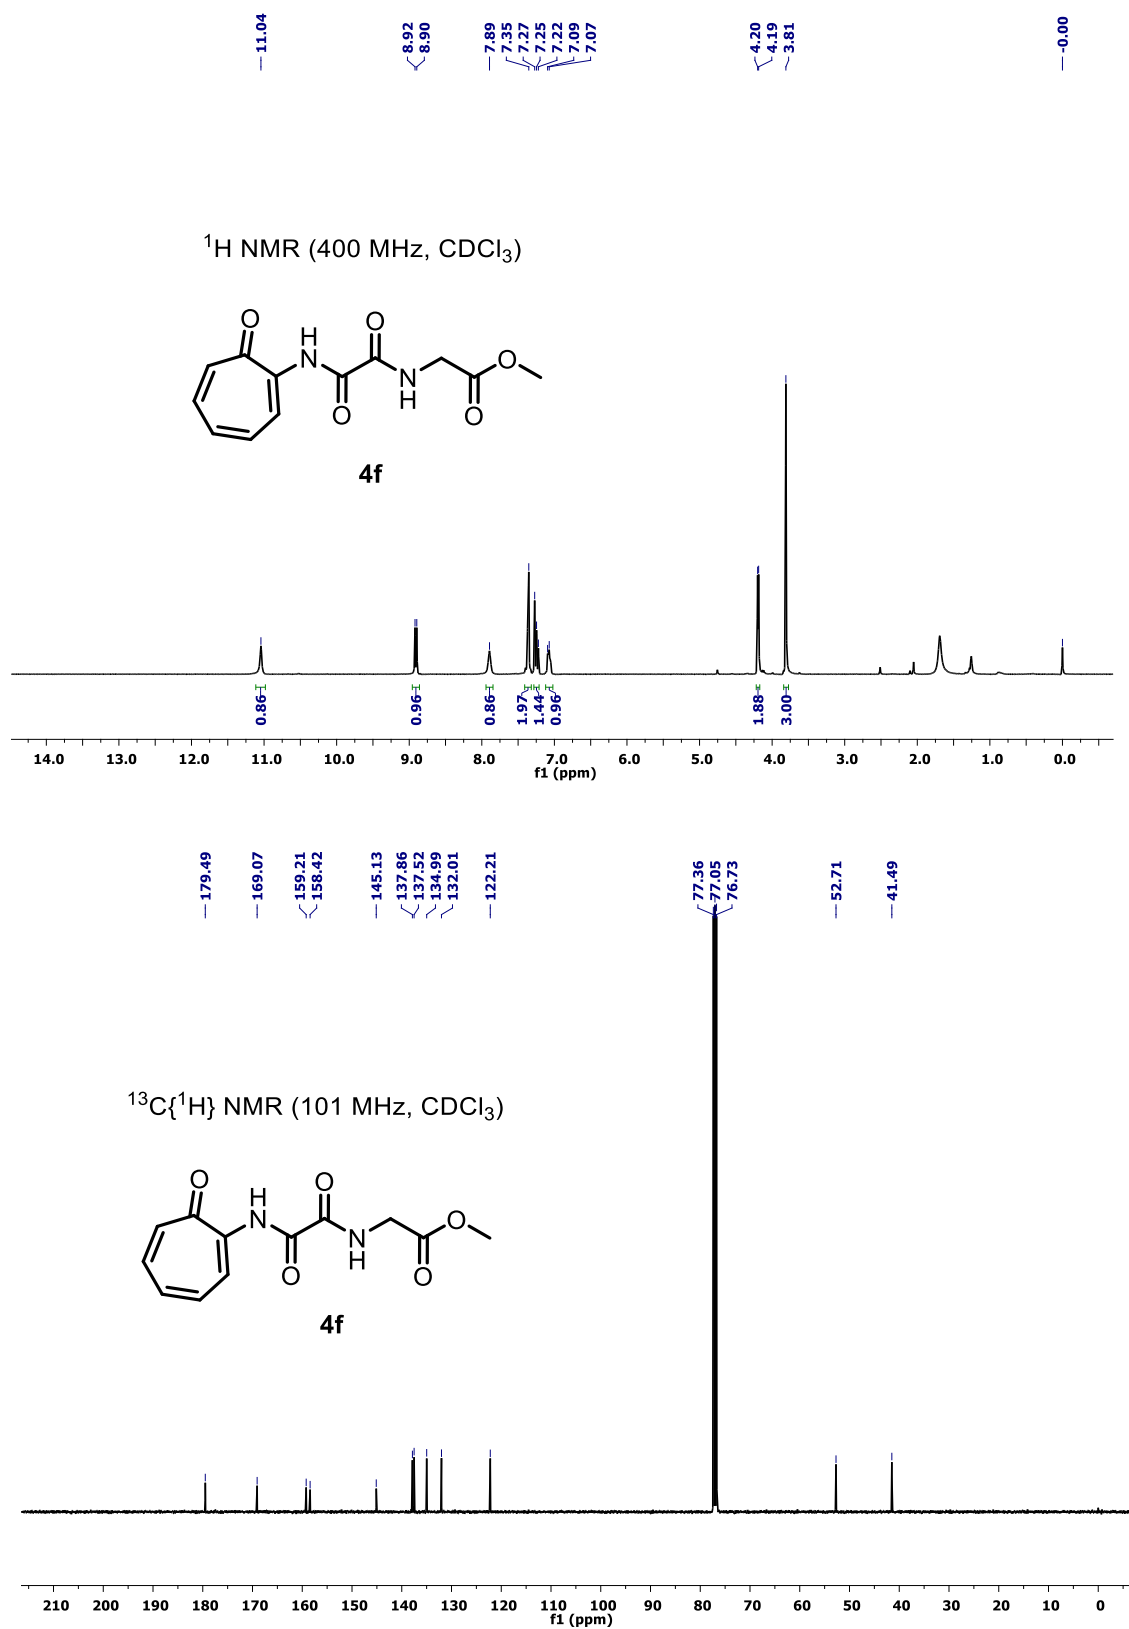

**Fig S45.**  $^1\text{H}$ ,  $^{13}\text{C}\{^1\text{H}\}$  NMR spectra of oxidized troponyl glycine derivative **4f**.

NKS\_CKJ\_999 RE

01-Dec-2022  
02:11:24

XEVO-G2XSQTOF#YFA1739

NKS\_30112022\_7 (0.053) Cu (0.05); Is (1.00,1.00) C<sub>12</sub>H<sub>13</sub>N<sub>2</sub>O<sub>5</sub>

1: TOF MS ES+  
8.61e12

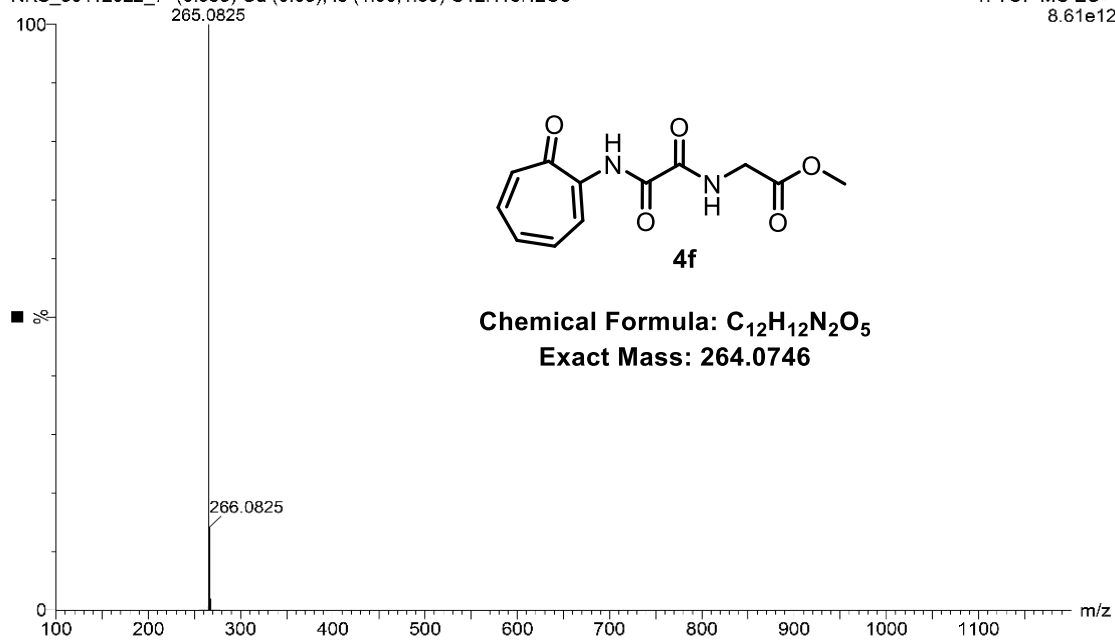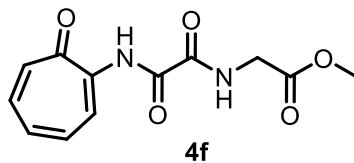

Chemical Formula: C<sub>12</sub>H<sub>12</sub>N<sub>2</sub>O<sub>5</sub>  
Exact Mass: 264.0746

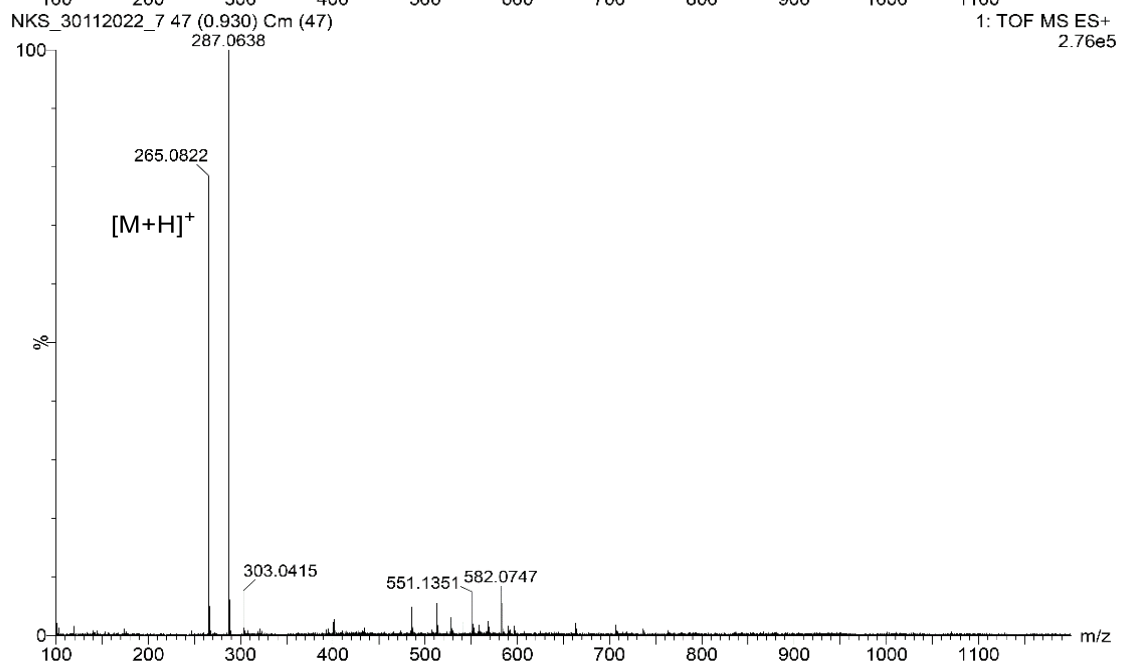

**Fig S46.** ESI-HRMS spectra of oxidized troponyl glycine derivative **4f**.

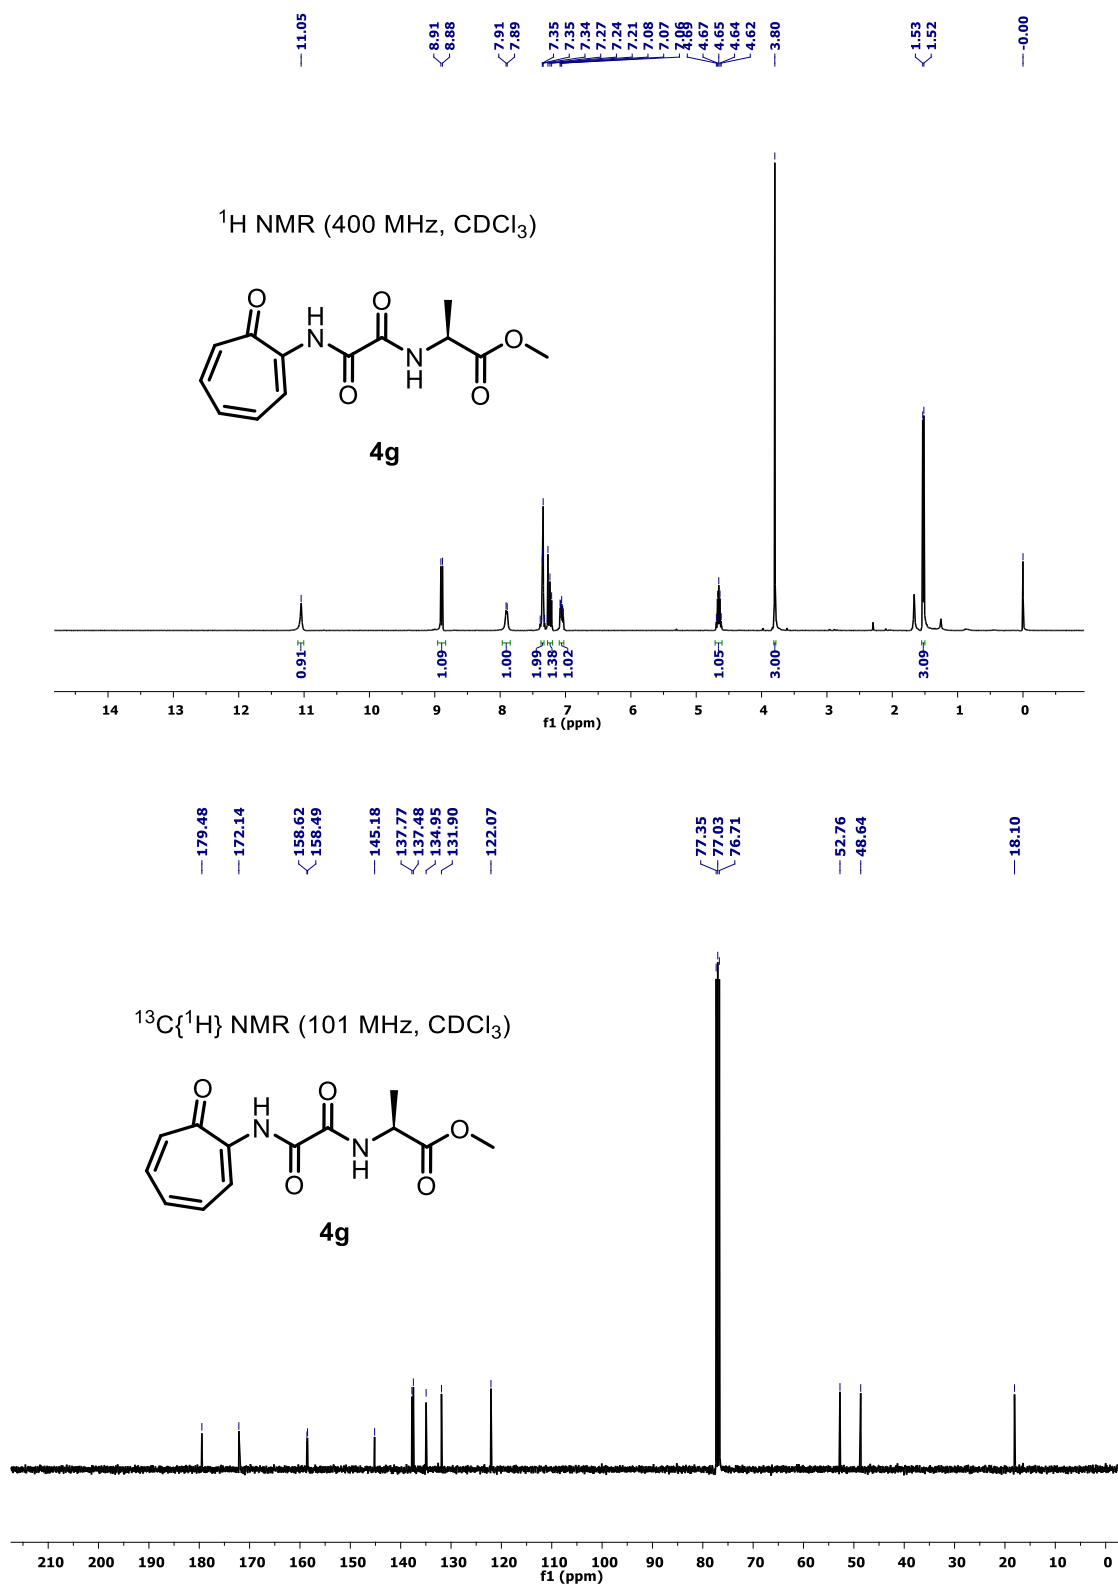

**Fig S47.** <sup>1</sup>H, <sup>13</sup>C {<sup>1</sup>H} NMR spectra of oxidized troponyl glycine derivative **4g**.



NKS\_CKJ\_1030 A

17-Feb-2023  
00:01:32

XEVO-G2XSQTOF#YFA1739

NKS\_16022023\_6 (0.053) Cu (0.05); Is (1.00,1.00) C<sub>13</sub>H<sub>14</sub>N<sub>2</sub>O<sub>5</sub>Na

1: TOF MS ES+  
8.51e12

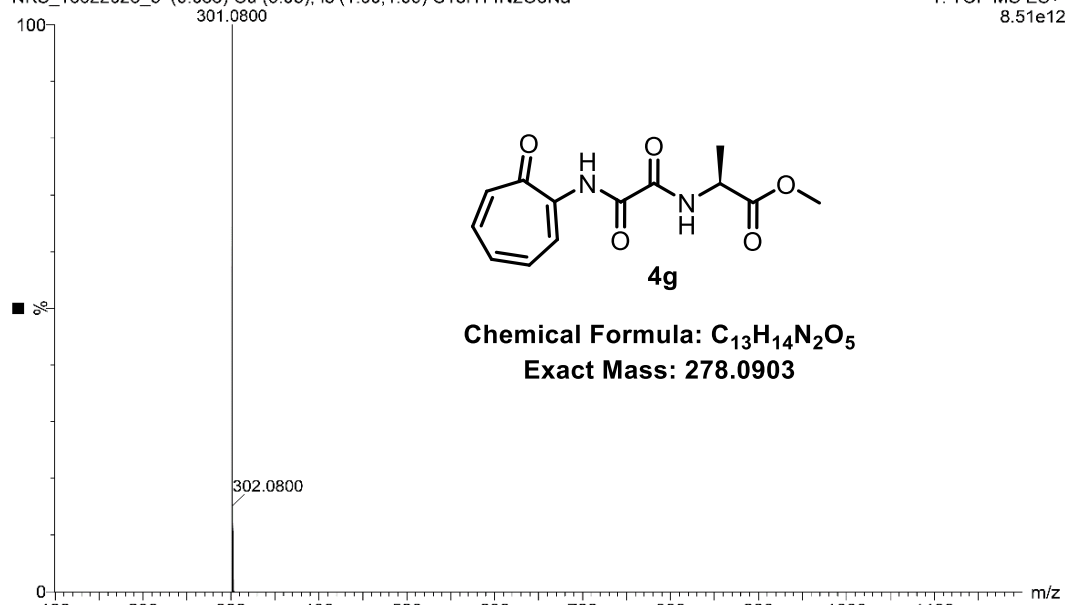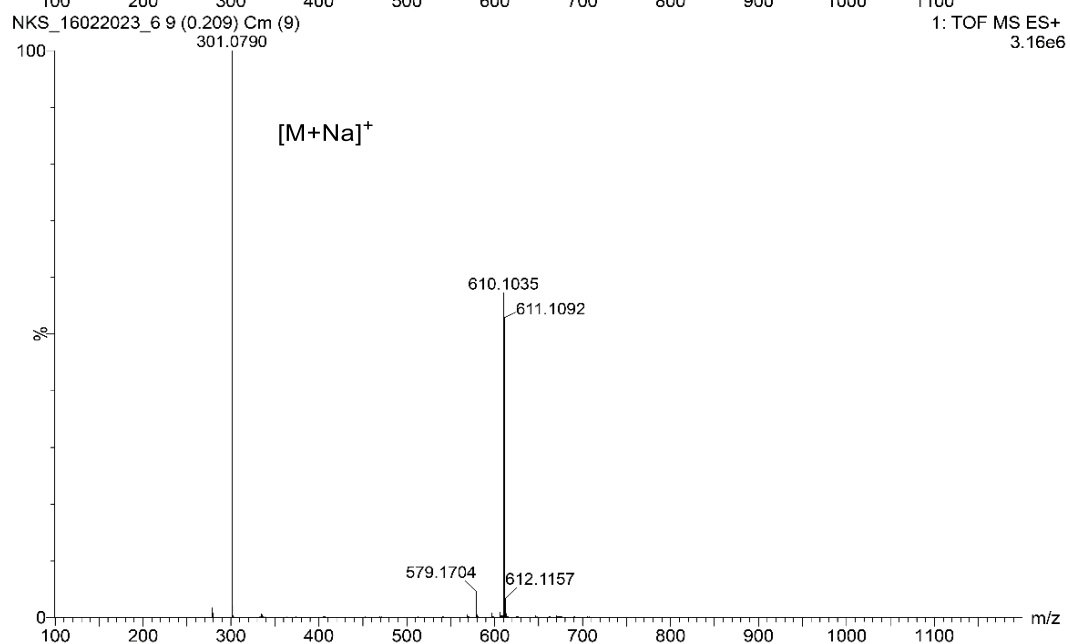

**Fig S48.** ESI-HRMS spectra of oxidized troponyl glycine derivative **4g**.

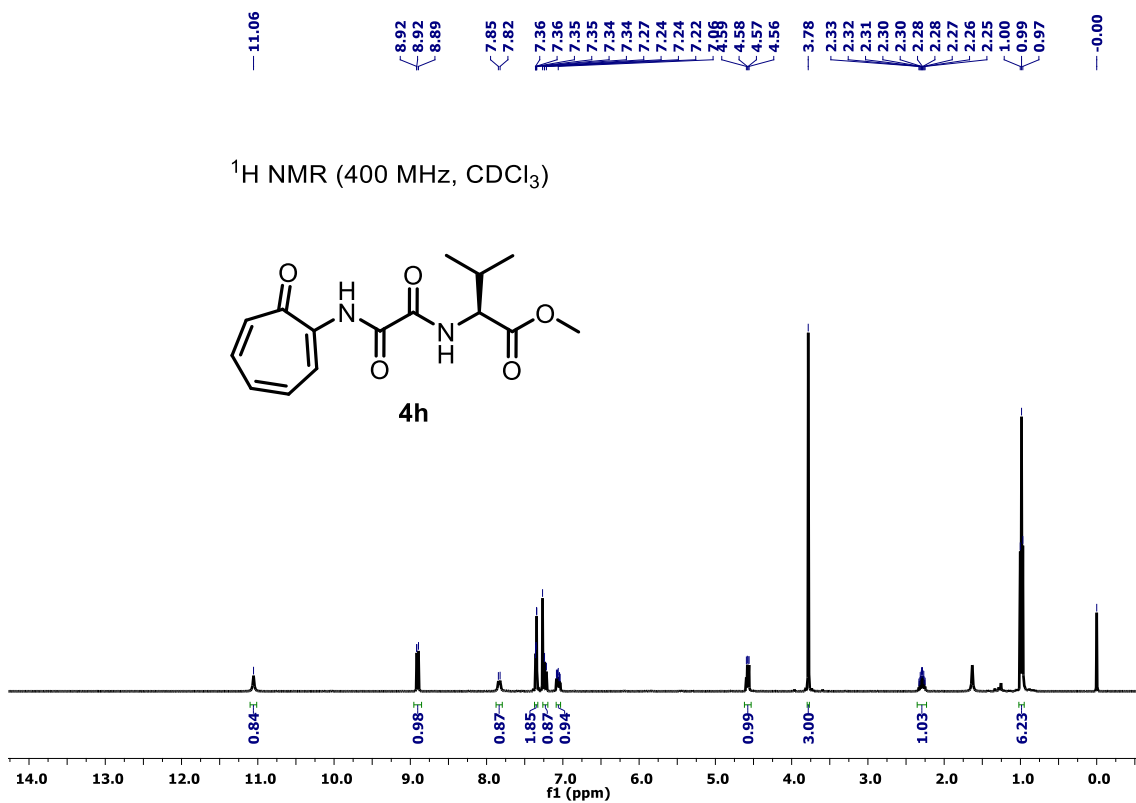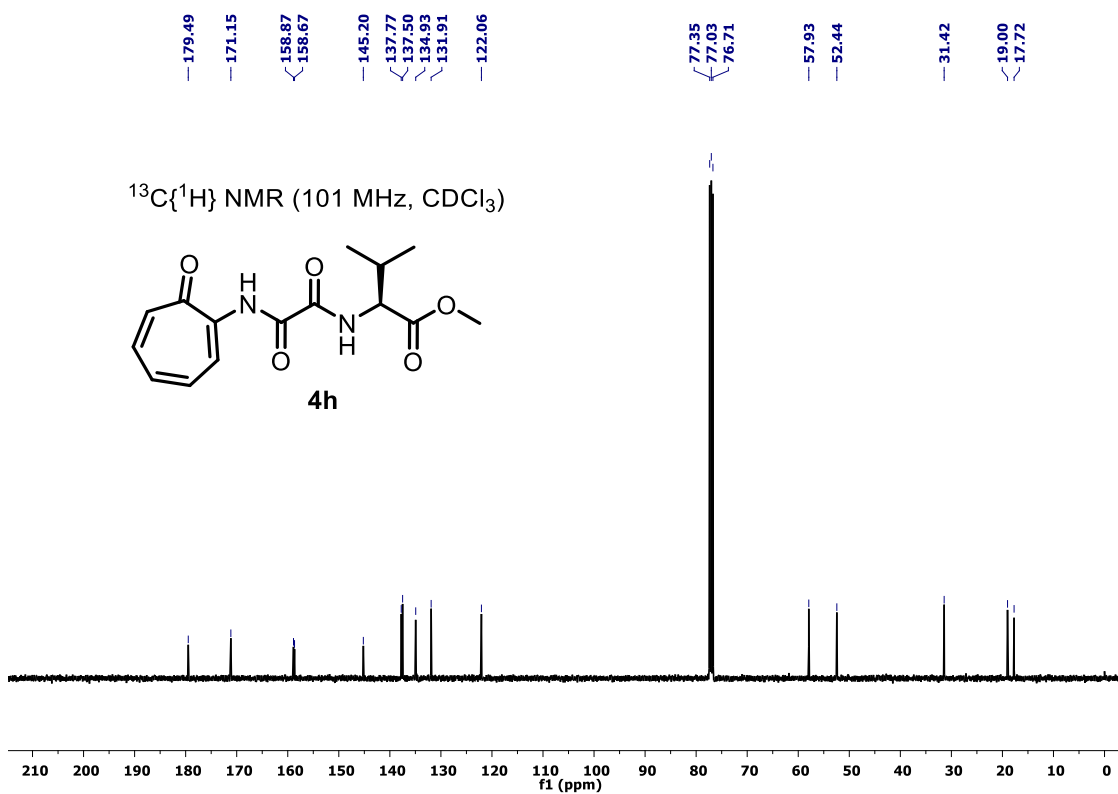

**Fig S49.** <sup>1</sup>H, <sup>13</sup>C {<sup>1</sup>H} NMR spectra of oxidized troponyl glycine derivative **4h**.

NKS\_CKJ\_1031

17-Feb-2023  
00:15:10

XEVO-G2XSQTOF#YFA1739

NKS\_16022023\_7 (0.053) Cu (0.05); Is (1.00,1.00) C<sub>15</sub>H<sub>18</sub>N<sub>2</sub>O<sub>5</sub>Na

1: TOF MS ES+  
8.33e12

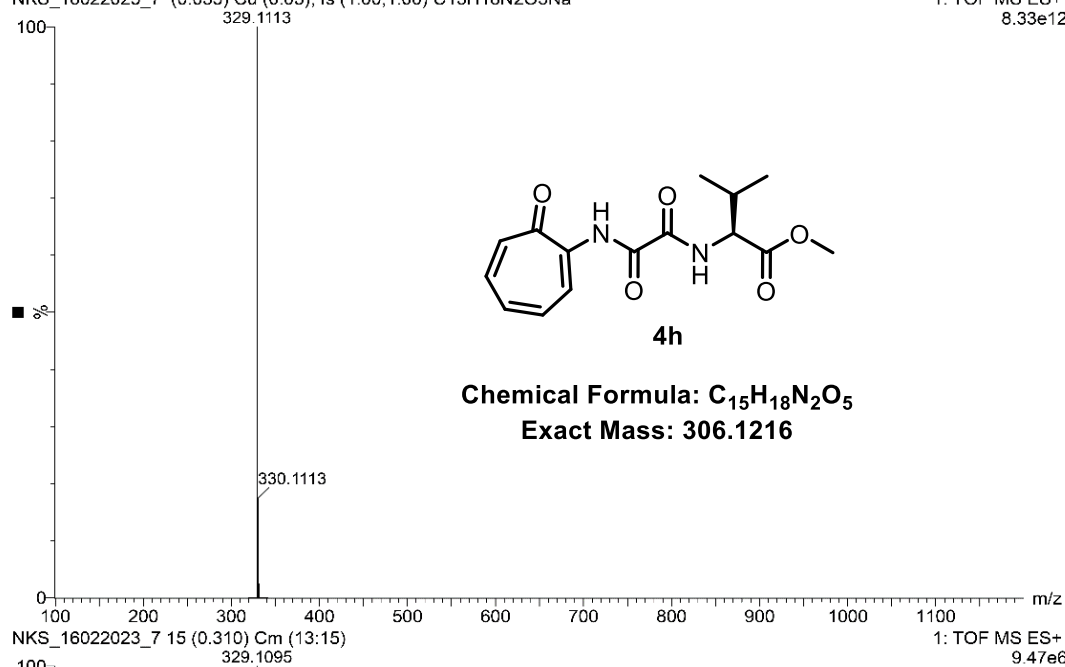

**Fig S50.** ESI-HRMS spectra of oxidized troponyl glycine derivative **4h**.

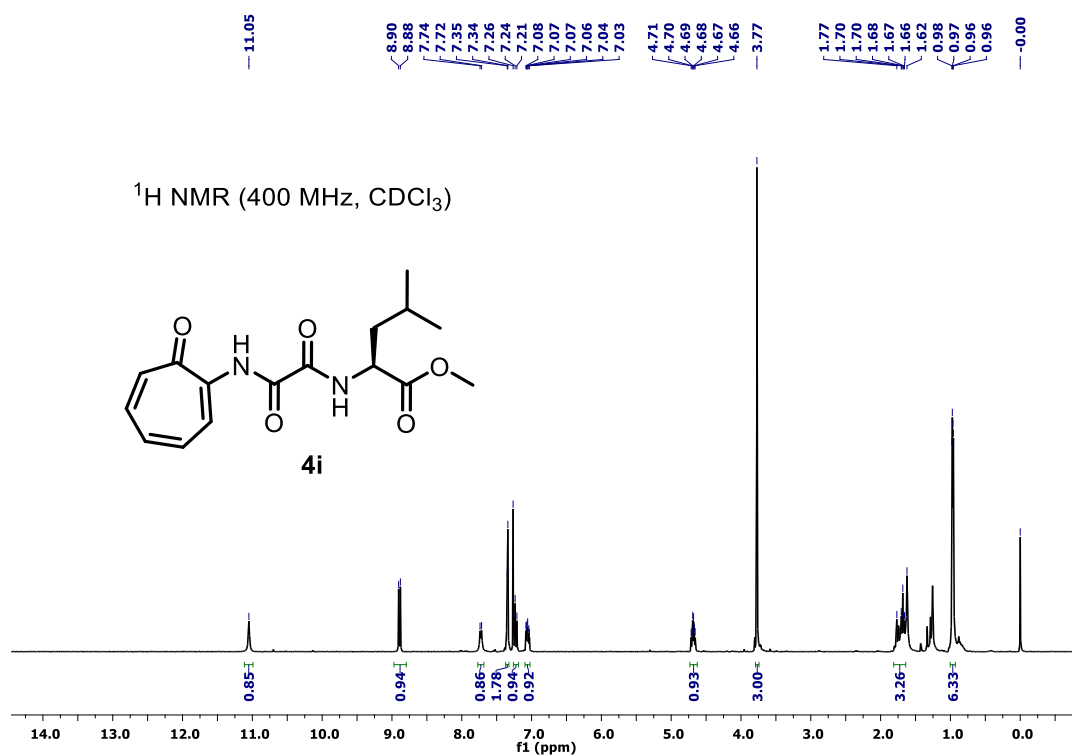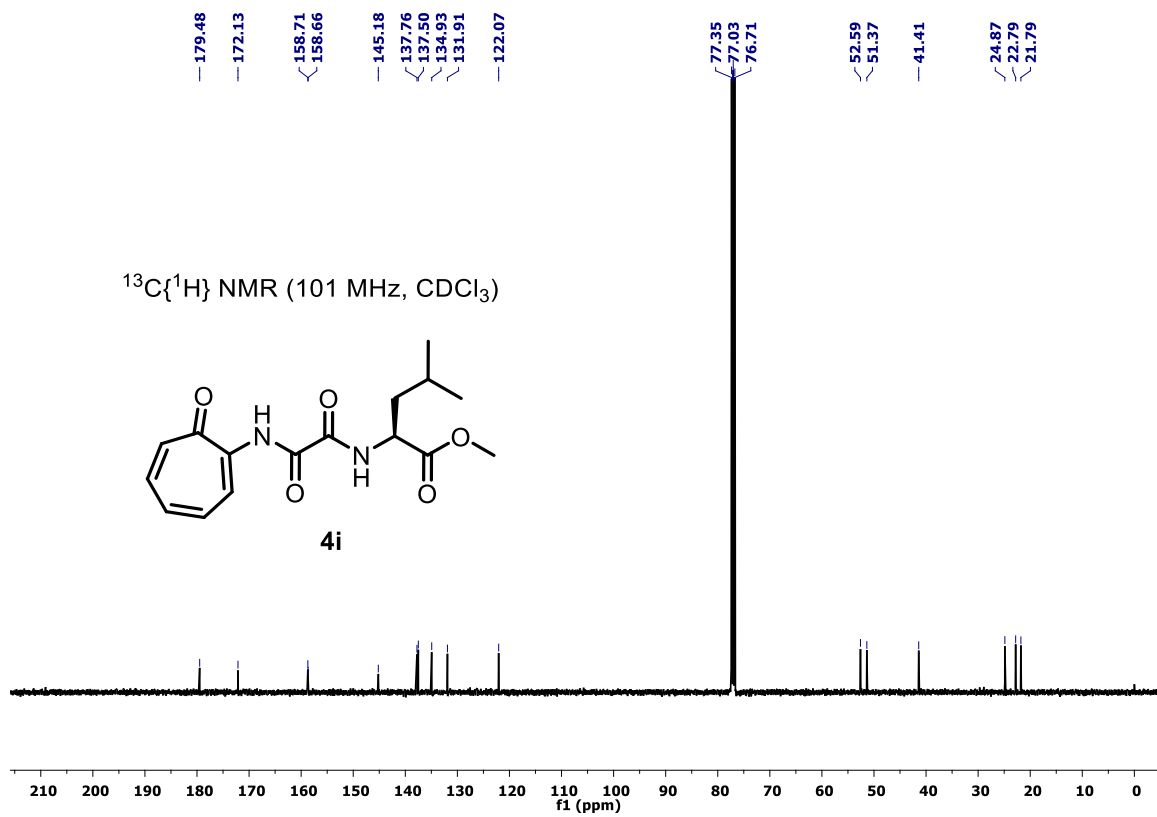

**Fig S51.** <sup>1</sup>H, <sup>13</sup>C {<sup>1</sup>H} NMR spectra of oxidized troponyl glycine derivative **4i**.

NKS\_CKJ\_1034

17-Feb-2023

00:38:30

XEVO-G2XSQTOF#YFA1739

NKS\_16022023\_9 (0.053) Cu (0.05); Is (1.00,1.00) C<sub>16</sub>H<sub>20</sub>N<sub>2</sub>O<sub>5</sub>Na

1: TOF MS ES+

8.24e12

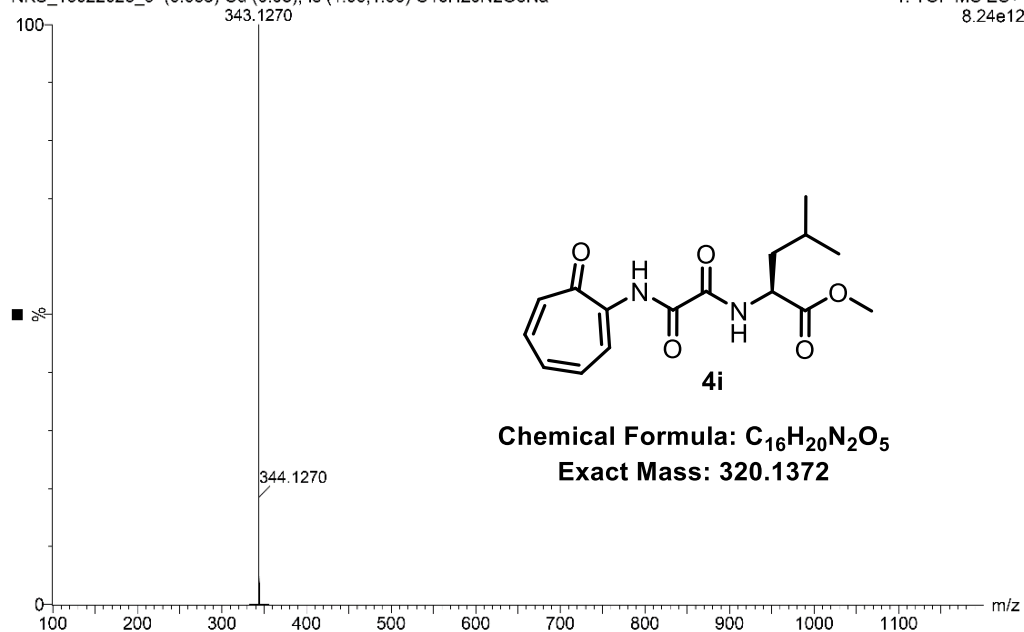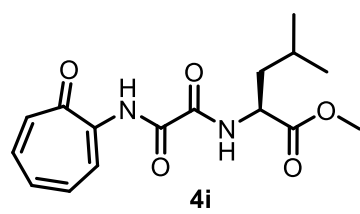

Chemical Formula: C<sub>16</sub>H<sub>20</sub>N<sub>2</sub>O<sub>5</sub>  
Exact Mass: 320.1372

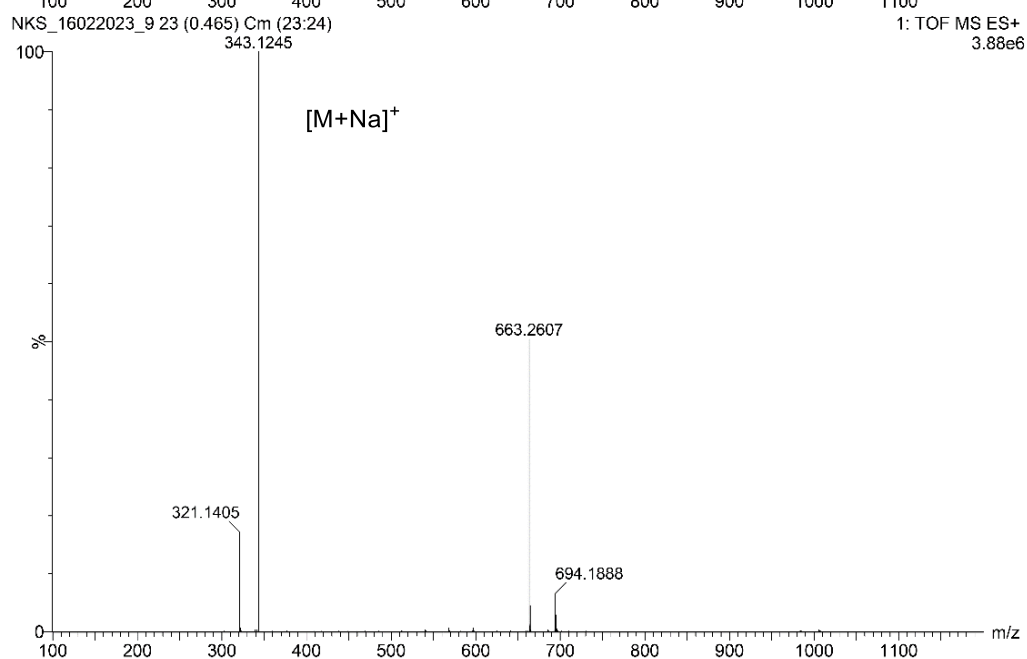

**Fig S52.** ESI-HRMS spectra of oxidized troponyl glycine derivative **4i**.

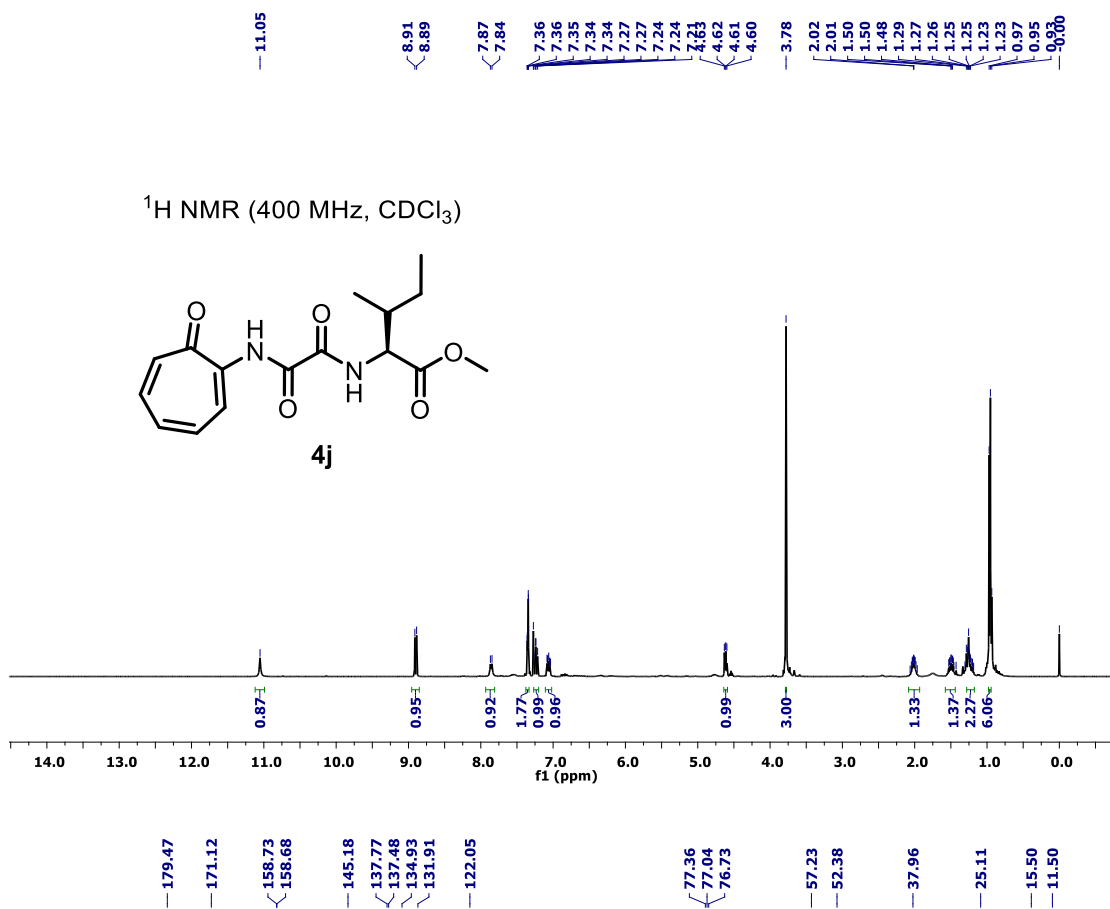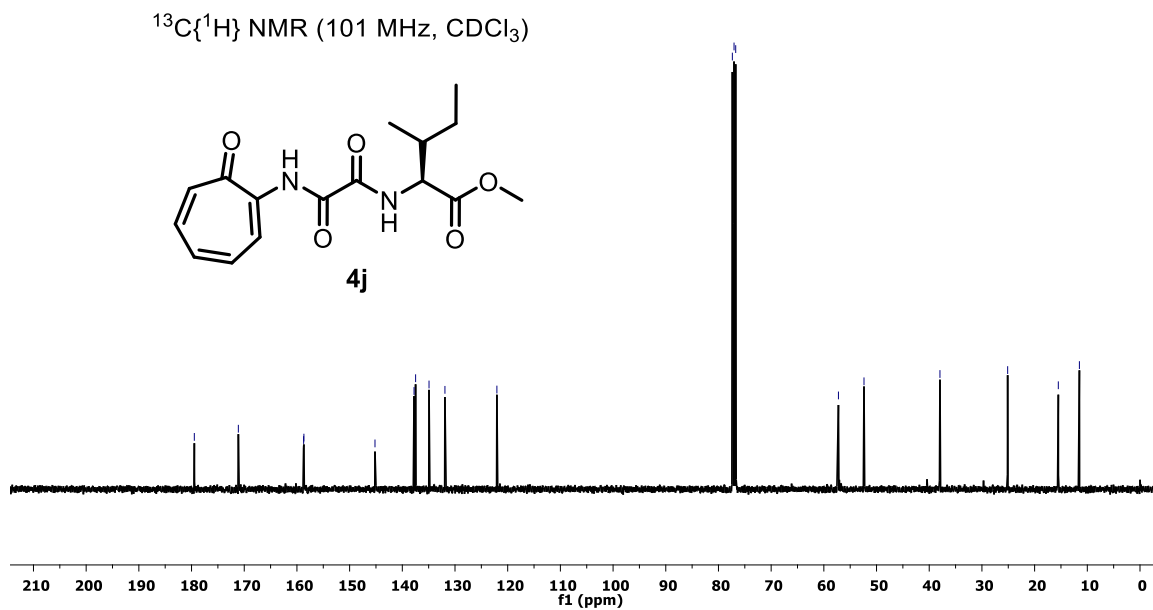

**Fig S53.** <sup>1</sup>H, <sup>13</sup>C {<sup>1</sup>H} NMR spectra of oxidized troponyl glycine derivative **4j**.

NKS\_CKJ\_1035

17-Feb-2023  
00:50:43

XEVO-G2XSQTOF#YFA1739

NKS\_16022023\_10 (0.053) Cu (0.05); Is (1.00,1.00) C<sub>16</sub>H<sub>20</sub>N<sub>2</sub>O<sub>5</sub>Na

1: TOF MS ES+  
8.24e12

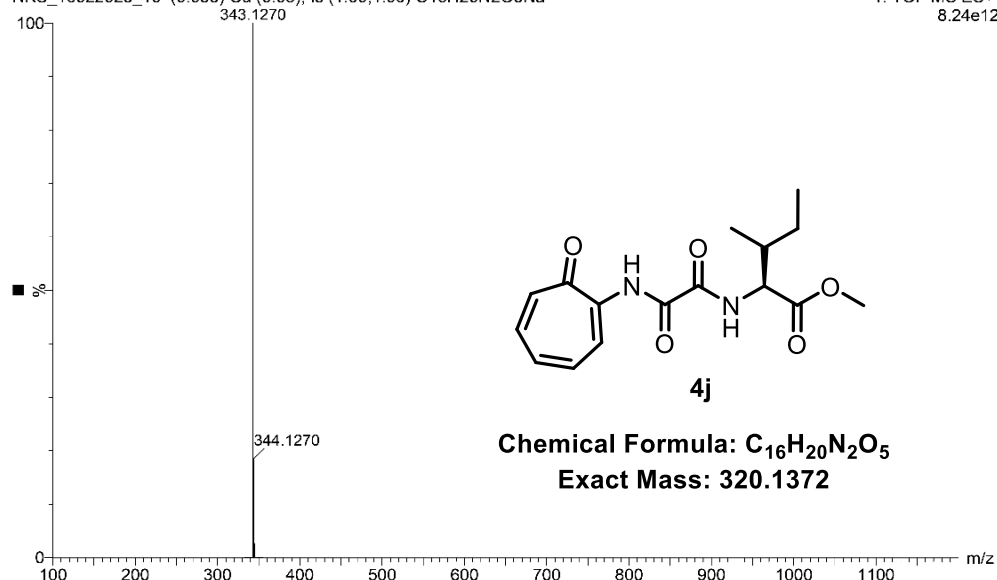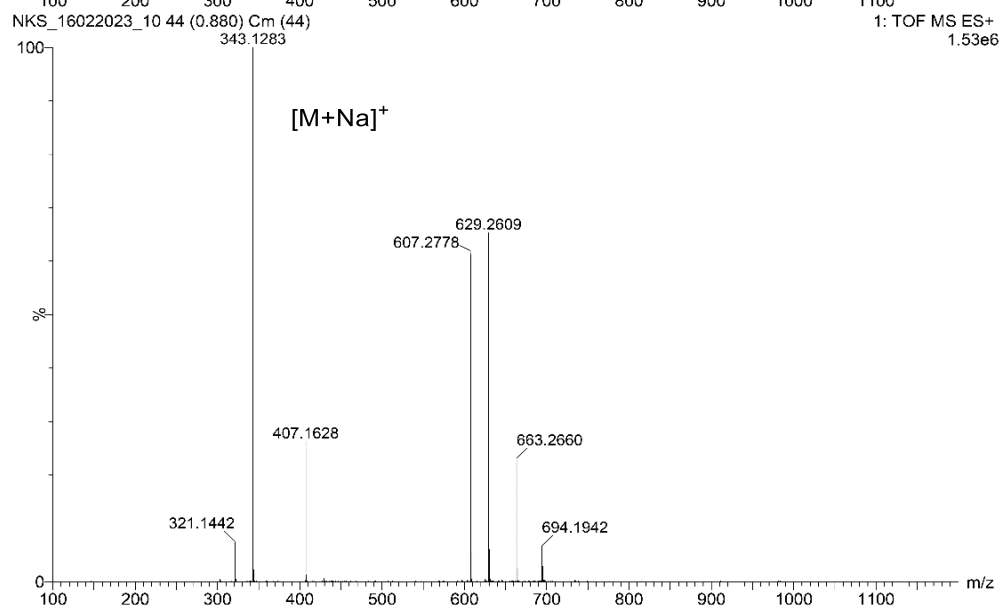

**Fig S54.** ESI-HRMS spectra of oxidized troponyl glycine derivative **4j**.

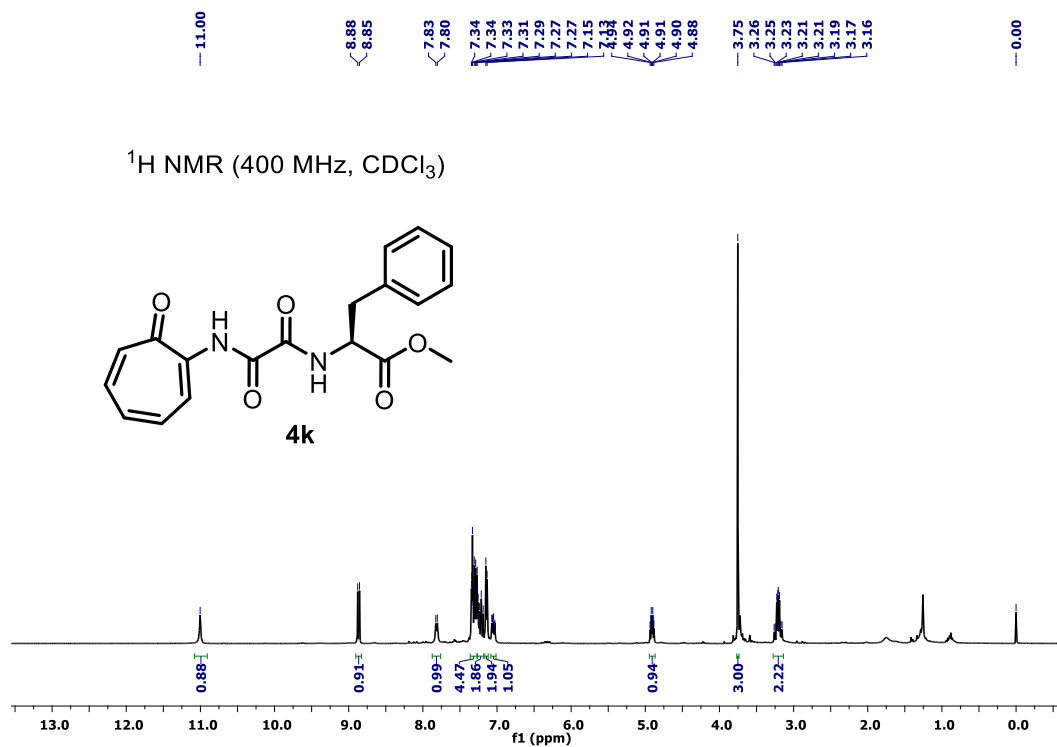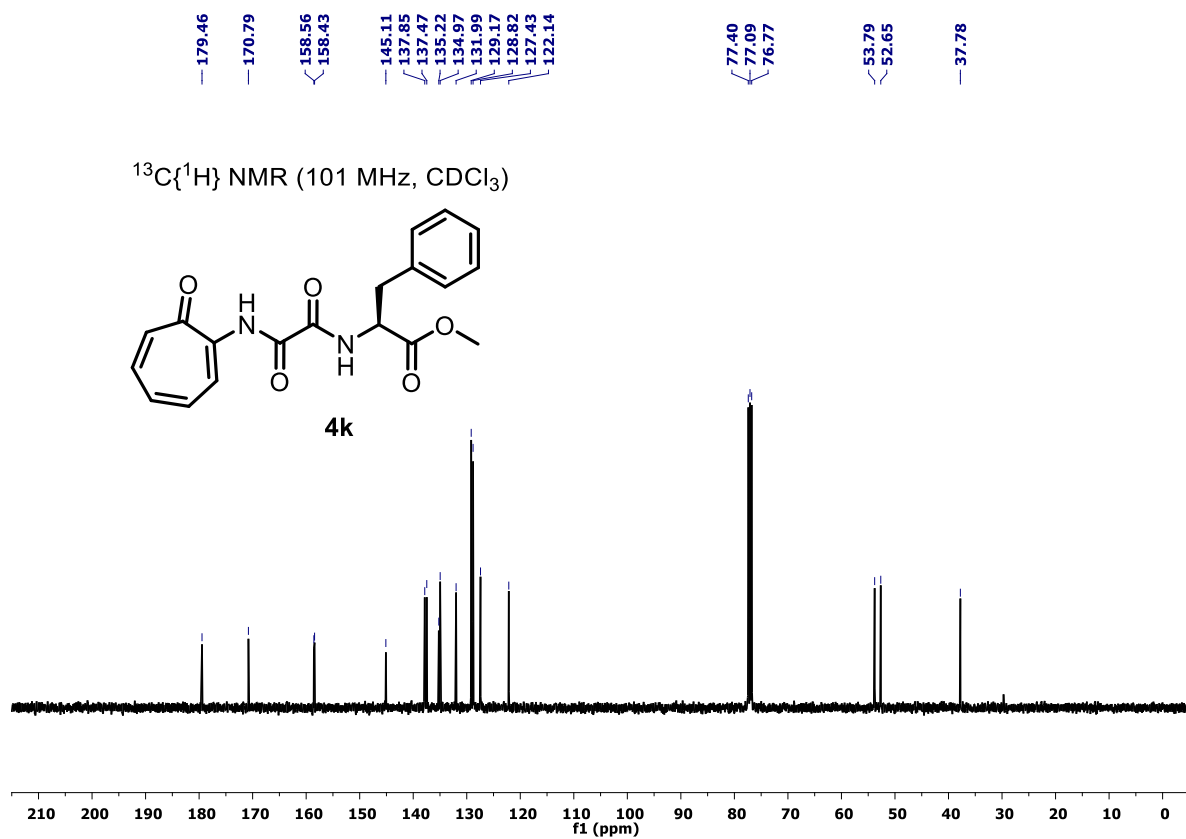

**Fig S55.** <sup>1</sup>H, <sup>13</sup>C {<sup>1</sup>H} NMR spectra of oxidized troponyl glycine derivative **4k**.



## Display Report

### Analysis Info

Analysis Name D:\Data\JULY-2021\NKS\17072021\_-NKS-CKJ-342(A).d  
Method Pos\_tune\_low\_05122019.m  
Sample Name Tmix-131118  
Comment

Acquisition Date 7/17/2021 4:33:22 PM

Operator Amit S.Sahu  
Instrument micrOTOF-Q II 10337

### Acquisition Parameter

|             |            |                       |           |                  |           |
|-------------|------------|-----------------------|-----------|------------------|-----------|
| Source Type | ESI        | Ion Polarity          | Positive  | Set Nebulizer    | 0.5 Bar   |
| Focus       | Not active | Set Capillary         | 4500 V    | Set Dry Heater   | 180 °C    |
| Scan Begin  | 50 m/z     | Set End Plate Offset  | -500 V    | Set Dry Gas      | 4.0 l/min |
| Scan End    | 3000 m/z   | Set Collision Cell RF | 130.0 Vpp | Set Divert Valve | Waste     |

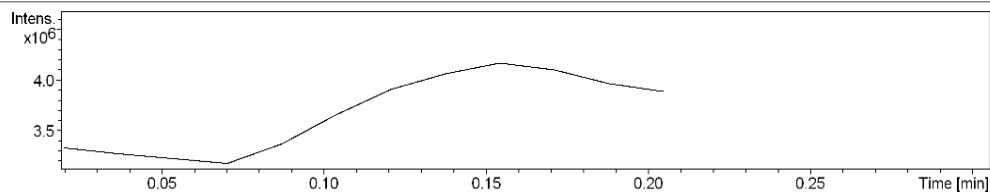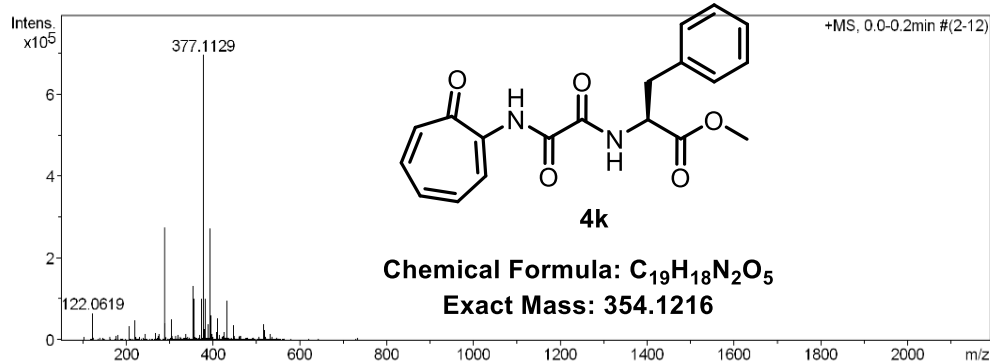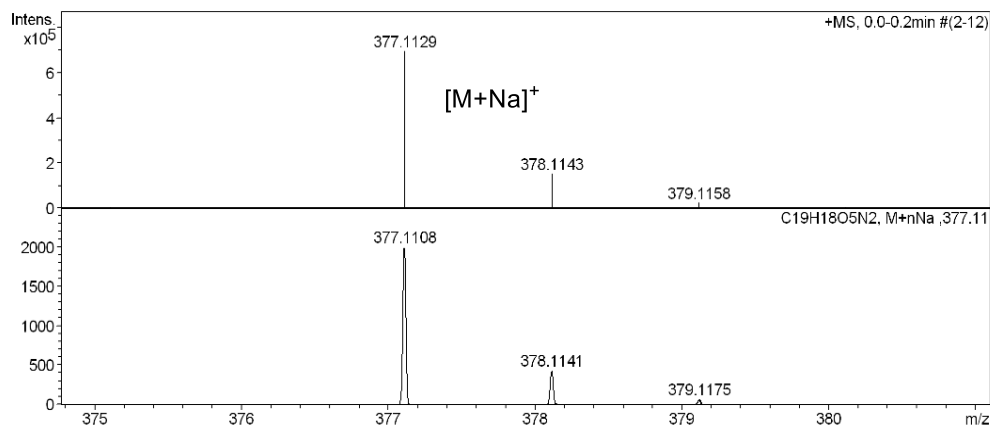

**Fig S56.** ESI-HRMS spectra of oxidized troponyl glycine derivative **4k**.

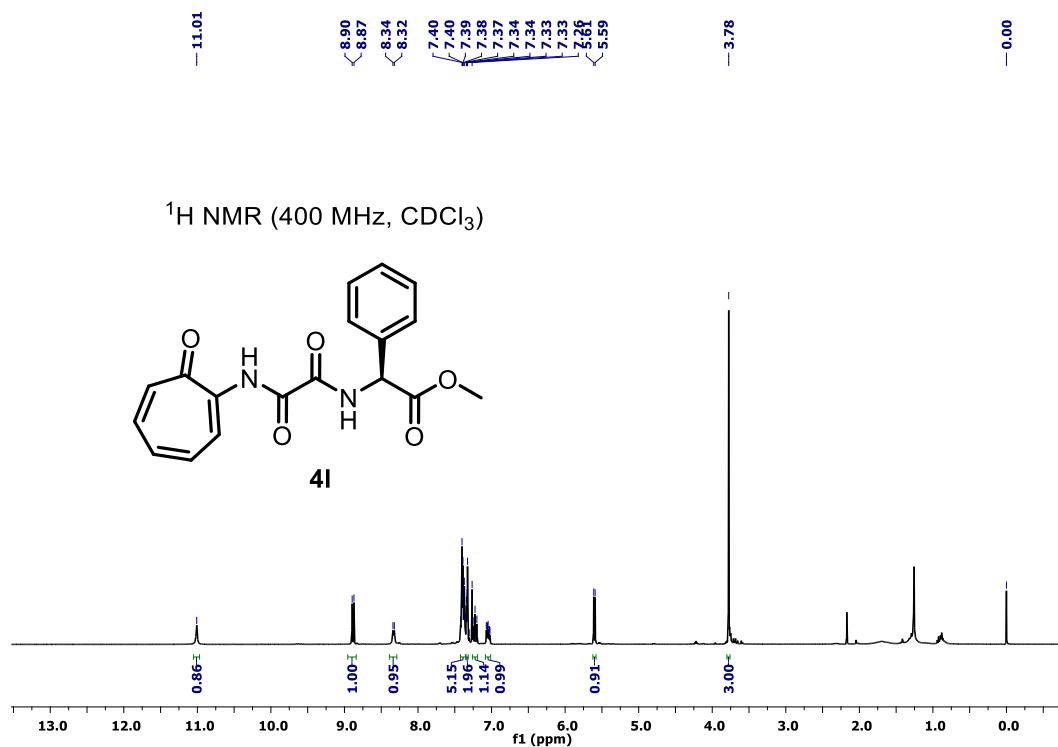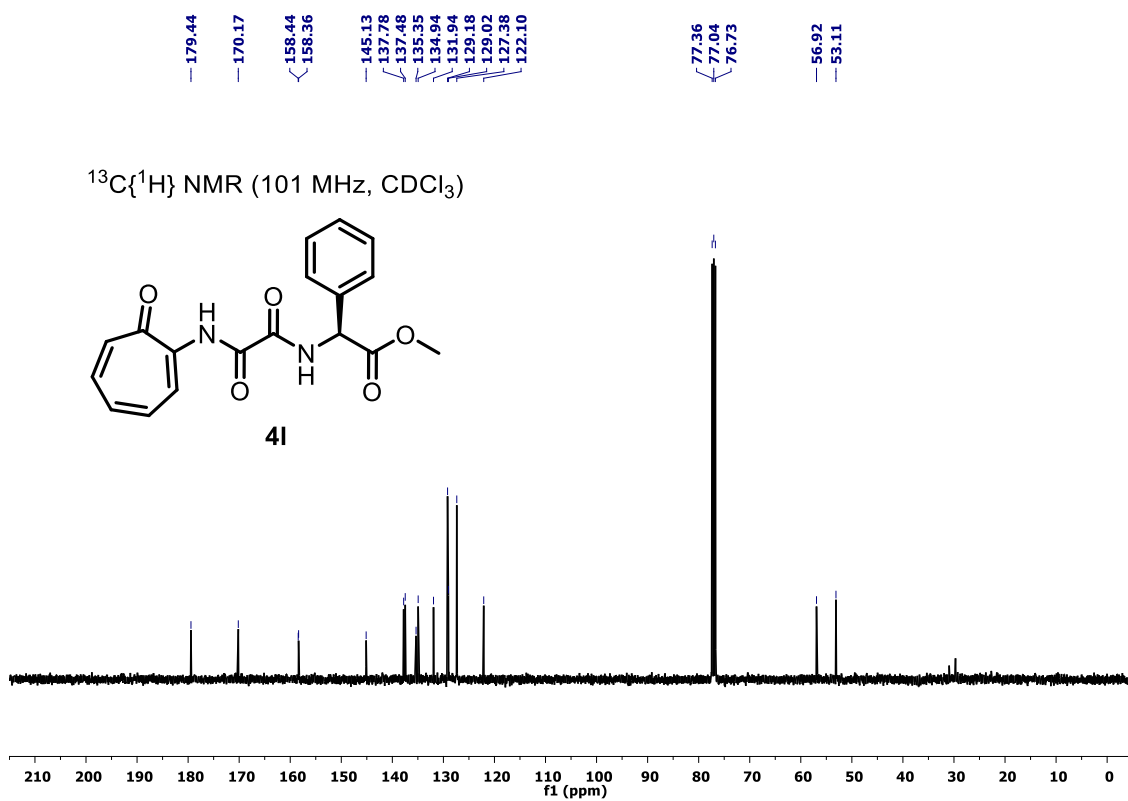

**Fig S57.** <sup>1</sup>H, <sup>13</sup>C {<sup>1</sup>H} NMR spectra of oxidized troponyl glycine derivative **4I**.

## Display Report

### Analysis Info

Analysis Name D:\Data\JULY-2021\NKS\17072021\_-NKS-CKJ-374-A.d  
Method Pos\_tune\_low\_05122019.m  
Sample Name Tmix-131118  
Comment

Acquisition Date 7/17/2021 5:32:57 PM

Operator Amit S.Sahu  
Instrument micrOTOF-Q II 10337

### Acquisition Parameter

|             |            |                       |           |                  |           |
|-------------|------------|-----------------------|-----------|------------------|-----------|
| Source Type | ESI        | Ion Polarity          | Positive  | Set Nebulizer    | 0.5 Bar   |
| Focus       | Not active | Set Capillary         | 4500 V    | Set Dry Heater   | 180 °C    |
| Scan Begin  | 50 m/z     | Set End Plate Offset  | -500 V    | Set Dry Gas      | 4.0 l/min |
| Scan End    | 3000 m/z   | Set Collision Cell RF | 130.0 Vpp | Set Divert Valve | Waste     |

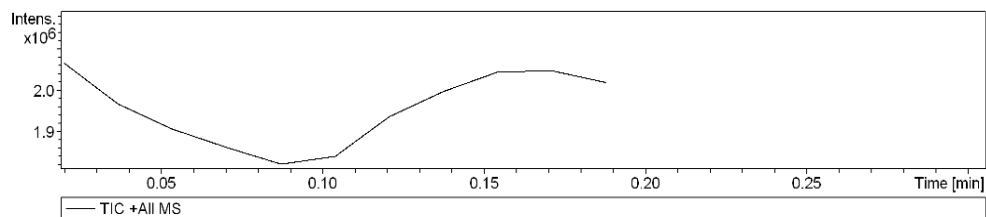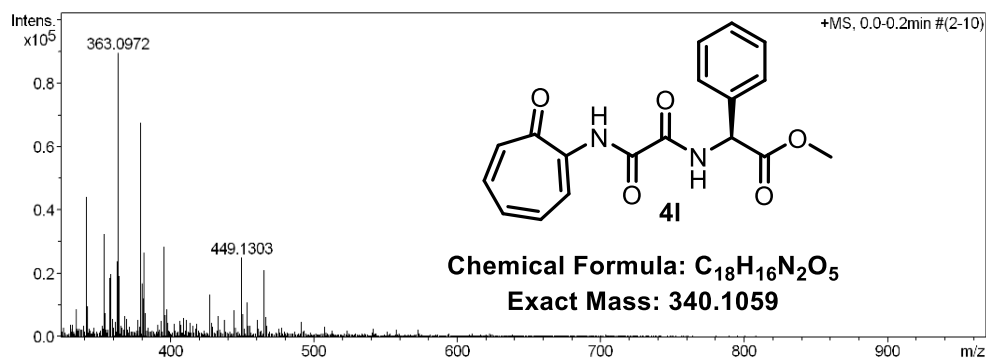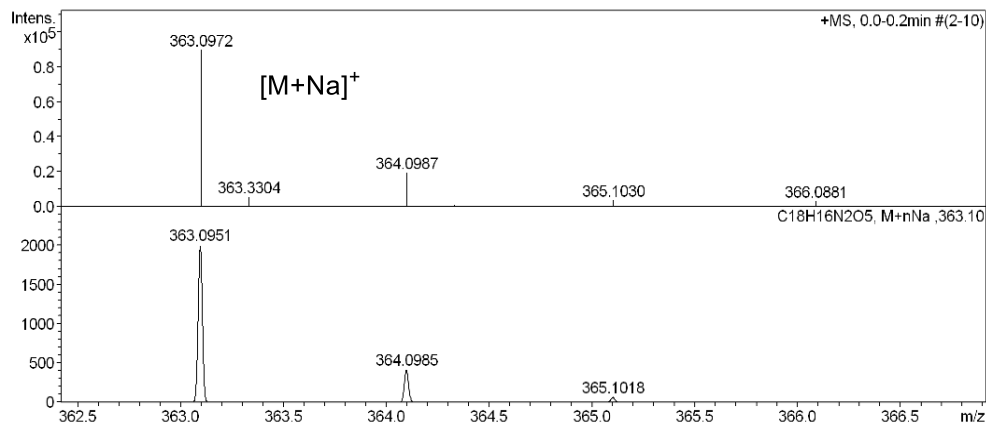

**Fig S58.** ESI-HRMS spectra of oxidized troponyl glycine derivative **4I**.

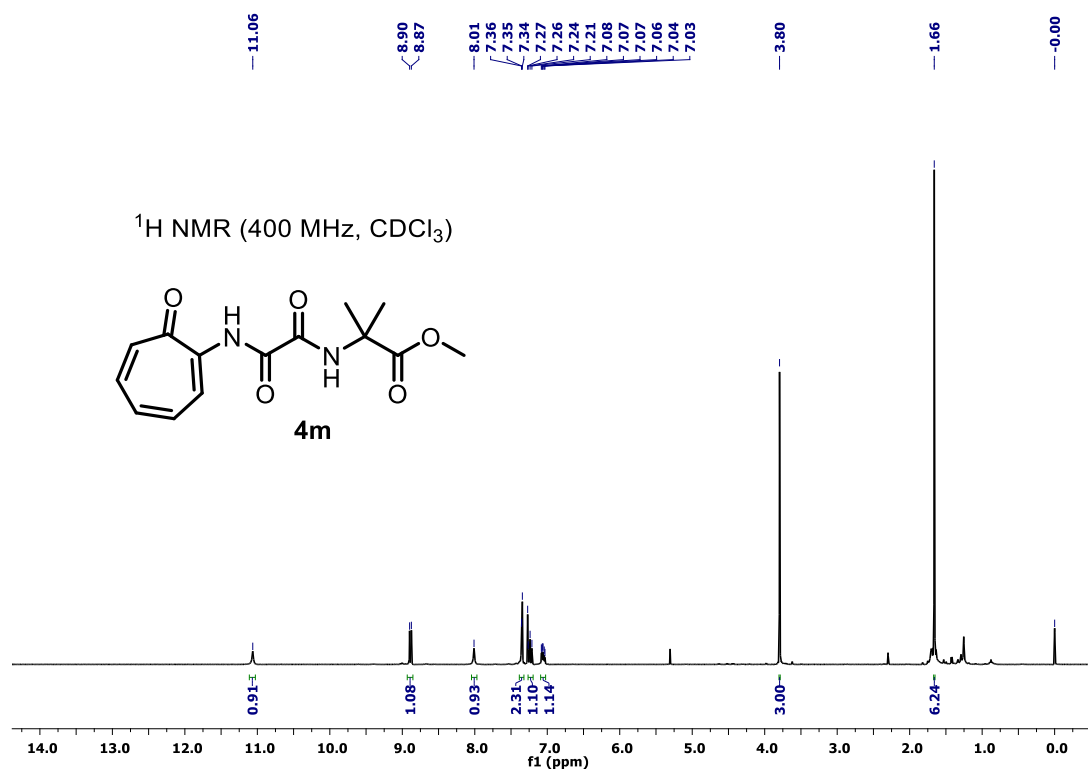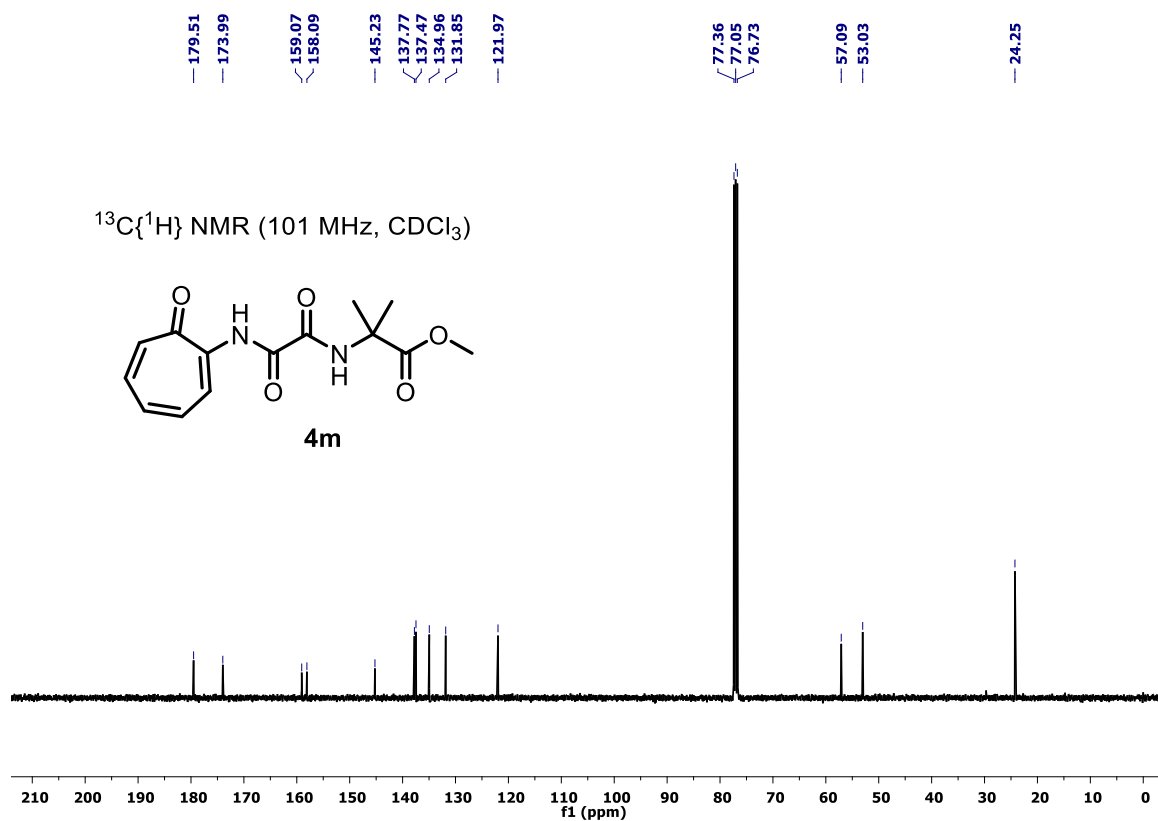

**Fig S59.** <sup>1</sup>H, <sup>13</sup>C {<sup>1</sup>H} NMR spectra of oxidized troponyl glycine derivative **4m**.

NKS\_CKJ\_1071

15-Feb-2023  
23:04:52

XEVO-G2XSQTOF#YFA1739

NKS\_15022023\_8 (0.053) Cu (0.05); Is (1.00,1.00) C<sub>14</sub>H<sub>16</sub>N<sub>2</sub>O<sub>5</sub>Na

1: TOF MS ES+  
8.42e12

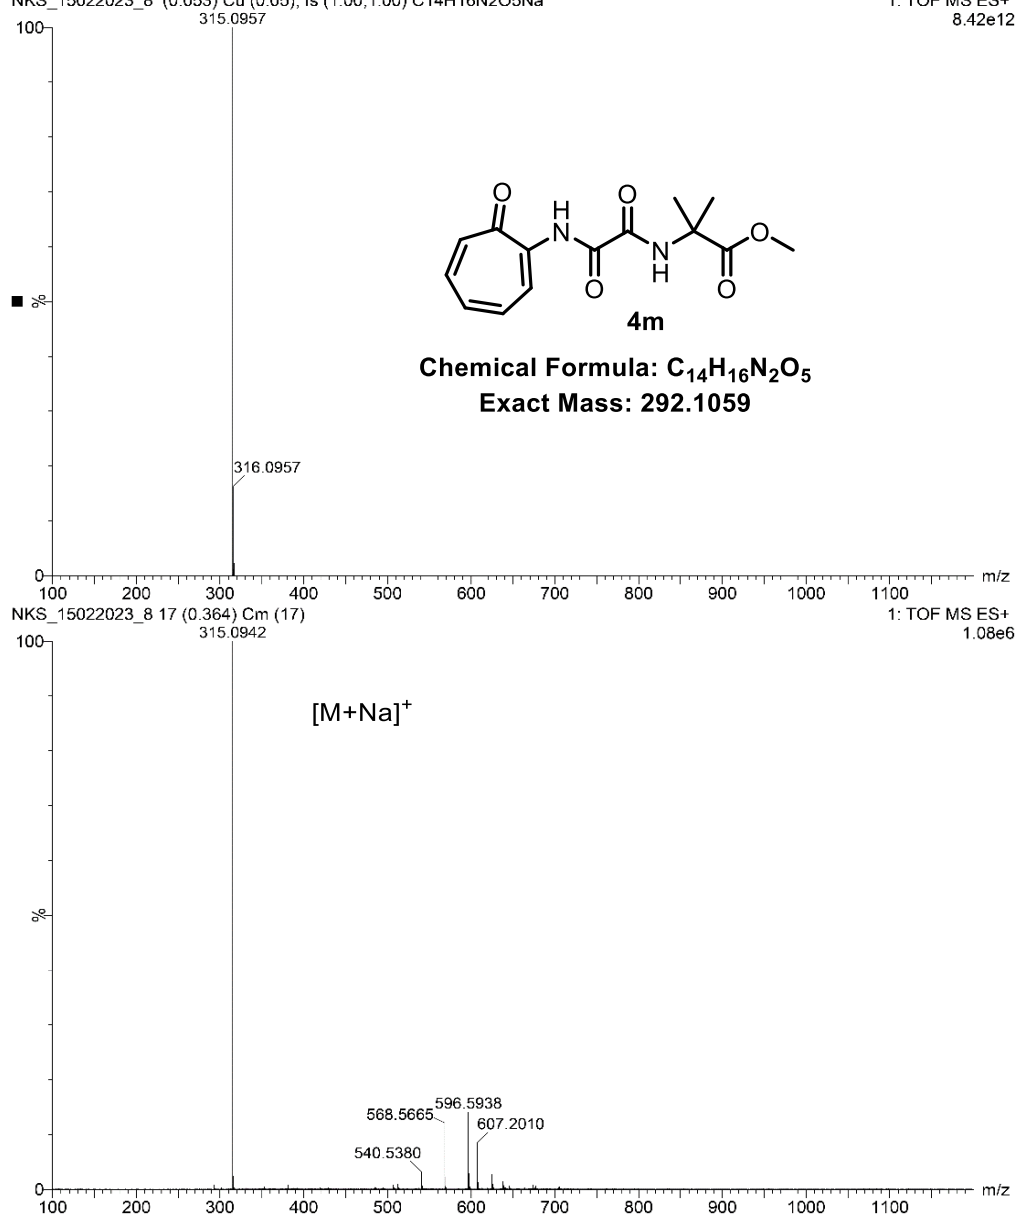

**Fig S60.** ESI-HRMS spectra of oxidized troponyl glycine derivative **4m**.

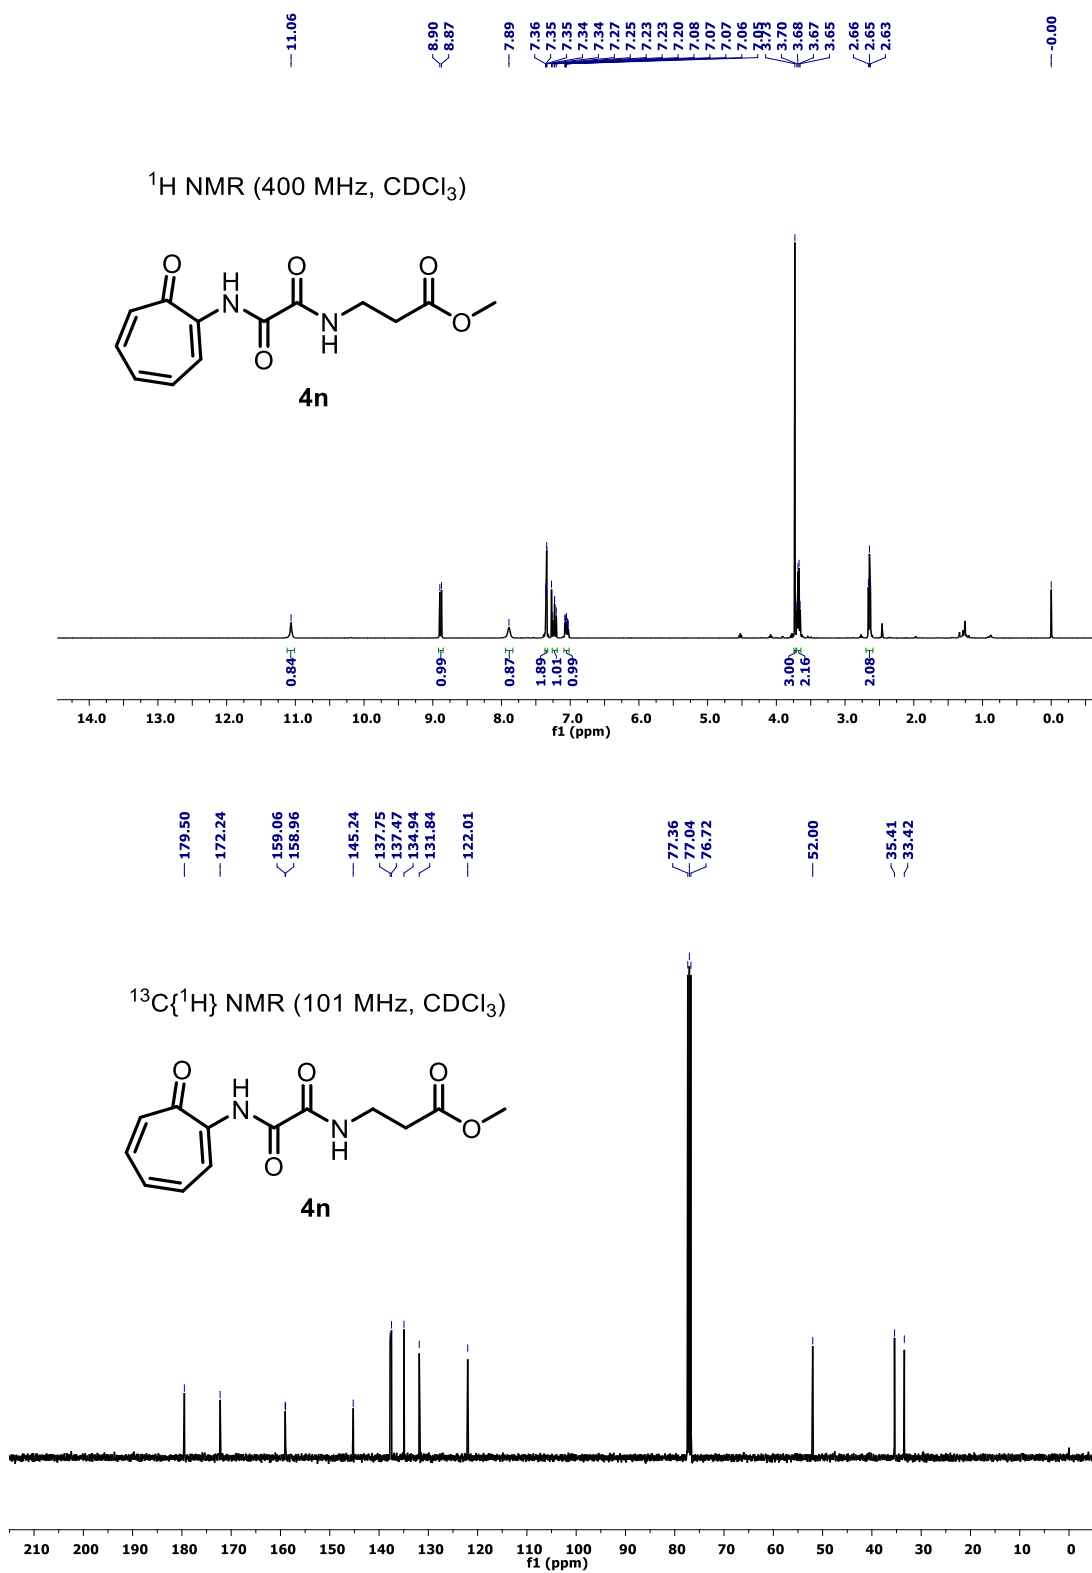

**Fig S61.** <sup>1</sup>H, <sup>13</sup>C {<sup>1</sup>H} NMR spectra of oxidized troponyl glycine derivative **4n**.

NKS\_CKJ\_1032

17-Feb-2023  
00:23:57

XEVO-G2XSQTOF#YFA1739

NKS\_16022023\_8 (0.053) Cu (0.05); ls (1.00,1.00) C<sub>13</sub>H<sub>14</sub>N<sub>2</sub>O<sub>5</sub>Na

1: TOF MS ES+  
8.51e12

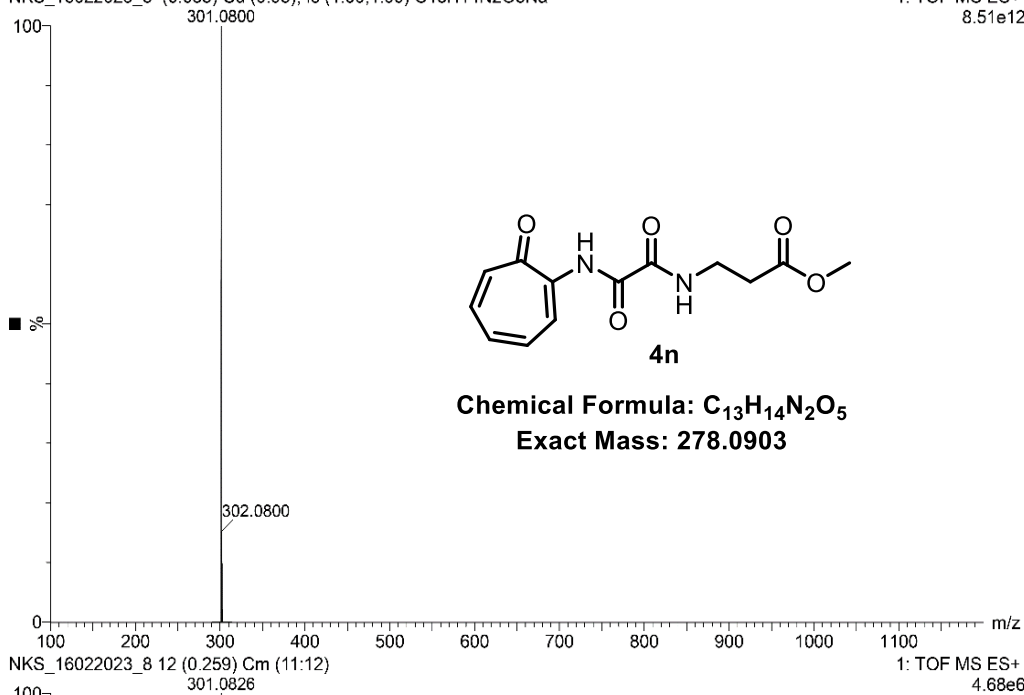

**Fig S62.** ESI-HRMS spectra of oxidized troponyl glycine derivative **4n**.

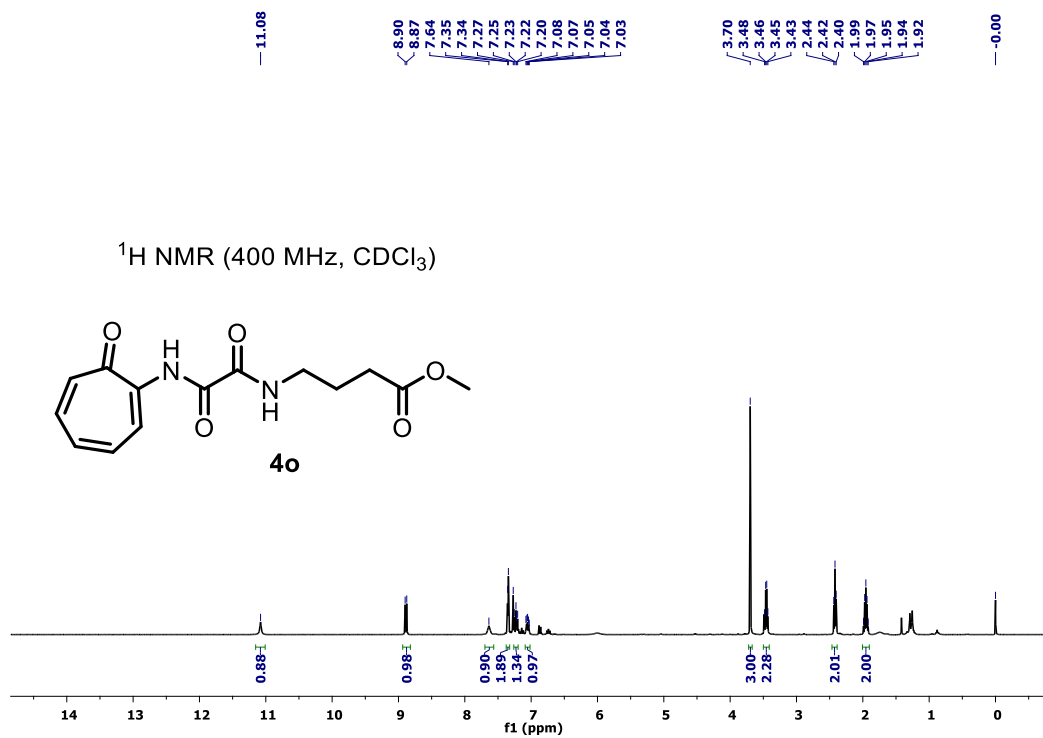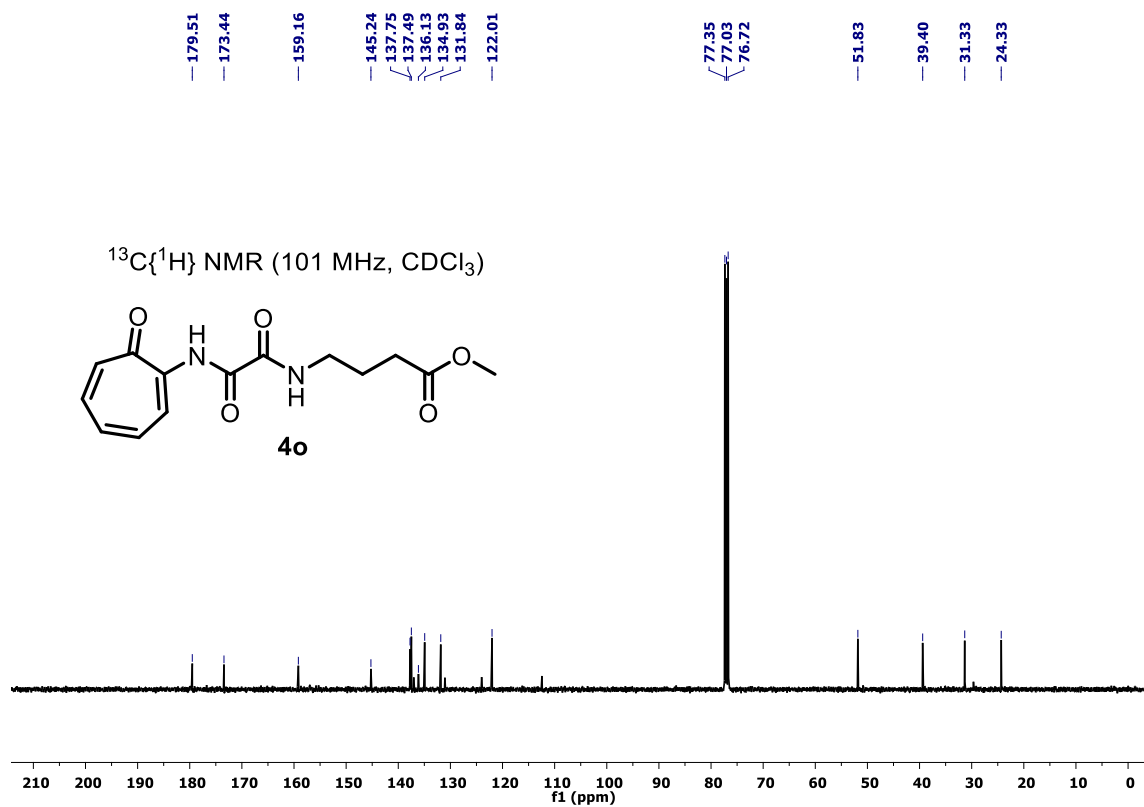

**Fig S63.** <sup>1</sup>H, <sup>13</sup>C {<sup>1</sup>H} NMR spectra of oxidized troponyl glycine derivative **4o**.



NKS\_CKJ\_1033

17-Feb-2023  
18:46:26

XEVO-G2XSQTOF#YFA1739

NKS\_17022023\_14 (0.053) Cu (0.05); Is (1.00,1.00) C<sub>14</sub>H<sub>16</sub>N<sub>2</sub>O<sub>5</sub>Na

1: TOF MS ES+  
8.42e12

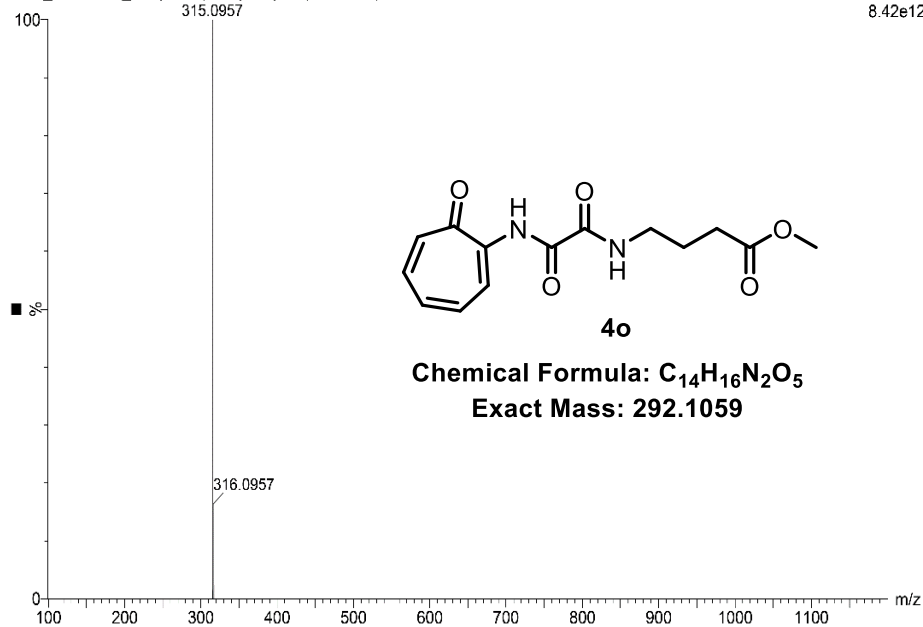

NKS\_17022023\_14 49 (0.984) Cm (47:49)

1: TOF MS ES+  
2.56e7

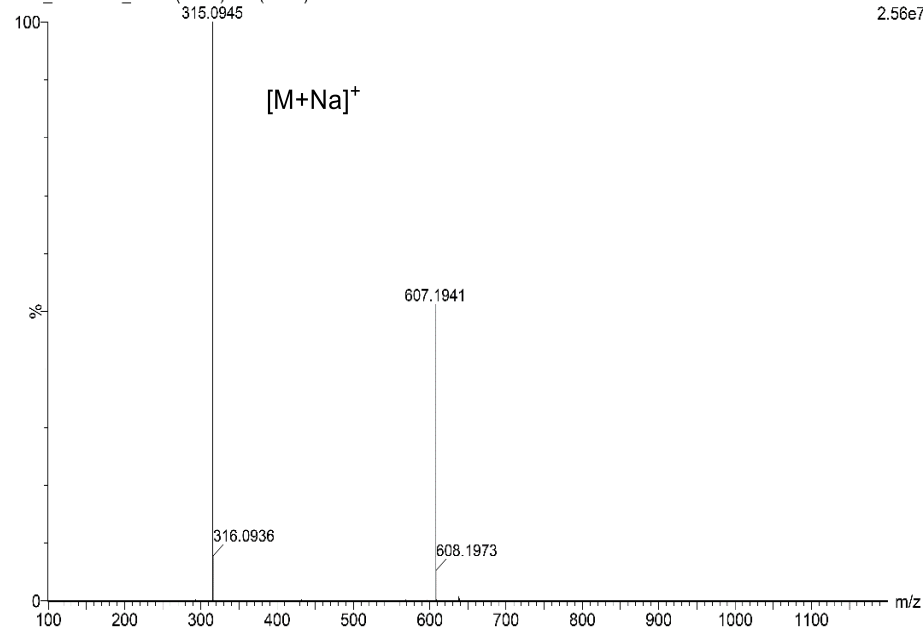

**Fig S64.** ESI-HRMS spectra of oxidized troponyl glycine derivative **4o**.

### 3. NMR Spectra of Non-troponyl (*N*-Aryl and *N*- Alkyl) Glycine Derivatives (*N*-phenyl glycinate and *N,N*- diethyl glycinate)

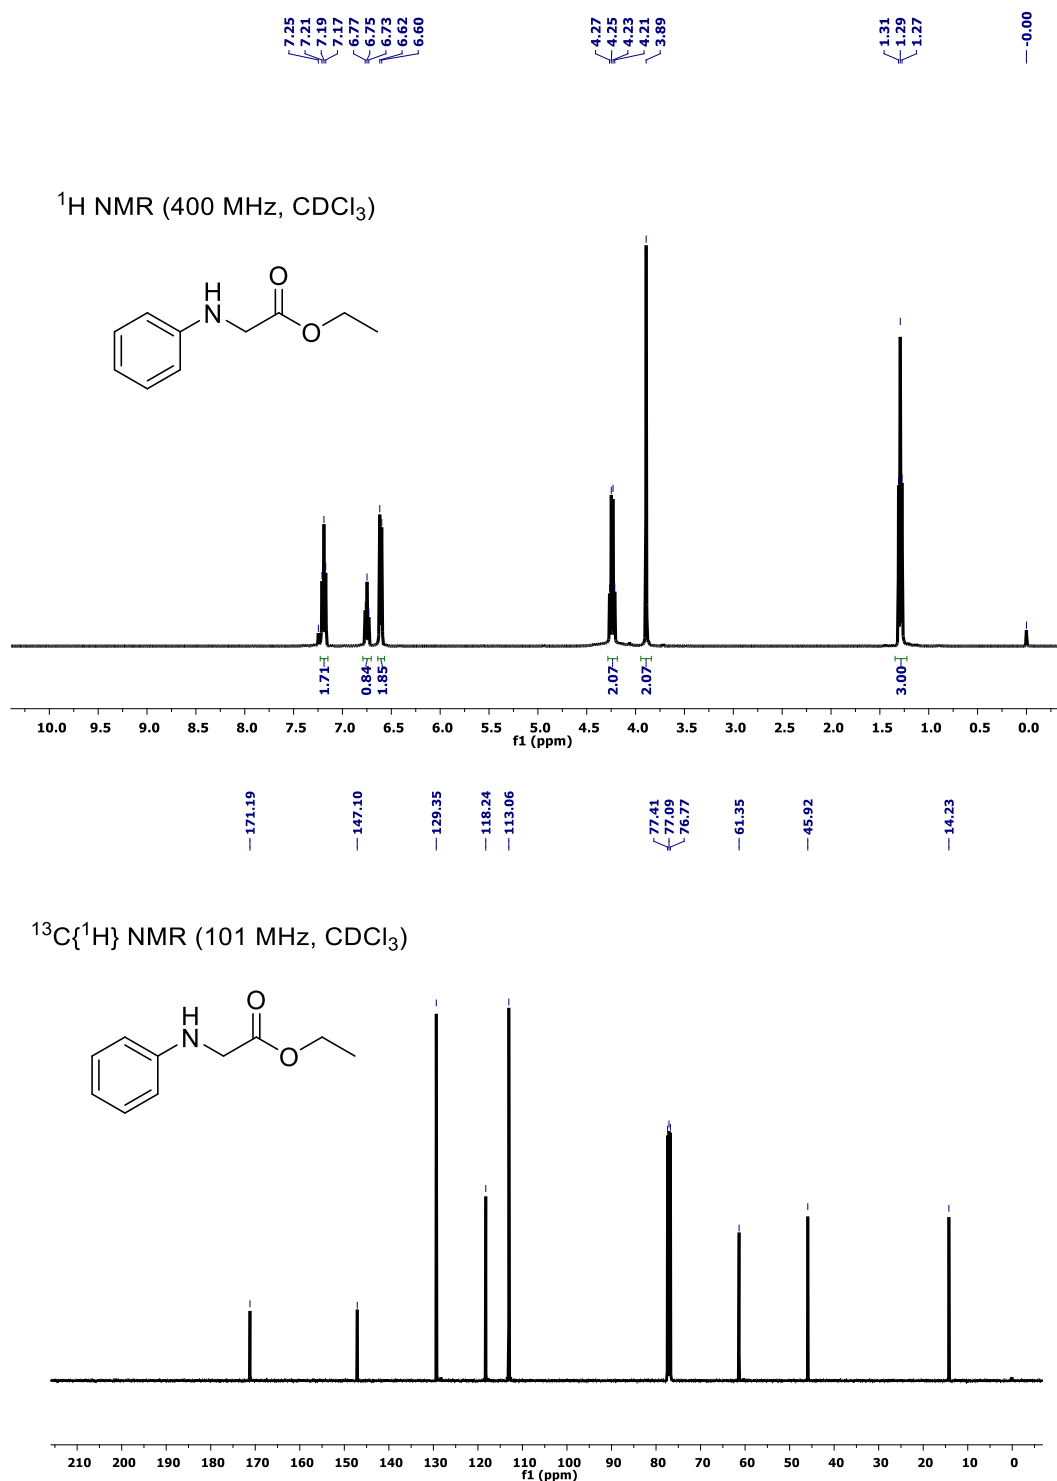

**Fig S65.** <sup>1</sup>H, <sup>13</sup>C {<sup>1</sup>H} NMR spectra of *N*-phenyl glycinate.

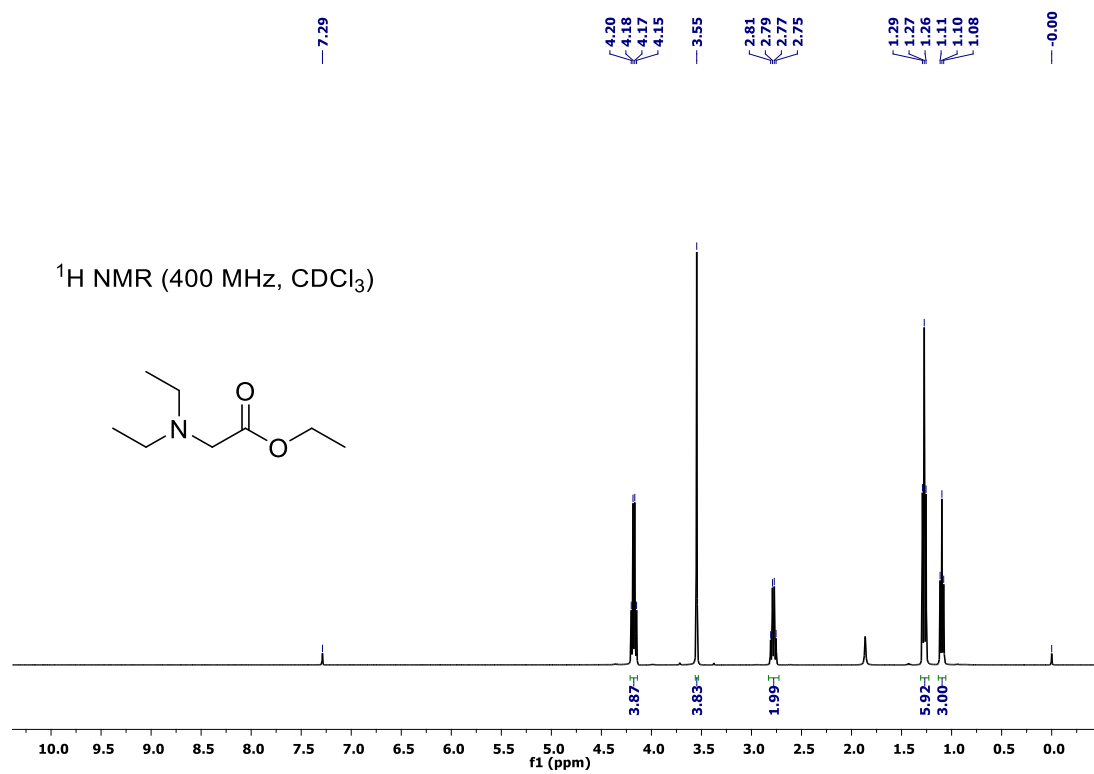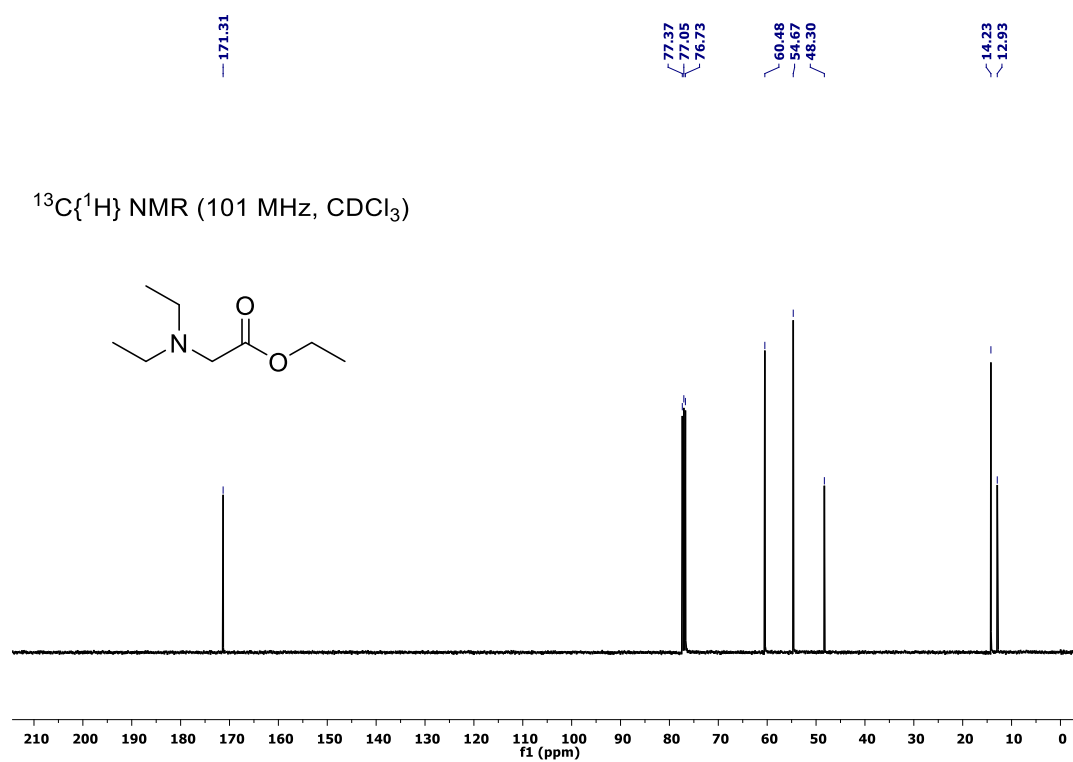

**Fig S66.** <sup>1</sup>H, <sup>13</sup>C {<sup>1</sup>H} NMR spectra of *N, N*- diethyl glycinate.

#### 4. X-Ray Studies of Single Crystals (**2a/4a/4b/4f/ 4g/2-Pd**)

**Compound 2a.** Single crystal of oxidized troponyl glycine derivative **2a** was obtained in solvent mixture ethylacetate and hexane by slow evaporation method. The crystal data of oxidized troponyl glycine derivative **2a** was collected on a Rigaku Oxford diffractometer at 100 K. Selected collection parameters and other crystallographic results are summarized below. The program package SHELXTL1 and Olex2 was used for structure solution and ORTEP diagram carried out by DIAMOND 3.2.

**Table S1 Crystal data and structure refinement for 2a.**

|                                             |                                                               |
|---------------------------------------------|---------------------------------------------------------------|
| Identification code                         | <b>2a</b>                                                     |
| Empirical formula                           | C <sub>11</sub> H <sub>11</sub> NO <sub>4</sub>               |
| Formula weight                              | 221.21                                                        |
| Temperature/K                               | 100.00(10)                                                    |
| Crystal system                              | monoclinic                                                    |
| Space group                                 | P2 <sub>1</sub> /c                                            |
| a/Å                                         | 13.3680(14)                                                   |
| b/Å                                         | 4.2874(5)                                                     |
| c/Å                                         | 19.184(2)                                                     |
| α/°                                         | 90                                                            |
| β/°                                         | 110.238(13)                                                   |
| γ/°                                         | 90                                                            |
| Volume/Å <sup>3</sup>                       | 1031.6(2)                                                     |
| Z                                           | 4                                                             |
| ρ <sub>calc</sub> /cm <sup>3</sup>          | 1.424                                                         |
| μ/mm <sup>-1</sup>                          | 0.110                                                         |
| F (000)                                     | 464.0                                                         |
| Crystal size/mm <sup>3</sup>                | 0.01 × 0.01 × 0.001                                           |
| Radiation                                   | Mo Kα (λ = 0.71073)                                           |
| 2θ range for data collection/°              | 6.496 to 60.238                                               |
| Index ranges                                | -17 ≤ h ≤ 17, -5 ≤ k ≤ 5, -21 ≤ l ≤ 26                        |
| Reflections collected                       | 6699                                                          |
| Independent reflections                     | 2388 [R <sub>int</sub> = 0.0549, R <sub>sigma</sub> = 0.0757] |
| Data/restraints/parameters                  | 2388/0/146                                                    |
| Goodness-of-fit on F <sup>2</sup>           | 1.001                                                         |
| Final R indexes [I >= 2σ (I)]               | R <sub>1</sub> = 0.0702, wR <sub>2</sub> = 0.1823             |
| Final R indexes [all data]                  | R <sub>1</sub> = 0.1037, wR <sub>2</sub> = 0.2041             |
| Largest diff. peak/hole / e Å <sup>-3</sup> | 0.44/-0.38                                                    |

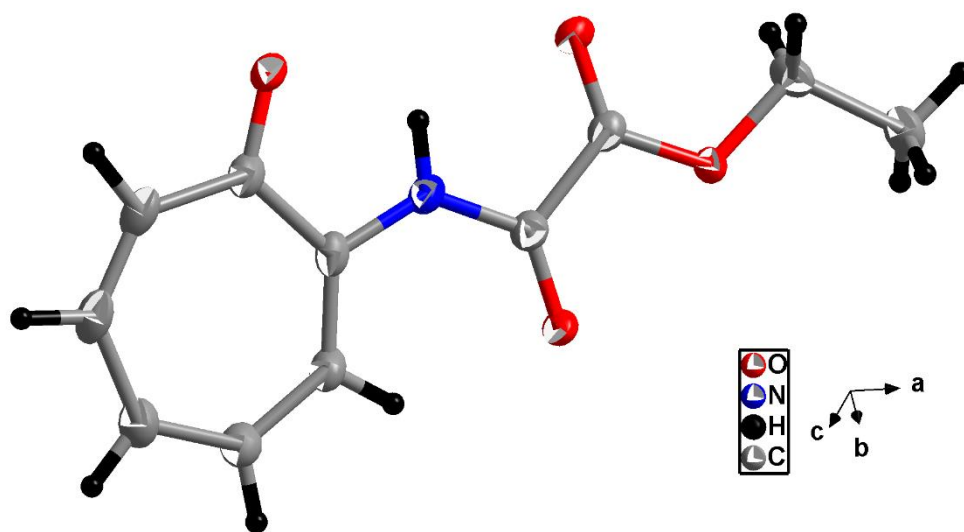

**Fig S67.** ORTEP diagram of oxidized troponyl glycine derivative **2a** [ellipsoid contour probability: 50%].

**Compound 4a.** Single crystal of oxidized troponyl glycine derivative **4a** was obtained in solvent mixture ethylacetate and hexane by slow evaporation method. The crystal data of oxalamide **4a** was collected on a Rigaku Oxford diffractometer at 292 K. Selected collection parameters and other crystallographic results are summarized below. The program package SHELXTL1 and Olex2 was used for structure solution and ORTEP diagram carried out by DIAMOND 3.2.

**Table S2 Crystal data and structure refinement for 4a.**

|                                             |                                                               |
|---------------------------------------------|---------------------------------------------------------------|
| Identification code                         | <b>4a</b>                                                     |
| Empirical formula                           | C <sub>10</sub> H <sub>22</sub> N <sub>2</sub> O <sub>7</sub> |
| Formula weight                              | 282.29                                                        |
| Temperature/K                               | 292(3)                                                        |
| Crystal system                              | monoclinic                                                    |
| Space group                                 | P2 <sub>1</sub> /c                                            |
| a/Å                                         | 12.9666(11)                                                   |
| b/Å                                         | 13.3233(10)                                                   |
| c/Å                                         | 8.2903(6)                                                     |
| α/°                                         | 90                                                            |
| β/°                                         | 102.069(8)                                                    |
| γ/°                                         | 90                                                            |
| Volume/Å <sup>3</sup>                       | 1400.56(19)                                                   |
| Z                                           | 4                                                             |
| ρ <sub>calc</sub> /cm <sup>3</sup>          | 1.339                                                         |
| μ/mm <sup>-1</sup>                          | 0.113                                                         |
| F (000)                                     | 608.0                                                         |
| Crystal size/mm <sup>3</sup>                | 0.021 × 0.012 × 0.001                                         |
| Radiation                                   | MoKα (λ = 0.71073)                                            |
| 2θ range for data collection/°              | 6.91 to 52.732                                                |
| Index ranges                                | -16 ≤ h ≤ 15, -16 ≤ k ≤ 15, -9 ≤ l ≤ 10                       |
| Reflections collected                       | 12306                                                         |
| Independent reflections                     | 2846 [R <sub>int</sub> = 0.0297, R <sub>sigma</sub> = 0.0262] |
| Data/restraints/parameters                  | 2846/0/190                                                    |
| Goodness-of-fit on F <sup>2</sup>           | 0.791                                                         |
| Final R indexes [I >= 2σ (I)]               | R <sub>1</sub> = 0.0417, wR <sub>2</sub> = 0.1687             |
| Final R indexes [all data]                  | R <sub>1</sub> = 0.0563, wR <sub>2</sub> = 0.1942             |
| Largest diff. peak/hole / e Å <sup>-3</sup> | 0.15/-0.16                                                    |

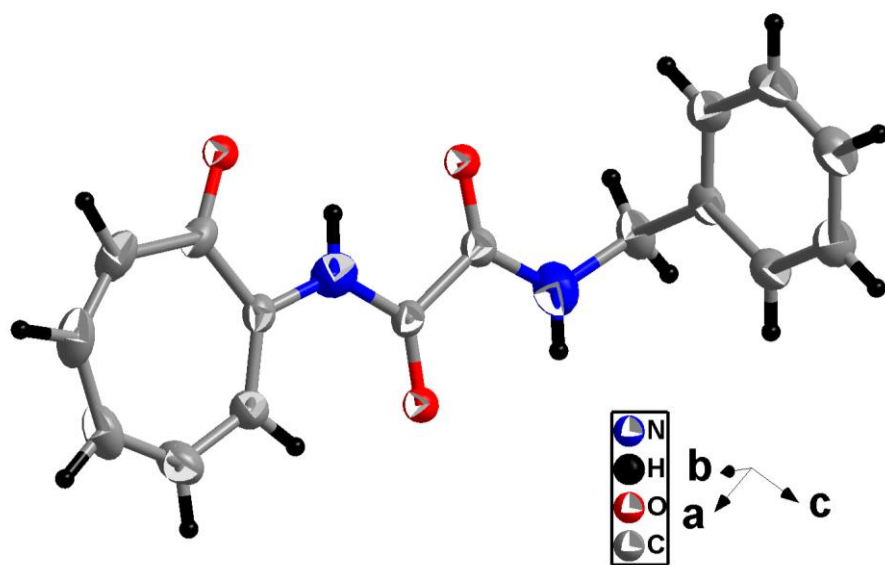

**Fig S68.** ORTEP diagram of oxidized troponyl glycine derivative **4a** [ellipsoid contour probability: 50%].

**Compound 4b.** Single crystal of oxidized troponyl glycine derivative **4b** was obtained in solvent mixture ethylacetate and hexane by slow evaporation method. The crystal data of oxalamide **4b** was collected on a Rigaku Oxford diffractometer at 248 K. Selected - collection parameters and other crystallographic results are summarized below. The program package SHELXTL1 and Olex2 was used for structure solution and ORTEP diagram carried out by DIAMOND 3.2.

**Table S3 Crystal data and structure refinement for 4b.**

|                                             |                                                               |
|---------------------------------------------|---------------------------------------------------------------|
| Identification code                         | <b>4b</b>                                                     |
| Empirical formula                           | C <sub>17</sub> H <sub>16</sub> N <sub>2</sub> O <sub>3</sub> |
| Formula weight                              | 296.32                                                        |
| Temperature/K                               | 248(50)                                                       |
| Crystal system                              | monoclinic                                                    |
| Space group                                 | P2 <sub>1</sub> /c                                            |
| a/Å                                         | 13.8803(10)                                                   |
| b/Å                                         | 13.7121(9)                                                    |
| c/Å                                         | 8.2130(5)                                                     |
| α/°                                         | 90                                                            |
| β/°                                         | 104.208(7)                                                    |
| γ/°                                         | 90                                                            |
| Volume/Å <sup>3</sup>                       | 1515.35(18)                                                   |
| Z                                           | 4                                                             |
| ρ <sub>calc</sub> /cm <sup>3</sup>          | 1.299                                                         |
| μ/mm <sup>-1</sup>                          | 0.090                                                         |
| F (000)                                     | 624.0                                                         |
| Crystal size/mm <sup>3</sup>                | 0.01 × 0.01 × 0.001                                           |
| Radiation                                   | MoKα (λ = 0.71073)                                            |
| 2θ range for data collection/°              | 6.67 to 60.264                                                |
| Index ranges                                | -18 ≤ h ≤ 16, -17 ≤ k ≤ 19, -11 ≤ l ≤ 10                      |
| Reflections collected                       | 14346                                                         |
| Independent reflections                     | 3667 [R <sub>int</sub> = 0.0384, R <sub>sigma</sub> = 0.0361] |
| Data/restraints/parameters                  | 3667/0/199                                                    |
| Goodness-of-fit on F <sup>2</sup>           | 1.045                                                         |
| Final R indexes [I>=2σ (I)]                 | R <sub>1</sub> = 0.0433, wR <sub>2</sub> = 0.1122             |
| Final R indexes [all data]                  | R <sub>1</sub> = 0.0697, wR <sub>2</sub> = 0.1252             |
| Largest diff. peak/hole / e Å <sup>-3</sup> | 0.14/-0.14                                                    |



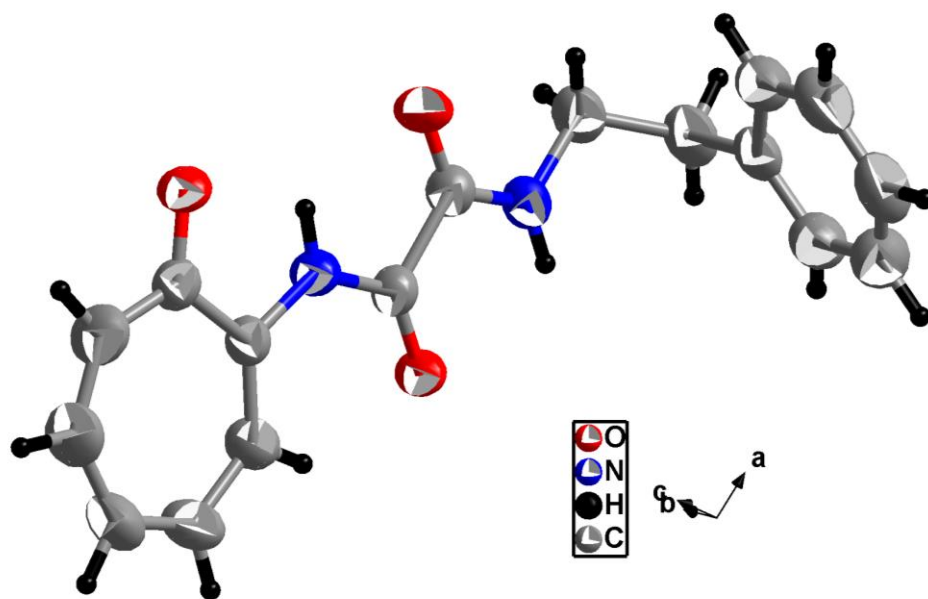

**Fig S69.** ORTEP diagram of oxidized troponyl glycine derivative **4b** [ellipsoid contour probability: 50%].

**Compound 4f.** Single crystal of oxidized troponyl glycine derivative **4f** was obtained in solvent mixture ethylacetate and hexane by slow evaporation method. The crystal data of oxalamide **4f** was collected on a Rigaku Oxford diffractometer at 205 K. Selected - collection parameters and other crystallographic results are summarized below. The program package SHELXTL1 and Olex2 was used for structure solution and ORTEP diagram carried out by DIAMOND 3.2.

**Table S4 Crystal data and structure refinement for 4f.**

|                                             |                                                                         |
|---------------------------------------------|-------------------------------------------------------------------------|
| Identification code                         | <b>4f</b>                                                               |
| Empirical formula                           | C <sub>2.18</sub> H <sub>2.18</sub> N <sub>0.36</sub> O <sub>0.91</sub> |
| Formula weight                              | 48.04                                                                   |
| Temperature/K                               | 205(6)                                                                  |
| Crystal system                              | triclinic                                                               |
| Space group                                 | P-1                                                                     |
| a/Å                                         | 8.1779(9)                                                               |
| b/Å                                         | 9.0116(6)                                                               |
| c/Å                                         | 10.0761(8)                                                              |
| α/°                                         | 113.570(7)                                                              |
| β/°                                         | 95.895(8)                                                               |
| γ/°                                         | 112.019(9)                                                              |
| Volume/Å <sup>3</sup>                       | 602.44(10)                                                              |
| Z                                           | 11                                                                      |
| ρ <sub>calc</sub> /cm <sup>3</sup>          | 1.457                                                                   |
| μ/mm <sup>-1</sup>                          | 0.115                                                                   |
| F (000)                                     | 276.0                                                                   |
| Crystal size/mm <sup>3</sup>                | 0.01 × 0.01 × 0.001                                                     |
| Radiation                                   | Mo Kα (λ = 0.71073)                                                     |
| 2θ range for data collection/°              | 6.812 to 60.938                                                         |
| Index ranges                                | -10 ≤ h ≤ 10, -11 ≤ k ≤ 11, -13 ≤ l ≤ 13                                |
| Reflections collected                       | 10853                                                                   |
| Independent reflections                     | 2925 [R <sub>int</sub> = 0.0514, R <sub>sigma</sub> = 0.0472]           |
| Data/restraints/parameters                  | 2925/0/173                                                              |
| Goodness-of-fit on F <sup>2</sup>           | 1.033                                                                   |
| Final R indexes [I >= 2σ (I)]               | R <sub>1</sub> = 0.0499, wR <sub>2</sub> = 0.1214                       |
| Final R indexes [all data]                  | R <sub>1</sub> = 0.0764, wR <sub>2</sub> = 0.1371                       |
| Largest diff. peak/hole / e Å <sup>-3</sup> | 0.22/-0.31                                                              |

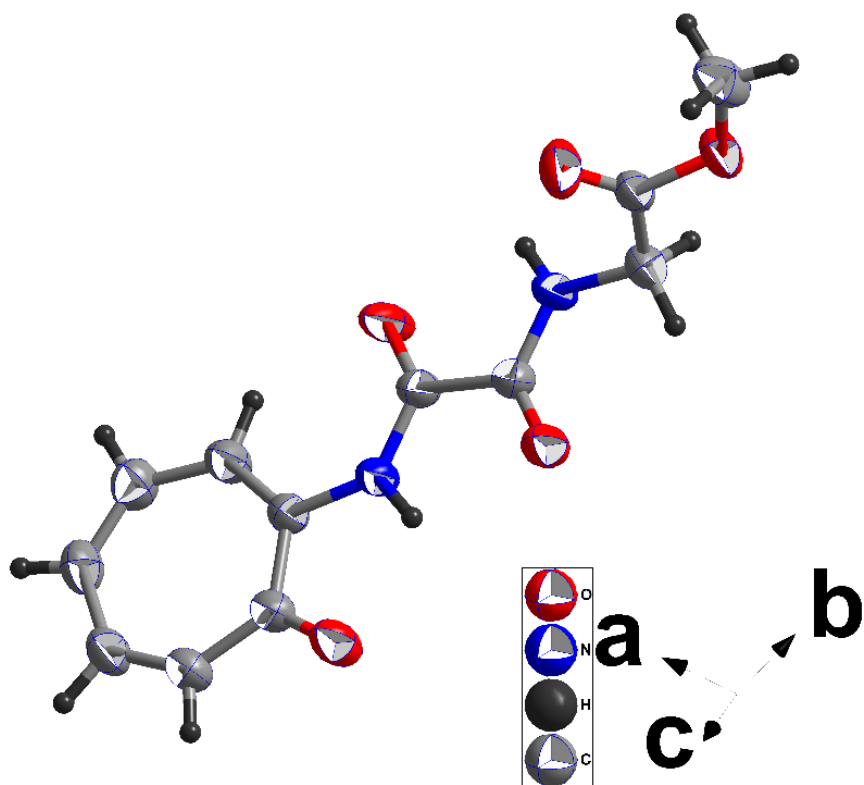

**Fig S70.** ORTEP diagram of oxidized troponyl glycine derivative **4f** [ellipsoid contour probability: 50%].

**Compound 4g.** Single crystal of oxidized troponyl glycine derivative **4g** was obtained in solvent mixture ethylacetate and hexane by slow evaporation method. The crystal data of oxalamide **4g** was collected on a Rigaku Oxford diffractometer at 193 K. Selected - collection parameters and other crystallographic results are summarized below. The program package SHELXTL1 and Olex2 was used for structure solution and ORTEP diagram carried out by DIAMOND 3.2.

**Table S5 Crystal data and structure refinement for 4g.**

|                                             |                                                                |
|---------------------------------------------|----------------------------------------------------------------|
| Identification code                         | <b>4g</b>                                                      |
| Empirical formula                           | C <sub>26</sub> H <sub>28</sub> N <sub>4</sub> O <sub>10</sub> |
| Formula weight                              | 556.52                                                         |
| Temperature/K                               | 193(14)                                                        |
| Crystal system                              | orthorhombic                                                   |
| Space group                                 | P2 <sub>1</sub> 2 <sub>1</sub> 2 <sub>1</sub>                  |
| a/Å                                         | 7.0174(2)                                                      |
| b/Å                                         | 19.6228(4)                                                     |
| c/Å                                         | 19.9031(5)                                                     |
| α/°                                         | 90                                                             |
| β/°                                         | 90                                                             |
| γ/°                                         | 90                                                             |
| Volume/Å <sup>3</sup>                       | 2740.68(12)                                                    |
| Z                                           | 4                                                              |
| ρ <sub>calc</sub> /cm <sup>3</sup>          | 1.349                                                          |
| μ/mm <sup>-1</sup>                          | 0.889                                                          |
| F (000)                                     | 1168.0                                                         |
| Crystal size/mm <sup>3</sup>                | 0.01 × 0.01 × 0.001                                            |
| Radiation                                   | Cu Kα (λ = 1.54184)                                            |
| 2θ range for data collection/°              | 8.886 to 151.168                                               |
| Index ranges                                | -8 ≤ h ≤ 4, -24 ≤ k ≤ 24, -25 ≤ l ≤ 24                         |
| Reflections collected                       | 12621                                                          |
| Independent reflections                     | 5077 [R <sub>int</sub> = 0.0389, R <sub>sigma</sub> = 0.0477]  |
| Data/restraints/parameters                  | 5077/0/365                                                     |
| Goodness-of-fit on F <sup>2</sup>           | 1.040                                                          |
| Final R indexes [I ≥ 2σ (I)]                | R <sub>1</sub> = 0.0434, wR <sub>2</sub> = 0.1179              |
| Final R indexes [all data]                  | R <sub>1</sub> = 0.0497, wR <sub>2</sub> = 0.1230              |
| Largest diff. peak/hole / e Å <sup>-3</sup> | 0.15/-0.16                                                     |
| Flack parameter                             | 0.21(16)                                                       |

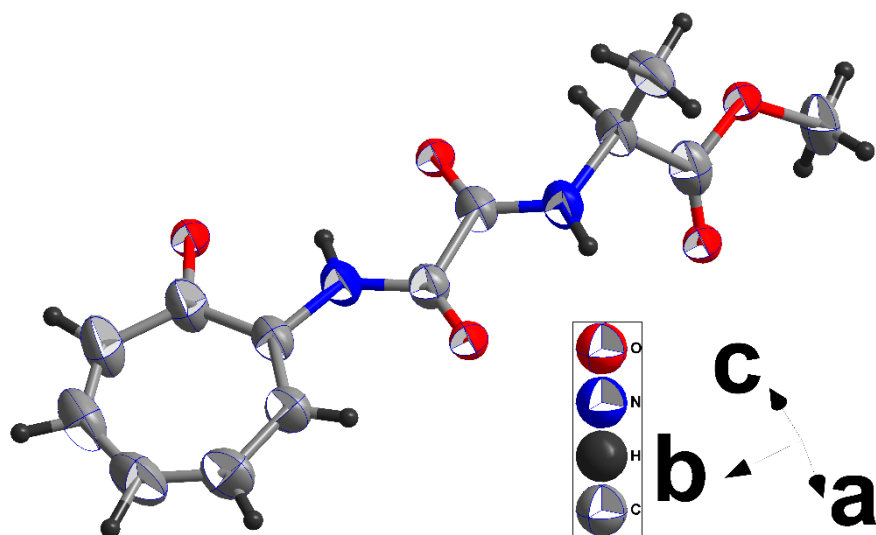

**Fig S71.** ORTEP diagram of oxidized troponyl glycine derivative **4g** [ellipsoid contour probability: 50%].

**Compound 2-Pd(II) complex.** Single crystal of *troponyl* glycine derivative- Pd complex (2- Pd) was obtained in solvent mixture ethylacetate and hexane by slow evaporation method. The crystal data of palladacycle (2- Pd) was collected on a Rigaku Oxford diffractometer at 270 K. Selected collection parameters and other crystallographic results are summarized below. The program package SHELXTL1 and Olex2 was used for structure solution and ORTEP diagram carried out by DIAMOND 3.2.

**Table S6 Crystal data and structure refinement for 2- Pd.**

|                                             |                                                                   |
|---------------------------------------------|-------------------------------------------------------------------|
| Identification code                         | <b>2- Pd</b>                                                      |
| Empirical formula                           | C <sub>11</sub> H <sub>12</sub> NO <sub>3</sub> Pd <sub>0.5</sub> |
| Formula weight                              | 259.42                                                            |
| Temperature/K                               | 270(3)                                                            |
| Crystal system                              | monoclinic                                                        |
| Space group                                 | P2 <sub>1</sub> /n                                                |
| a/Å                                         | 13.4678(9)                                                        |
| b/Å                                         | 5.0155(3)                                                         |
| c/Å                                         | 17.0923(10)                                                       |
| α/°                                         | 90                                                                |
| β/°                                         | 111.300(7)                                                        |
| γ/°                                         | 90                                                                |
| Volume/Å <sup>3</sup>                       | 1075.68(12)                                                       |
| Z                                           | 4                                                                 |
| ρ <sub>calc</sub> /cm <sup>3</sup>          | 1.602                                                             |
| μ/mm <sup>-1</sup>                          | 7.319                                                             |
| F (000)                                     | 528.0                                                             |
| Crystal size/mm <sup>3</sup>                | 0.01 × 0.01 × 0.001                                               |
| Radiation                                   | Cu Kα (λ = 1.54184)                                               |
| 2θ range for data collection/°              | 7.214 to 151.446                                                  |
| Index ranges                                | -16 ≤ h ≤ 16, -6 ≤ k ≤ 6, -21 ≤ l ≤ 21                            |
| Reflections collected                       | 8238                                                              |
| Independent reflections                     | 2126 [R <sub>int</sub> = 0.1131, R <sub>sigma</sub> = 0.0713]     |
| Data/restraints/parameters                  | 2126/0/143                                                        |
| Goodness-of-fit on F <sup>2</sup>           | 1.084                                                             |
| Final R indexes [I ≥ 2σ (I)]                | R <sub>1</sub> = 0.0756, wR <sub>2</sub> = 0.2096                 |
| Final R indexes [all data]                  | R <sub>1</sub> = 0.0915, wR <sub>2</sub> = 0.2286                 |
| Largest diff. peak/hole / e Å <sup>-3</sup> | 1.53/-1.50                                                        |

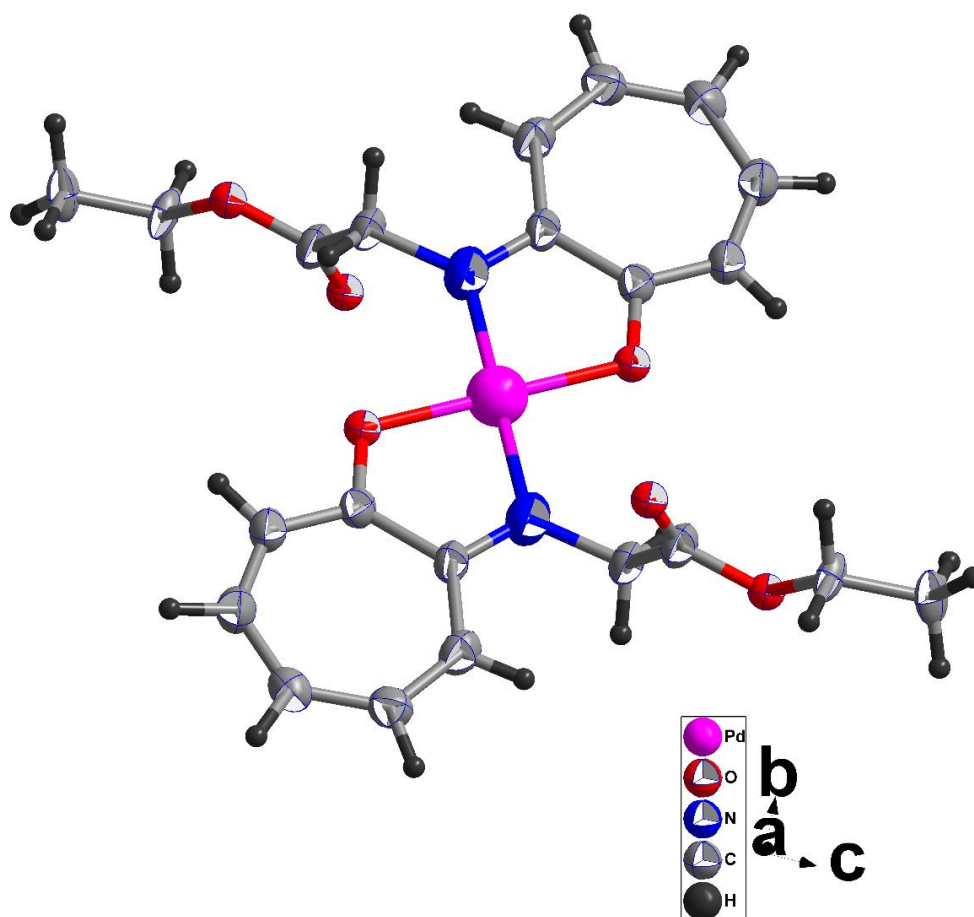

**Fig S72.** ORTEP diagram of *troponyl* glycine – Pd complex (**2- Pd**) [ellipsoid contour probability: 50%].
